# Supplementary material
Source: PubMed Central journal article supplement (PMC7233328)

# **Regioselective and Stereoselective Rhodium(II)-Catalyzed C–H Functionalization of Cyclobutanes**

## **Supporting Information**

Experimental procedures and characterization data for new compounds.

### **Table of Contents**

|                                                                       |     |
|-----------------------------------------------------------------------|-----|
| General Considerations                                                | S2  |
| Synthesis of Substrates                                               | S4  |
| C-H Functionalization of Cyclobutane Derivatives                      | S13 |
| Relative Rates of C-H Functionalization Study                         | S49 |
| Determination of Absolute Configuration                               | S54 |
| References                                                            | S55 |
| Copies of $^1\text{H}$ , $^{13}\text{C}$ NMR spectra, and HPLC Traces | S57 |

**General Considerations:** Reactions were carried out under argon in flame-dried or oven-dried glassware unless otherwise specified. Dichloromethane, diethyl ether, tetrahydrofuran, and toluene were purified using a GlassContour solvent system. Chloroform used for C–H functionalization reactions was dried over 4Å molecular sieves and degassed for 1 h with argon and stored under argon for 24 h prior to use. Dichloromethane and 1,2-dichloroethane were distilled under argon from calcium hydride onto molecular sieves and stored under argon for 24 h prior to use.  $^1\text{H}$  NMR spectra were recorded at either 300 MHz, 400 MHz, 500 MHz, or 600 MHz on Mercury-300, Varian-400, Varian-500, or Bruker 600 spectrometers.  $^{13}\text{C}$  NMR spectra were recorded at either 75 MHz, 100 MHz, 126 MHz, or 151 MHz on Mercury-300, Varian-400, Varian-500, or Bruker 600 spectrometers.  $^{19}\text{F}$  NMR spectra were recorded at 282 on Varian-300 spectrometer. NMR spectra were obtained from solutions of deuterated chloroform ( $\text{CDCl}_3$ ) with residual solvent serving as internal standard (7.26 ppm for  $^1\text{H}$  and 77.16 ppm for  $^{13}\text{C}$ ). NMR shifts were reported in parts per million (ppm). Abbreviations for signal multiplicity are as follow: s = singlet, d = doublet, t = triplet, q = quartet, m = multiplet, dd = doublet of doublet, etc. Coupling constants ( $J$  values) were calculated directly from the spectra. IR spectra were collected on a Nicolet iS10 FT-IR spectrometer. Mass spectra were taken on a Thermo Finnigan LTQ-FTMS spectrometer with APCI, ESI or NSI. Thin layer chromatographic analysis was performed with glass-backed silica gel plates, visualizing with UV light, and staining with aqueous  $\text{KMnO}_4$  or cerium molybdate stain. Racemic standards were generated by performing reactions with  $\text{Rh}_2(\text{OAc})_4$  or from  $\text{Rh}_2(R/S\text{-DOSP})_4$  or  $\text{Rh}_2(R/S\text{-2CI-TPCP})_4$  which was generated by dissolving an equimolar mixture of the *R* and *S* catalyst in a minimal amount of benzene and lyophilizing.

**Figure S1.** Catalyst Structures.

The following catalysts were used in this study and have been prepared previously.

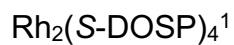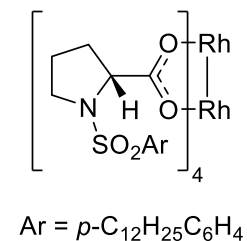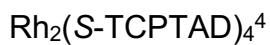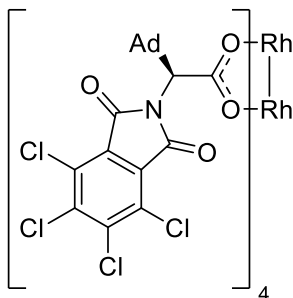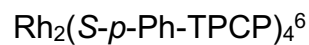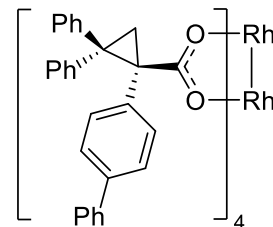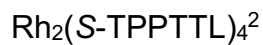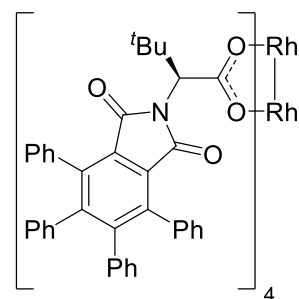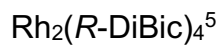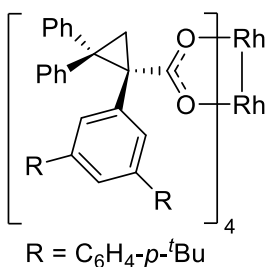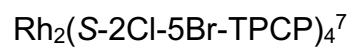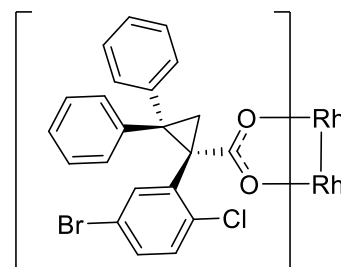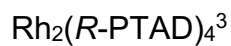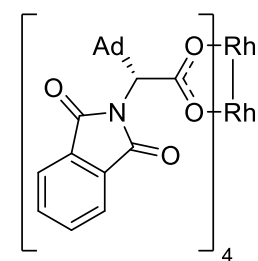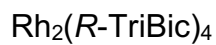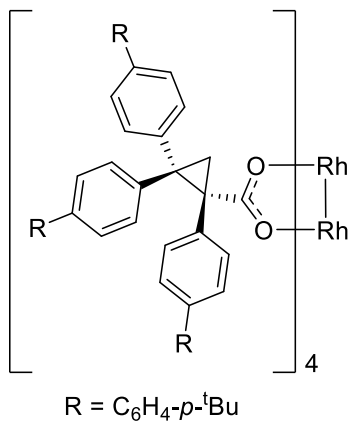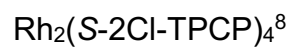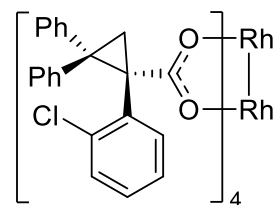

## Synthesis of Substrates and Reagents

### Synthesis of Diazos Compounds:

The following diazoacetates were prepared previously:

2,2,2-trichloroethyl 2-(4-bromophenyl)-2-diazoacetate (**7**)<sup>9</sup>

2,2,2-trifluoroethyl 2-(4-bromophenyl)-2-diazoacetate<sup>10</sup>

2,2,2-tribromoethyl 2-(4-bromophenyl)-2-diazoacetate<sup>9</sup>

2,2,2-trichloroethyl 2-(4-acetoxyphenyl)-2-diazoacetate<sup>10</sup>

2,2,2-trichloroethyl 2-diazo-2-(4-fluorophenyl)acetate<sup>9</sup>

2,2,2-trichloroethyl 2-diazo-2-(p-tolyl)acetate<sup>10</sup>

2,2,2-trichloroethyl 2-(4-(tert-butyl)phenyl)-2-diazoacetate<sup>9</sup>

2,2,2-trichloroethyl 2-diazo-2-(3-methoxyphenyl)acetate<sup>10</sup>

2,2,2-trichloroethyl 2-(6-chloropyridin-3-yl)-2-diazoacetate<sup>10</sup>

2,2,2-trichloroethyl 2-diazo-2-(3,5-dibromophenyl)acetate<sup>5</sup>

2,2,2-trichloroethyl 2-(2-chloropyrimidin-5-yl)-2-diazoacetate<sup>10</sup>

## Synthesis of Aryl Cyclobutanes

The synthesis of most aryl-substituted cyclobutanes could be accomplished by utilizing a Grignard reagent addition to cyclobutanone followed by reduction of the tertiary alcohol in one step or two steps (elimination followed by hydrogenation). Heteroaryl-substituted cyclobutanes were synthesized as follows:

4-cyclobutyl-2,6-dimethylpyridine was prepared according to a literature procedure<sup>11</sup>.

Characterization data for this compound were consistent with those reported in the original paper.

5-cyclobutyl-2-methoxypyridine was prepared via the Negishi coupling reaction of 5-bromo-2-methoxypyridine with cyclobutylzinc bromide. Characterization data for the product were consistent with those previously reported in the chemical literature<sup>12</sup>.

### General Procedure 1 for the Synthesis of Aryl Substituted Cyclobutanes

The aryl substituted cyclobutanes were generated by a two step sequence (Scheme S1).

**Scheme S1.** Synthesis of aryl cyclobutanes using General Procedure 1.

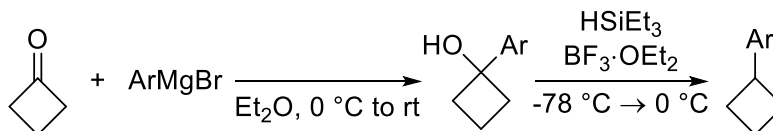

### *General Procedure 1, Part A*

A 3-necked round-bottom flask was equipped with a condenser and addition funnel, and then it was flame-dried under vacuum. After cooling under argon, magnesium (2.5 equiv) was added. The Grignard reagent was formed by the dropwise addition of the corresponding aryl bromide (1.5 equiv) in Et<sub>2</sub>O (1 M to the aryl bromide). The Grignard reagent was formed by heating to reflux for 5 h. After formation of the Grignard reagent, the solution was cooled to 0 °C, and then cyclobutanone (1.0 equiv) was added as a solution in ether (0.4 M to cyclobutanone). The reaction mixture was allowed to come to room temperature, and then stirred overnight. The reaction was quenched by the addition of saturated ammonium chloride at 0 °C. The aqueous layer was extracted 3x50 mL ether. The organics were combined and then washed with brine. The organic layer was dried with magnesium sulfate, filtered, and then residual solvent was removed under reduced pressure. The crude material was purified by silica gel chromatography using hexanes/ethyl acetate as eluent.

### *General Procedure 1, Part B*

A round-bottom flask was flame-dried and then cooled under argon. The tertiary alcohol was added (1.0 equiv) followed by anhydrous dichloromethane (0.25 M to the tertiary alcohol). Triethylsilane was added, and then the reaction mixture was cooled to -78 °C. Once the mixture was cooled, BF<sub>3</sub>·OEt<sub>2</sub> (3.2 equiv) was added dropwise. The reaction mixture was stirred at -78 °C for 30 minutes, and then was stirred at -40 °C for 30 minutes and then was stirred at 0 °C for 60 minutes. The reaction mixture was slowly quenched by an equal volume of saturated sodium bicarbonate at 0 °C. The layers were separated,

and then the aqueous layer was extracted 3 x 50 mL dichloromethane. The organics were combined, dried with magnesium sulfate, filtered, and then the solvent was removed under reduce pressure. The aryl-substituted cyclobutanes were purified by column chromatography on silica gel using pentanes as eluant and/or Kugelrohr distillation.

Note: The addition of heteroaromatic-based Grignard reagents was accomplished using methods developed by Senanayake and coworkers.<sup>13</sup>

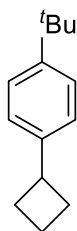

**1-(*Tert*-butyl)-4-cyclobutylbenzene (6).** The title compound was prepared by the reduction of 1-(4-(*tert*-butyl)phenyl)cyclobutan-1-ol<sup>14</sup> (5.24 g, 25.6 mmol) as outlined in General Procedure 1. The cyclobutane was purified by column chromatography using pentanes as eluant. This procedure afforded the title compound (4.5 g, 94%) as a colorless oil. The spectrum was consistent with previously reported <sup>1</sup>H NMR spectra<sup>15</sup>: <sup>1</sup>H NMR (400 MHz, CDCl<sub>3</sub>)  $\delta$  7.33 (d,  $J$  = 8.2 Hz, 2H), 7.17 (d,  $J$  = 8.2 Hz, 2H), 3.52 (p,  $J$  = 8.8 Hz, 1H), 2.38–2.26 (m, 2H), 2.22–2.08 (m, 2H), 2.07–1.93 (m, 1H), 1.91–1.77 (m, 1H), 1.32 (s, 9H).

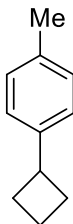

**1-Cyclobutyl-4-methylbenzene.** The title compound was prepared by the reduction of 1-(p-tolyl)cyclobutan-1-ol<sup>16</sup> (4.1 g, 25 mmol) as outlined in General Procedure 1. The cyclobutane was purified by Kugelrohr distillation (65 °C at 0.5 mmHg). This procedure afforded the title compound (659 mg, 18%) as a colorless oil: <sup>1</sup>H NMR (500 MHz, CDCl<sub>3</sub>) δ 7.24–7.17 (m, 4H), 3.60 (p, *J* = 8.7 Hz, 1H), 2.49–2.36 (m, 5H), 2.28–2.17 (m, 2H), 2.14–2.03 (m, 1H), 2.00–1.89 (m, 1H); <sup>13</sup>C NMR (126 MHz, CDCl<sub>3</sub>) δ 143.4, 135.2, 129.0, 126.3, 40.2, 30.1, 21.1, 18.4; IR (neat) 2972, 2937, 2862, 1513, 1444, 1243, 1118. 811, 724 cm<sup>-1</sup>. MS (APCI+) 147.11736 (147.11683 calcd for C<sub>11</sub>H<sub>15</sub>, M + H<sup>+</sup>).

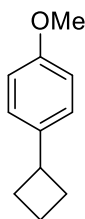

**1-cyclobutyl-4-methoxybenzene.** The title compound was prepared by the reduction of 1-(4-methoxyphenyl)cyclobutan-1-ol<sup>16</sup> (4.5 g, 25 mmol) as outlined in General Procedure 1. The cyclobutane was purified by Kugelrohr distillation (82-83 °C at 0.5 mmHg). This procedure afforded the title compound (3.05 g, 75%) as a colorless oil. The spectrum was consistent with previously reported <sup>1</sup>H NMR spectra<sup>17</sup>: <sup>1</sup>H NMR (500 MHz, CDCl<sub>3</sub>) δ 7.17–7.13 (m, 2H), 6.87–6.82 (m, 2H), 3.79 (s, 3H), 3.54–3.42 (m, 1H), 2.35–2.27 (m, 2H),

2.15–2.04 (m, 2H), 2.04–1.92 (m, 1H), 1.88–1.78 (m, 1H).

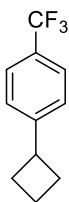

**1-cyclobutyl-4-(trifluoromethyl)benzene.** The title compound was prepared by the reduction of 1-(4-(trifluoromethyl)phenyl)cyclobutan-1-ol<sup>18</sup> (5.40 g, 25 mmol) as outlined in General Procedure 1. The cyclobutane was purified by Kugelrohr distillation (46 °C at 0.5 mmHg). This procedure afforded the title compound (1.0 g, 20%) as a colorless oil. The spectrum was consistent with previously reported <sup>1</sup>H NMR spectra<sup>19</sup>: <sup>1</sup>H NMR (500 MHz, CDCl<sub>3</sub>) δ 7.54 (d, *J* = 8.7 Hz, 2H), 7.31 (d, *J* = 8.7 Hz, 2H), 3.60 (p, *J* = 8.7 Hz, 1H), 2.44–2.33 (m, 2H), 2.21–2.11 (m, 2H), 2.11–2.00 (m, 1H), 1.92–1.84 (m, 1H).

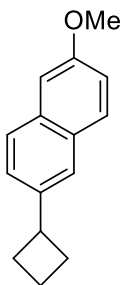

**2-cyclobutyl-6-methoxynaphthalene.** 1-(6-methoxynaphthalen-2-yl)cyclobutan-1-ol (10.0 g, 88% yield, mp 90–91 °C) was prepared by the addition of (6-methoxynaphthalen-2-yl)magnesium bromide to cyclobutanone using General Procedure 1, Part A. <sup>1</sup>H NMR (600 MHz, C<sub>6</sub>D<sub>6</sub>) δ 7.77 (s, 1H), 7.62 (t, *J* = 9.9 Hz, 2H), 7.54 (d, *J* = 8.9 Hz, 1H), 7.21 (d, *J* = 8.8 Hz, 1H), 6.96 (s, 1H), 3.41 (s, 3H), 2.54–2.45 (m, 2H), 2.39–2.27 (m, 3H), 1.96–1.86 (m, 1H), 1.63–1.53 (m, 1H); <sup>13</sup>C NMR (151 MHz, C<sub>6</sub>D<sub>6</sub>) δ 158.2, 142.1, 134.3, 130.1,

129.1, 127.5, 125.1, 123.4, 119.3, 106.0, 77.0, 54.8, 37.2, 13.5; IR (neat) 3365, 2975, 2938, 1629, 1605, 1484, 1501, 1451, 1386, 1264, 1241, 1176, 1147, 1131, 1112, 1024, 955, 923, 907,  $\text{cm}^{-1}$ . MS (APCI+) 227.10699 (227.10666 calcd for  $\text{C}_{15}\text{H}_{15}\text{O}_2$ ,  $\text{M} + \text{H}^+ - \text{H}_2$ ). The title compound was prepared by the reduction of 1-(6-methoxynaphthalen-2-yl)cyclobutan-1-ol (5.71 g, 25 mmol) as outlined in General Procedure 1, Part B. The cyclobutane was purified by eluting the crude material through a plug of silica using hexanes. This procedure afforded the title compound (2.1 g, 41%) as a colorless solid, mp 64–65 °C:  $^1\text{H}$  NMR (600 MHz,  $\text{C}_6\text{D}_6$ )  $\delta$  7.57 (d,  $J = 8.4$  Hz, 1H), 7.50 (d,  $J = 8.9$  Hz, 1H), 7.44 (s, 1H), 7.23 (dd,  $J = 8.4, 1.7$  Hz, 1H), 7.17 (dd,  $J = 8.9, 2.5$  Hz, 1H), 6.92 (d,  $J = 2.5$  Hz, 1H), 3.46 (p,  $J = 8.8$  Hz, 1H), 3.36 (s, 3H), 2.20 (qt,  $J = 8.2, 2.3$  Hz, 2H), 2.09 (pd,  $J = 9.4, 2.5$  Hz, 2H), 1.89–1.79 (m, 1H), 1.76–1.68 (m, 1H);  $^{13}\text{C}$  NMR (151 MHz,  $\text{C}_6\text{D}_6$ )  $\delta$  157.8, 141.5, 133.8, 129.7, 129.5, 127.2, 126.2, 124.6, 119.2, 106.0, 54.8, 40.8, 30.1, 18.7; IR (neat) 3008, 2961, 2938, 2886, 2861, 1630, 1601, 1483, 1461, 1388, 1352, 1260, 1202, 1162, 1117, 1029, 934, 881, 910, 815  $\text{cm}^{-1}$ . MS (APCI+) 211.11202 (211.11174 calcd for  $\text{C}_{15}\text{H}_{15}\text{O}$ ,  $\text{M} + \text{H}^+ - \text{H}_2$ ).

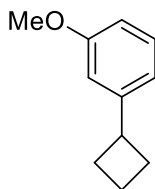

**1-Cyclobutyl-3-methoxybenzene.** The title compound was prepared by the reduction of 1-(3-methoxyphenyl)cyclobutan-1-ol<sup>20</sup> (4.46 g, 25 mmol) as outlined in General Procedure 1. The cyclobutane was purified by Kugelrohr distillation (80 °C at 0.5 mmHg). This procedure afforded the title compound (1.14 g, 28%) as a colorless oil. The spectrum

was consistent with previously reported  $^1\text{H}$  NMR spectra<sup>21</sup>:  $^1\text{H}$  NMR (600 MHz,  $\text{CDCl}_3$ )  $\delta$  7.22 (t,  $J$  = 7.9 Hz, 1H), 6.84–6.80 (m, 1H), 6.78 (t,  $J$  = 1.9 Hz, 1H), 6.72 (dd,  $J$  = 7.9, 2.9, 1H), 3.81 (s, 3H), 3.56–3.49 (m, 1H), 2.37–2.30 (m, 2H), 2.19–2.10 (m, 2H), 2.05–1.96 (m, 1H), and 1.88–1.81 (m, 1H).

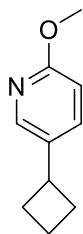

### 5-cyclobutyl-2-methoxypyridine

A three-necked round bottom flask was charged with freshly ground magnesium turnings (540 mg, 1.00 equiv, 22.2 mmol), dry THF (62 mL), and a magnetic stirbar. Bromocyclobutane (3.09 g, 1.03 equiv, 22.9 mmol) was added dropwise to the stirring mixture as a neat liquid. The flask was heated at reflux for 16 h, which resulted in the near-complete reaction of magnesium to form a clear emerald green solution. At this stage, the mixture was cooled to  $-78^\circ\text{C}$  using a bath of dry ice/acetone, and a solution of anhydrous zinc(II) bromide (5.00 g, 1.00 equiv, 22.2 mmol) in tetrahydrofuran (19.6 mL, 1.13 M) was added by syringe. The flask was removed from the cooling bath and after stirring at room temperature for 18 h, the mixture was diluted with an additional 35.0 mL THF. 5-bromo-2-methoxypyridine (2.09 g, 1.00 equiv, 11.1 mmol) was then added, followed by [1,1'-bis(diphenylphosphino)ferrocene]dichloropalladium(II) (812 mg, 10.0 mol%, 1.11 mmol). The mixture was heated at reflux for 16 h. Then it was filtered through silica gel (30 g), washing with additional diethyl ether (400 mL). Concentration of the filtrate gave 2.2 g of crude product as a turbid red oil. Kugelrohr distillation (air

bath temperature 97 °C at 0.6 mmHg) afforded 1.34 g of pure 5-cyclobutyl-2-methoxypyridine (74% yield). The <sup>1</sup>H NMR spectrum was consistent with previously reported data<sup>12</sup>: <sup>1</sup>H NMR (600 MHz, Chloroform-d) δ 7.95 (s, 1H), 7.44 (dd, 1H), 6.67 (d, 1H), 3.88 (s, 3H), 3.56 – 3.37 (m, 1H), 2.38 – 2.23 (m, 2H), 2.14 – 1.89 (m, 3H), 1.90 – 1.77 (m, 1H).

## General Procedure 2 for C–H Functionalization Reactions.

An oven-dried vial was equipped with magnetic stir bar and sealed with septa and cap. This was cooled under vacuum, and then flame-dried once. After cooling to room temperature, the vial was loaded with rhodium catalyst (0.5-1 mol%), the indicated quantity of the cyclobutane substrate, and anhydrous solvent (2.0 mL solvent / 1.0 mmol cyclobutane). The mixture was allowed to stir under argon (the mixture was heated if heat was applied) while the diazo compound was prepared. A solution of the diazo compound was prepared by dissolving in the indicated solvent (3 mL solvent / 0.25 mmol diazo compound) and then this mixture was added dropwise by syringe pump over 3 h. Upon completion of the addition, the reaction was stirred an additional 2-4 h. Residual solvent was removed under reduced pressure (if the reaction was heated, it was allowed to come to room temperature before removing residual solvent), and the crude product was purified by silica gel chromatography.

## Procedure for Analyzing Reaction Mixtures during Catalyst Screen

Reactions were conducted according to General Procedure 2 using 3 equiv. of the 1-(*tert*-butyl)-4-cyclobutylbenzene. The d at 3.62 ppm is represented by the *cis* secondary distal functionalization for compound **A**. The s at 3.99 ppm is represented by the tertiary functionalization for compound **B**. The d at 3.89 ppm is represented by the *trans* secondary distal functionalization for compound **C**. The enantioselectivity was determined by HPLC analysis of the material after flash chromatography.

**Scheme S2.** The reaction of 4-tert-butylphenyl cyclobutane to generate **A** and **B**.

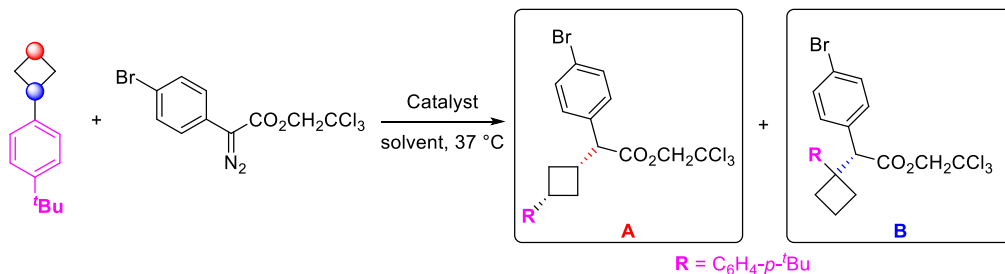

**Figure S2.** Comparison of crude <sup>1</sup>H NMR spectra for C–H Functionalization of Cyclobutanes with Different Catalysts.

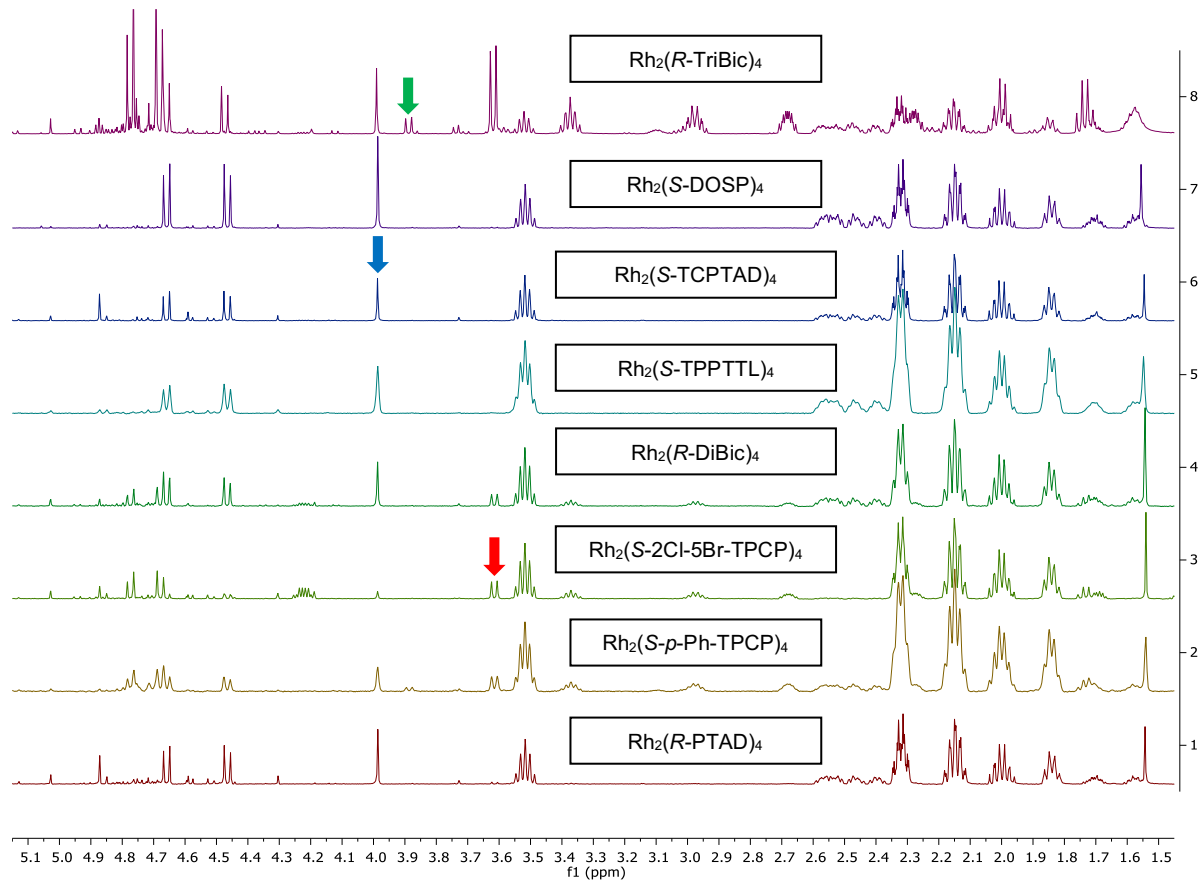

(Ratio determined by comparing s at 3.99 ppm (3° C-H insertion product), d at 3.62 (cis-C3 insertion product), and d at 3.89 ppm (trans-C3 insertion product).

**Figure S3.** Crude NMR Spectrum using  $\text{Rh}_2(\text{S-DOSP})_4$  as the catalyst.

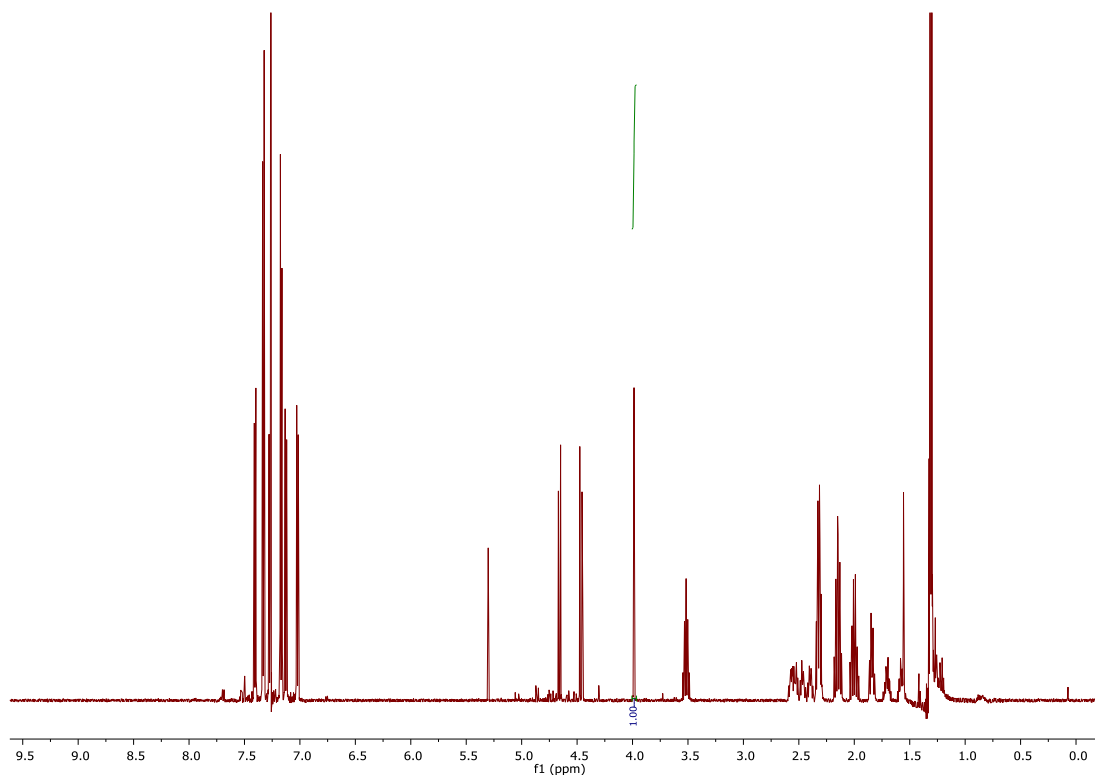

**Figure S4.** Crude NMR Spectrum using  $\text{Rh}_2(\text{S-TCPTAD})_4$  as the catalyst.

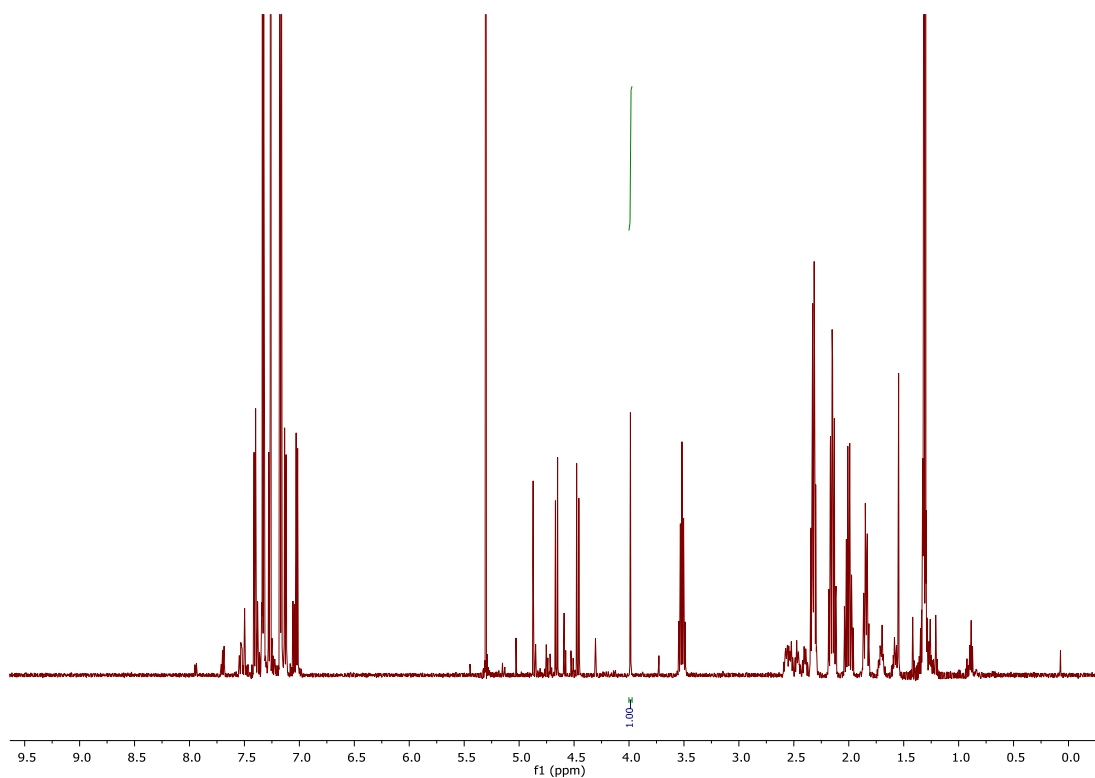

**Figure S5.** Crude NMR spectrum using  $\text{Rh}_2(\text{S-TPPTTL})_4$  as the catalyst.

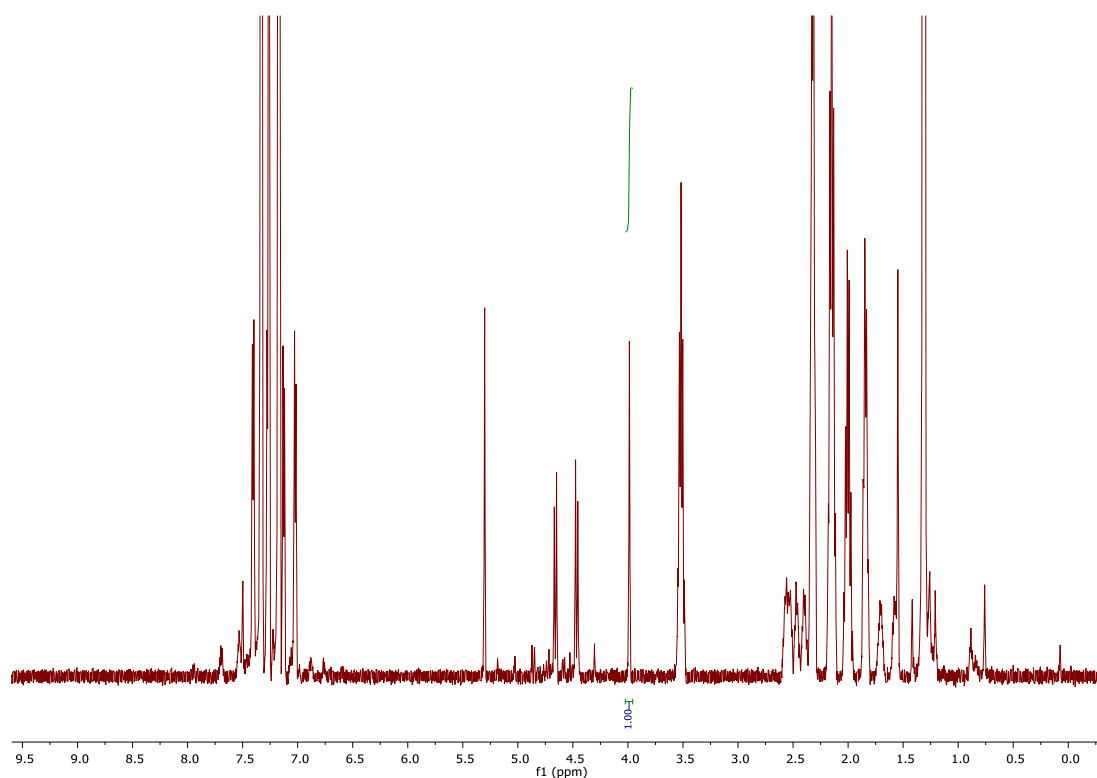

**Figure S6.** Crude NMR spectrum using  $\text{Rh}_2(\text{R-DiBic})_4$  as the catalyst.

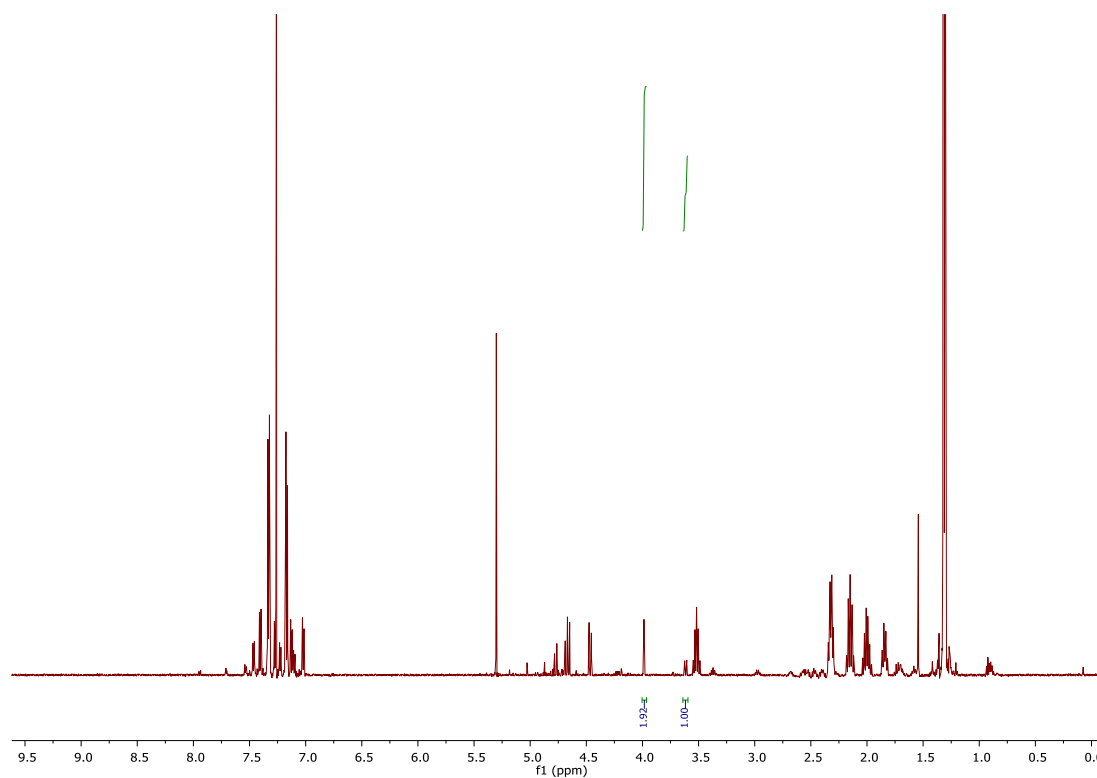

**Figure S7.** Crude NMR spectrum using  $\text{Rh}_2(\text{S-2-Cl-5-BrTPCP})_4$  as the catalyst.

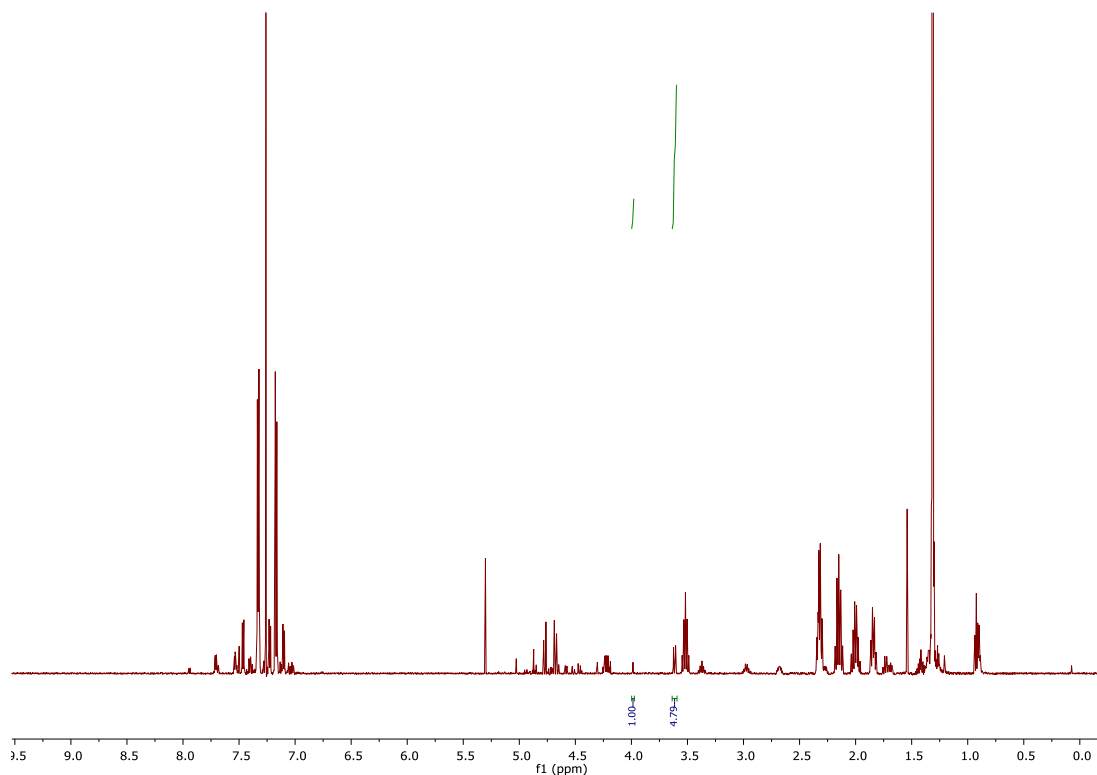

**Figure S8.** Crude NMR spectrum using  $\text{Rh}_2(\text{S-2-Cl-5-BrTPCP})_4$  as the catalyst.

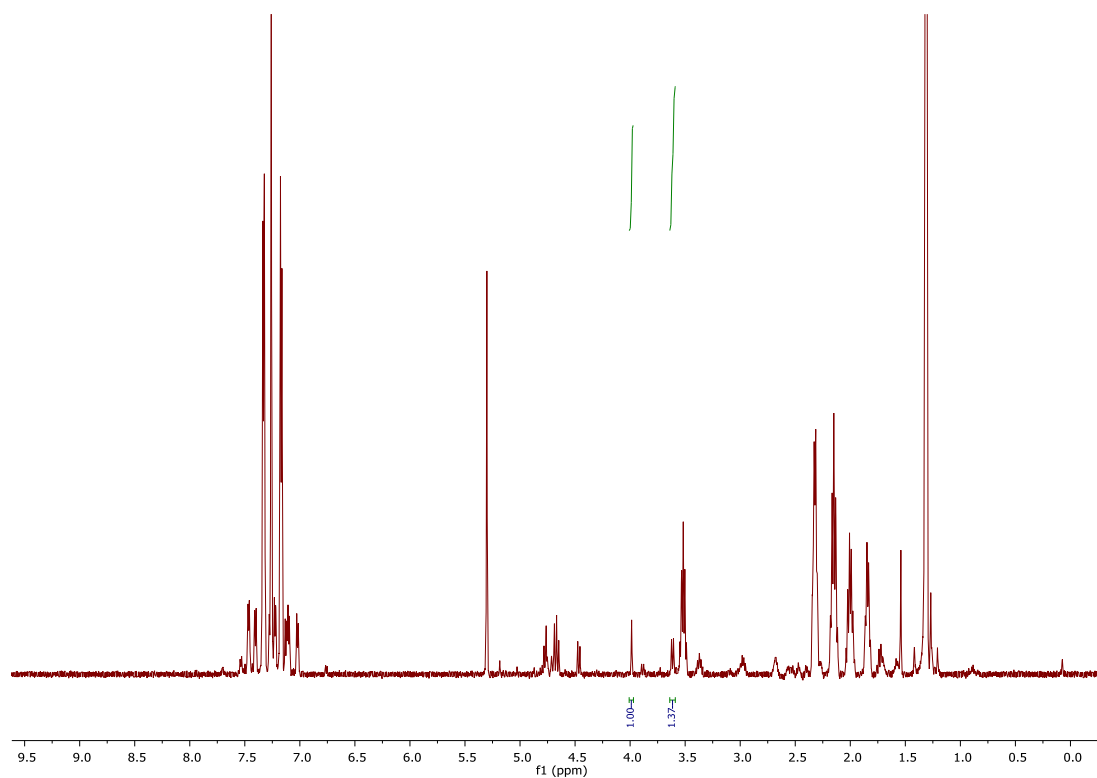

**Figure S9.** Crude NMR spectrum using  $\text{Rh}_2(R\text{-PTAD})_4$  as the catalyst.

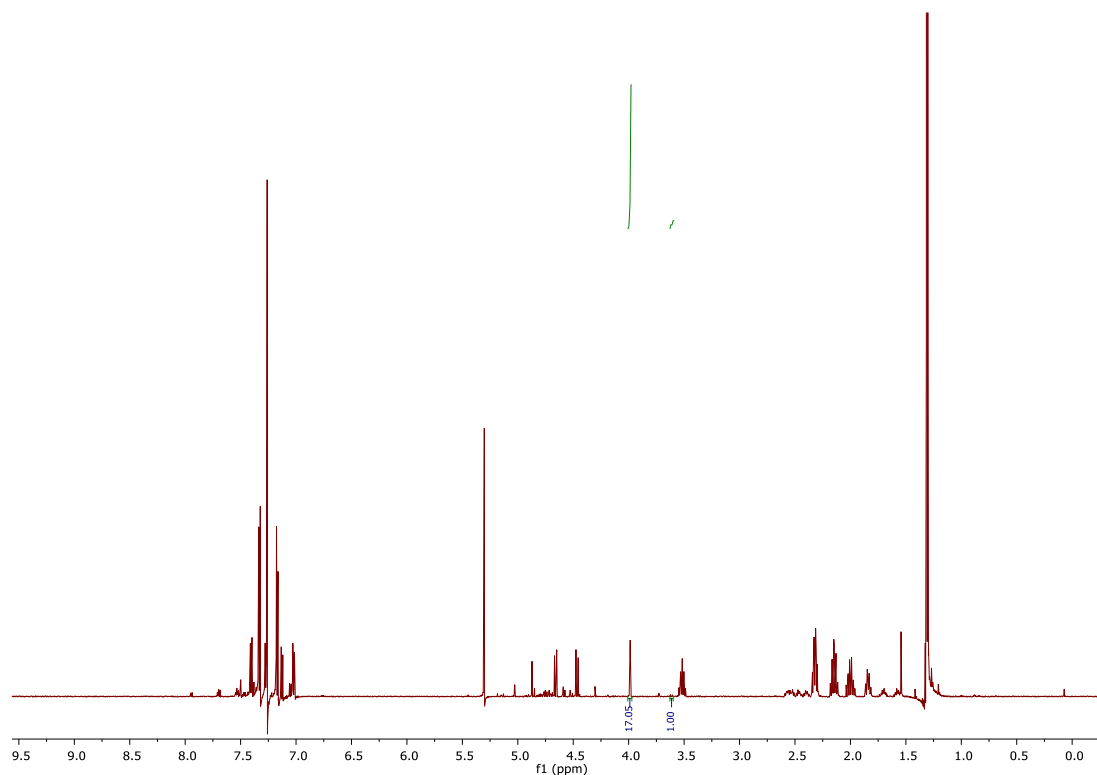

**Figure S10.** Crude NMR spectrum using  $\text{Rh}_2(R\text{-TriBic})_4$  as the catalyst.

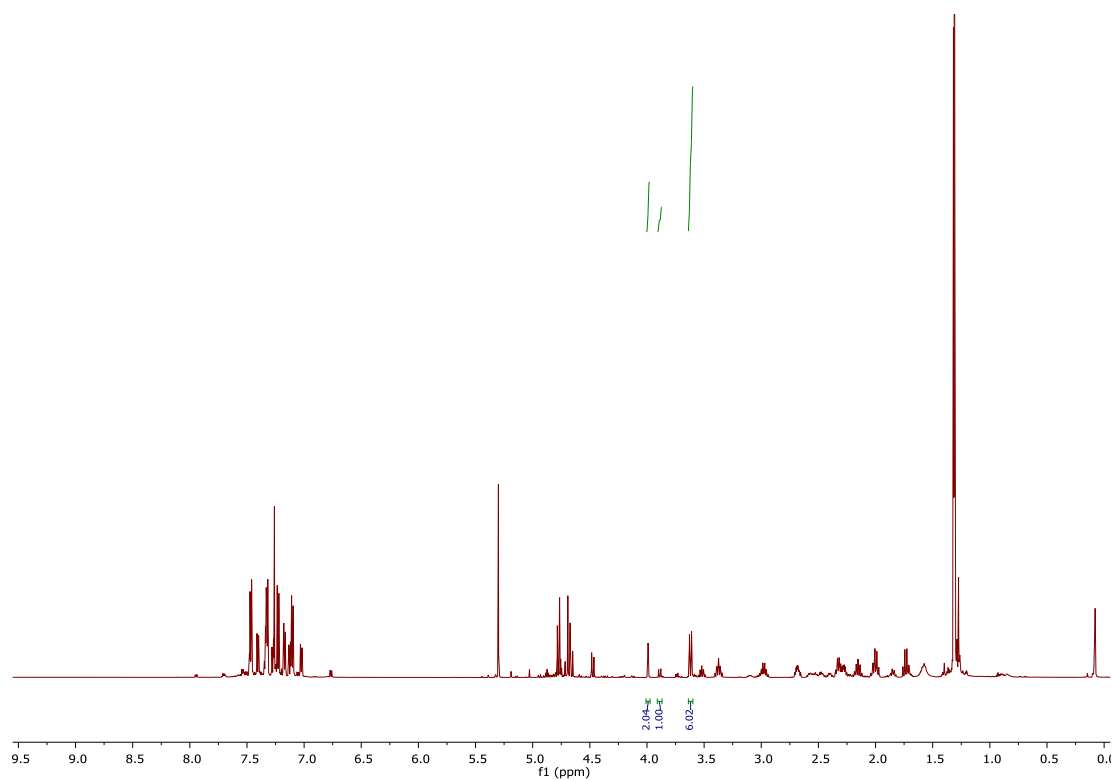

## HPLC Traces Generated During Catalyst Screen

**Figure S11.** Chiral HPLC trace using  $\text{Rh}_2(R/S\text{-}2\text{-Cl-TPCP})_4$  as the catalyst.

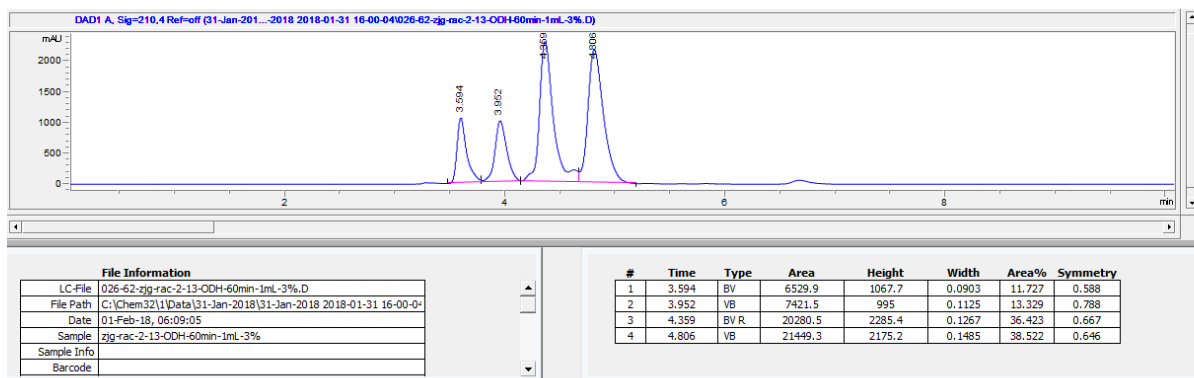

**Figure S12.** Chiral HPLC trace using  $\text{Rh}_2(R/S\text{-TCPTAD})_4$  as the catalyst.

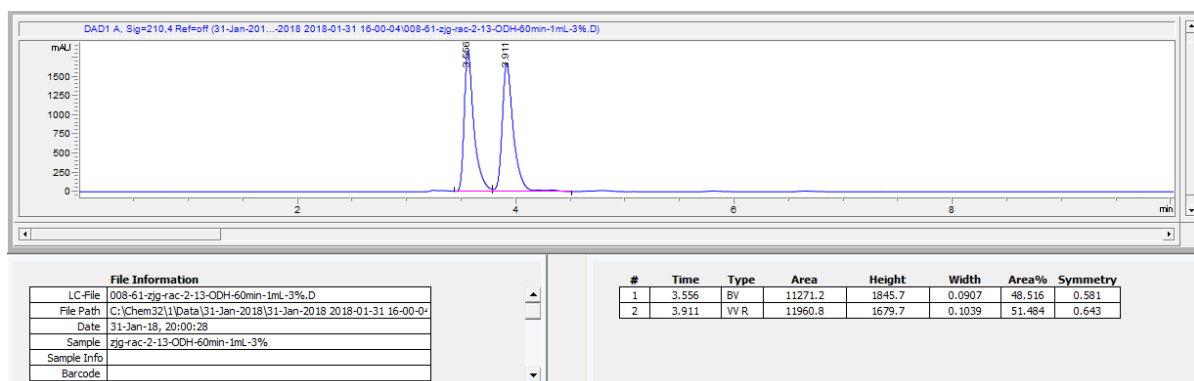

**Figure S13.** Chiral HPLC trace using  $\text{Rh}_2(S\text{-DOSP})_4$  as the catalyst.

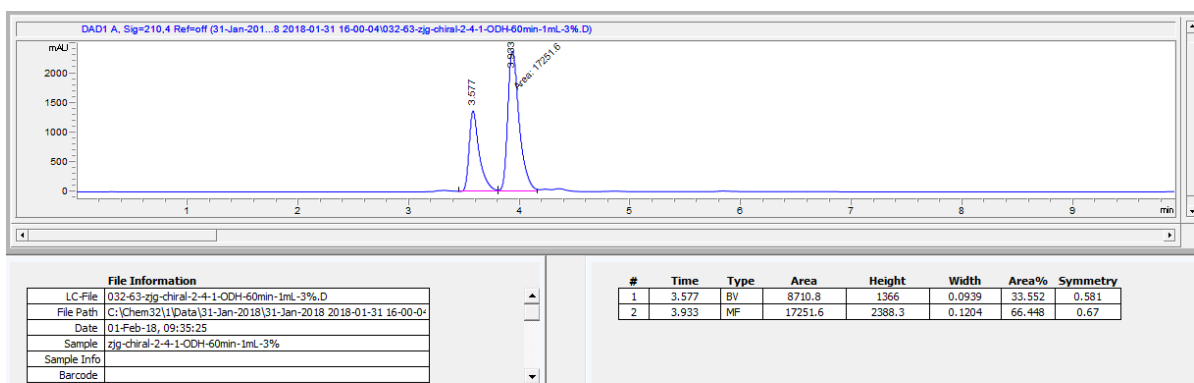

**Figure S14.** Chiral HPLC trace using  $\text{Rh}_2(\text{S-TCPTAD})_4$  as the catalyst.

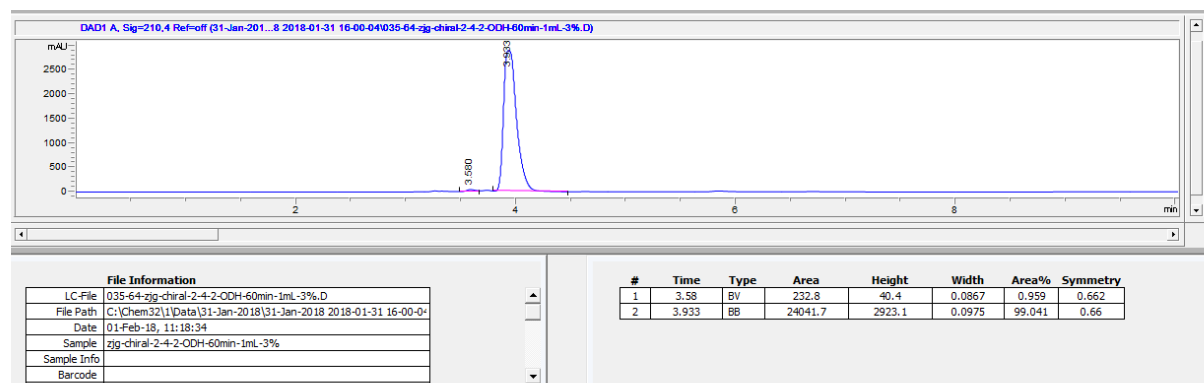

**Figure S15.** Chiral HPLC trace using  $\text{Rh}_2(\text{S-TPPTTL})_4$  as the catalyst.

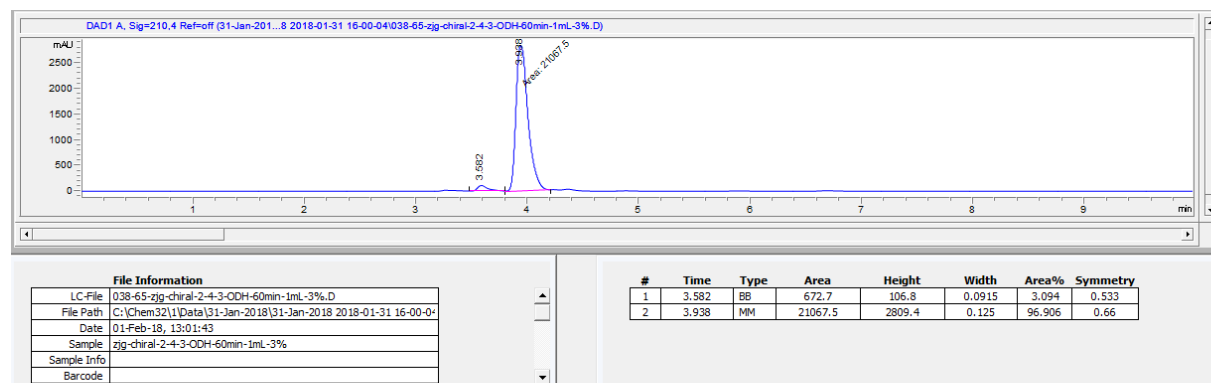

**Figure S16.** Chiral HPLC trace using  $\text{Rh}_2(\text{R-DiBic})_4$  as the catalyst.

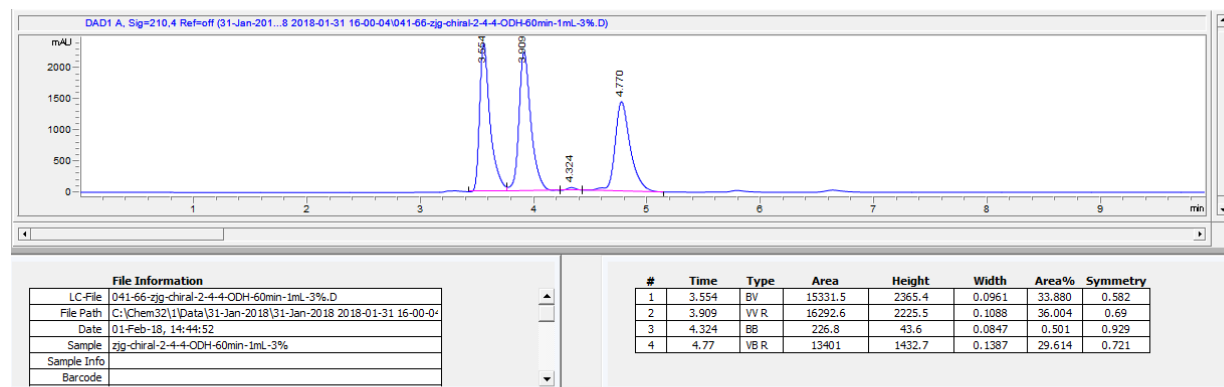

**Figure S17.** Chiral HPLC trace using  $\text{Rh}_2(\text{S-2-Cl-5-BrTPCP})_4$  as the catalyst.

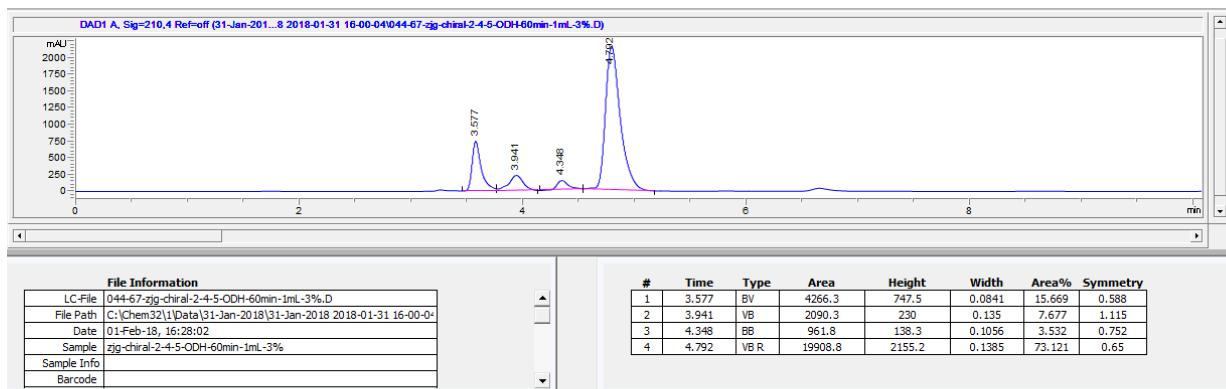

**Figure S18.** Chiral HPLC trace using  $\text{Rh}_2(\text{S-p-PhTPCP})_4$  as the catalyst.

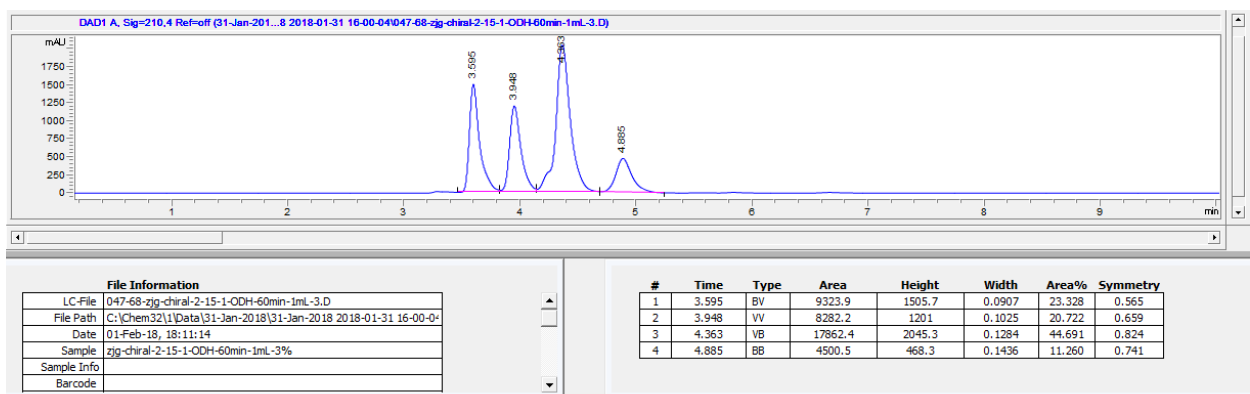

**Figure S19.** Chiral HPLC trace using  $\text{Rh}_2(\text{R-PTAD})_4$  as the catalyst.

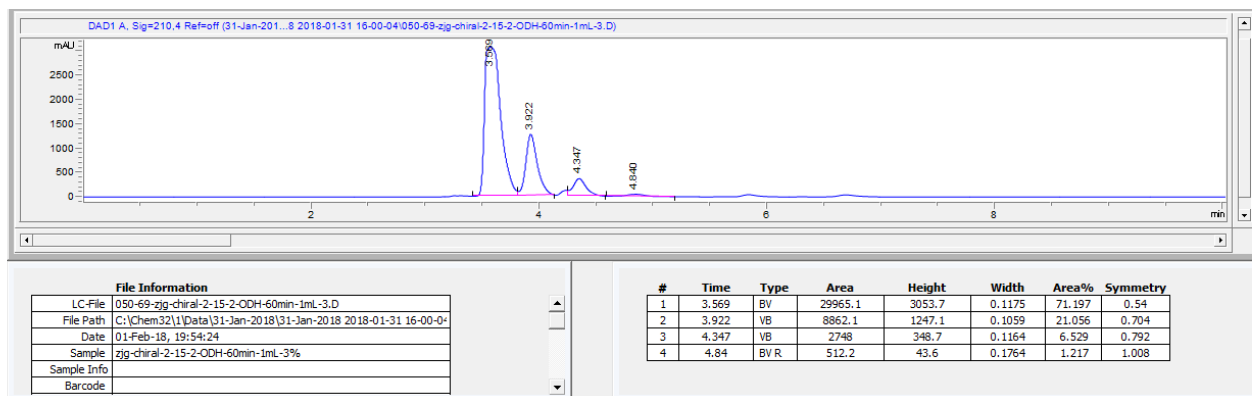

**Figure S20.** Chiral HPLC trace using  $\text{Rh}_2(\text{R-TriBic})_4$  as the catalyst.

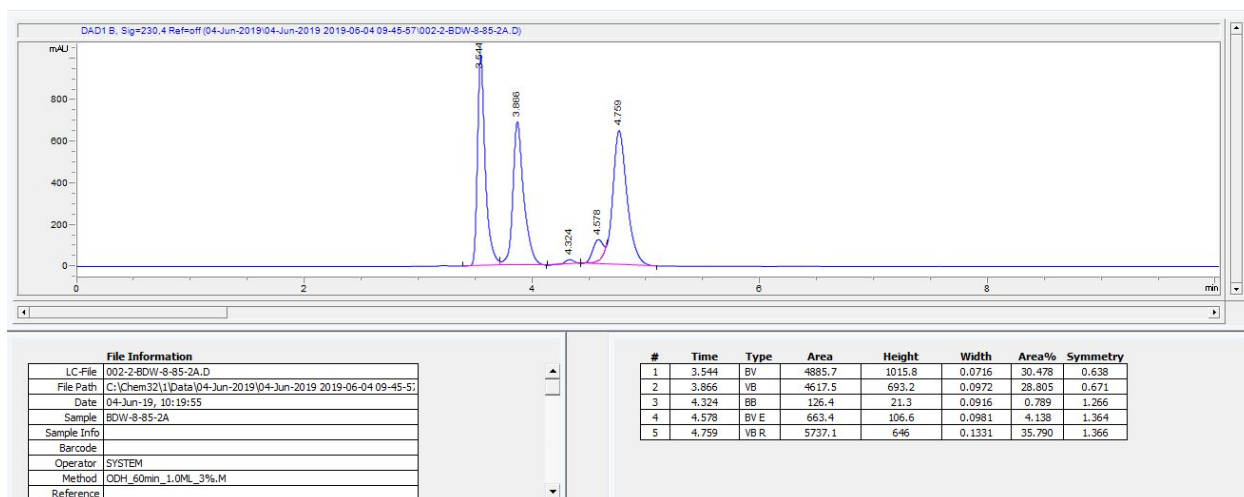

## Compound Characterization for C1 Functionalization of Substituted Cyclobutanes

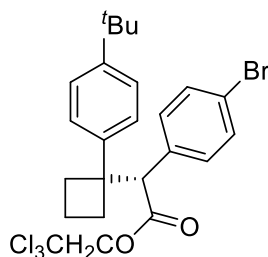

**2,2,2-Trichloroethyl** **(S)-2-(4-bromophenyl)-2-(1-(4-(*tert*-butyl)phenyl)cyclobutyl)acetate (8).** The general procedure 2 was employed for the C–H functionalization of 1-(*tert*-butyl)-4-cyclobutylbenzene (47 mg, 0.25 mmol, 1.00 equiv) by reaction of 2,2,2-trichloroethyl 2-(4-bromophenyl)-2-diazoacetate (186 mg, 0.50 mmol, 2.00 equiv) using  $\text{Rh}_2(\text{R-TCPTAD})_4$  (5.3 mg, 1 mol%) as catalyst. This procedure afforded the title compound (103 mg, 78%) as a colorless solid, mp 70–73 °C:  $[\alpha]_{\text{D}}^{23} -10.1$  (*c* 1.00,  $\text{CHCl}_3$ );  $^1\text{H}$  NMR (400 MHz,  $\text{CDCl}_3$ )  $\delta$  7.44 (d, *J* = 8.3 Hz, 2H), 7.24 (d, *J* = 8.4 Hz, 2H), 4.78 (d, *J* = 12.0 Hz, 1H), 4.63 (d, *J* = 12.0 Hz, 1H), 3.46 (d, *J* = 10.6 Hz, 1H), 2.92–2.75 (m, 1H), 1.36–1.27 (m, 1H), 0.91–0.78 (m, 2H), 0.52 (dd, *J* = 14.3, 10.8 Hz, 1H), 0.28 (s, 3H), 0.27 (s, 2H).;  $^{13}\text{C}$  NMR (125 MHz,  $\text{CDCl}_3$ )  $\delta$  140.9, 140.4, 139.7, 138.3, 136.4, 129.6, 129.0, 128.6, 128.6, 128.1, 127.5, 127.5, 127.4, 127.2, 127.1, 60.5, 57.2, 50.1, 45.8, 40.46, 38.87, 31.0, 23.0, 1 carbon signal is missing due to incidental equivalence; IR (neat) 1488, 1452, 1332, 1153, 1137  $\text{cm}^{-1}$ . MS (ESI+) 511.2413 (511.2414 calcd for  $\text{C}_{32}\text{H}_{34}\text{N}_2\text{O}_2\text{S}$ ,  $\text{M} + \text{H}^+$ ). The enantiopurity was determined to be 98% ee by chiral HPLC analysis (Chiralcel ODH, 15 cm x 4.6 mm, 7% IPA/Hexanes, 1.00 mL/min,  $\lambda$  254 nm, RT= 16.5 and 29.7 min).

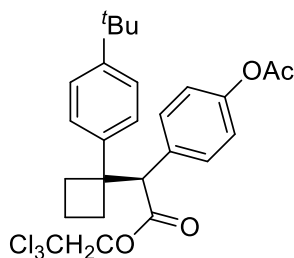

## 2,2,2-Trichloroethyl

## (*R*)-2-(4-acetoxyphe-nyl)-2-(1-(4-(*tert*-

**butyl)phenyl)cyclobutyl)acetate (10).** The general procedure 2 was employed for the C–H functionalization of 1-(*tert*-butyl)-4-cyclobutylbenzene (47 mg, 0.25 mmol) by reaction of 2,2,2-trichloroethyl 2-(4-acetoxyphe-nyl)-2-diazoacetate (176 mg, 0.50 mmol) using  $\text{Rh}_2(R\text{-TCPTAD})_4$  (5.3 mg, 1 mol%) as catalyst. This procedure afforded the title compound (125 mg, 98%) as a colorless solid, mp 70–73 °C:  $[\alpha]^{23}_{\text{D}} +6.9$  ( $c$  1.0,  $\text{CH}_2\text{Cl}_2$ );  $^1\text{H}$  NMR (600 MHz,  $\text{CDCl}_3$ )  $\delta$  7.31–7.29 (m, 2H), 7.29–7.26 (m, 2H), 7.06–7.04 (m, 2H), 7.04–7.01 (m, 2H), 4.67 (d,  $J$  = 11.9 Hz, 1H), 4.41 (d,  $J$  = 11.9 Hz, 1H), 4.01 (s, 1H), 2.63–2.52 (m, 2H), 2.52–2.44 (m 1H), 2.42–2.34 (m, 1H), 2.30 (s, 3H), 1.73–1.64 (m, 1H), 1.58–1.48 (m, 1H), 1.30 (s, 9H);  $^{13}\text{C}$  NMR (151 MHz,  $\text{CDCl}_3$ )  $\delta$  170.7, 169.4, 150.4, 149.1, 143.7, 132.8, 131.1, 127.1, 124.7, 121.1, 94.7, 74.4, 60.4, 49.4, 34.5, 32.3, 31.6, 30.4, 21.3, 16.1; IR (film) 2962, 2868, 1751, 1506, 1368, 1271, 1198, 1169, 1133, 1049, 1018, 910, 830, 756, 722  $\text{cm}^{-1}$ . MS (APCI-) 509.1066 (509.1059 calcd for  $\text{C}_{26}\text{H}_{28}\text{Cl}_3\text{O}_4$ ,  $\text{M} - \text{H}^+$ ). The enantiopurity was determined to be 96% ee by chiral HPLC analysis (Chiralcel OD-H, 25 cm x 4.6 mm, 2% IPA/Hexanes, 0.25 mL/min,  $\lambda$  230 nm, RT= 25.3 and 27.5 min).

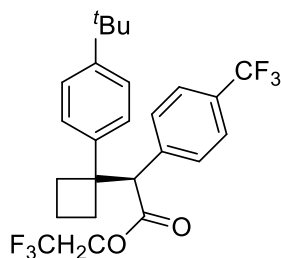

**2,2,2-Trifluoroethyl (R)-2-(1-(4-(*tert*-butyl)phenyl)cyclobutyl)-2-(4-(trifluoromethyl)phenyl)acetate (11).** The general procedure 2 was employed for the C–H functionalization of 1-(*tert*-butyl)-4-cyclobutylbenzene (94 mg, 0.5 mmol) by reaction of 2,2,2-trifluoroethyl 2-diazo-2-(4-(trifluoromethyl)phenyl)acetate (312 mg, 1.0 mmol) using  $\text{Rh}_2(\text{R-TCPTAD})_4$  (5.3 mg, 0.5 mol%) as catalyst. This procedure afforded the title compound (154 mg, 65%) as a colorless solid, mp 59–62 °C:  $[\alpha]^{23}_{\text{D}} -6.6$  (*c* 1.0,  $\text{CH}_2\text{Cl}_2$ );  $^1\text{H}$  NMR (600 MHz,  $\text{CDCl}_3$ )  $\delta$  7.52 (d,  $J$  = 8.1 Hz, 2H), 7.31 (d,  $J$  = 8.2 Hz, 2H), 7.29–7.26 (m, 2H), 6.97–6.94 (m, 2H), 4.37 (dq,  $J$  = 12.6, 8.5 Hz, 1H), 4.24 (dq,  $J$  = 12.6, 8.4 Hz, 1H), 4.05 (s, 1H), 2.59–2.53 (m, 1H), 2.53–2.39 (m, 3H), 1.78–1.68 (m, 1H), 1.66–1.56 (m, 1H), 1.31 (s, 9H);  $^{13}\text{C}$  NMR (151 MHz,  $\text{CDCl}_3$ )  $\delta$  170.4, 149.5, 142.7, 139.1, 130.4, 130.0 (q,  $J$  = 33 Hz), 127.0, 124.9 (q,  $J$  = 3.8 Hz), 124.8, 124.3 (q,  $J$  = 272 Hz), 122.9 (q,  $J$  = 277 Hz), 60.5, 60.5 (q,  $J$  = 37 Hz), 49.7, 34.6, 32.0, 31.5, 30.9, 16.0;  $^{19}\text{F}$  NMR (282 MHz,  $\text{CDCl}_3$ )  $\delta$  -62.55, -73.57 (t,  $J$  = 8.5 Hz); IR (film) 2965, 1754, 1619, 1509, 1325, 1275, 1164, 1124, 1070, 1019, 980, 837  $\text{cm}^{-1}$ . MS (APCI-) 471.1763 (471.1764 calcd for  $\text{C}_{25}\text{H}_{25}\text{O}_2\text{F}_6$ ,  $\text{M} - \text{H}^+$ ). The enantiopurity was determined to be 96% ee by chiral HPLC analysis (Chiralcel OD-H, 25 cm x 4.6 mm, 2% IPA/Hexanes, 0.25 mL/min,  $\lambda$  230 nm, RT= 15.3 and 17.8 min).

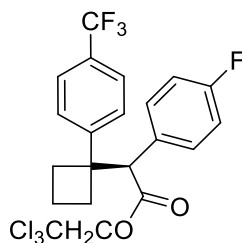

**2,2,2-Trichloroethyl (R)-2-(4-fluorophenyl)-2-(1-(4-(trifluoromethyl)phenyl)-cyclobutyl)acetate (12).** The general procedure 2 was employed for the C–H functionalization of 1-cyclobutyl-4-(trifluoromethyl)benzene (50 mg, 0.25 mmol) by reaction of 2,2,2-trichloroethyl 2-diazo-2-(4-fluorophenyl)acetate (156 mg, 0.50 mmol) using  $\text{Rh}_2(\text{R-TCPTAD})_4$  (5.3 mg, 1 mol%) as catalyst. This procedure afforded the title compound (90 mg, 74%) as a colorless oil:  $[\alpha]_D^{23} +3.5$  (c 1.00,  $\text{CHCl}_3$ );  $^1\text{H}$  NMR (600 MHz,  $\text{CDCl}_3$ )  $\delta$  7.54–7.47 (m, 2H), 7.21–7.12 (m, 4H), 7.03–6.94 (m, 2H), 4.72 (d,  $J = 12.0$  Hz, 1H), 4.51 (d,  $J = 12.0$  Hz, 1H), 4.06 (s, 1H), 2.73–2.54 (m, 2H), 2.51–2.37 (m, 2H), 1.83–1.64 (m, 2H);  $^{13}\text{C}$  NMR (75 MHz,  $\text{CDCl}_3$ )  $\delta$  170.4, 164.3 (d,  $J = 247$  Hz), 150.6, 131.6 (d,  $J = 8.1$  Hz), 130.3 (d,  $J = 3.4$  Hz), 128.6 (q,  $J = 32.8$  Hz), 128.1, 124.3 (q,  $J = 272$  Hz), 124.65 (q,  $J = 3.8$  Hz), 115.2 (d,  $J = 21.5$  Hz), 94.6, 74.3, 59.5, 49.7, 32.2, 31.4, 16.1;  $^{19}\text{F}$  NMR (282 MHz,  $\text{CDCl}_3$ )  $\delta$  -62.34, -114.20, -114.33 (m); IR (film) 3046, 2983, 2950, 2869, 1749, 1618, 1606, 1508, 1325, 1228, 1162, 1124, 1114, 1071, 1015, 908, 842, 720  $\text{cm}^{-1}$ . MS (ESI-) 516.9926 (516.9924 calcd for  $\text{C}_{21}\text{H}_{17}\text{O}_2\text{Cl}_4\text{F}_4$ ,  $\text{M} + \text{Cl}^-$ ). The enantiopurity was determined to be 96% ee by chiral HPLC (Chiralpak IAU 1.6  $\mu\text{m}$ , 100 mm x 3 mm, 0.5% IPA/Hexanes, 0.5 mL/min,  $\lambda$  230 nm, RT= 1.93 and 2.14 min).

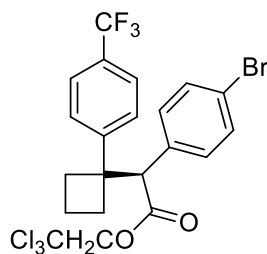

## 2,2,2-Trichloroethyl

## (*R*)-2-(4-bromophenyl)-2-(1-(4-

(trifluoromethyl)phenyl)cyclobutyl)acetate (**13**). The general procedure 2 was employed for the C–H functionalization of 1-cyclobutyl-4-(trifluoromethyl)benzene (50 mg, 0.25 mmol) by reaction of 2,2,2-trichloroethyl 2-(4-bromophenyl)-2-diazoacetate (186 mg, 0.50 mmol) using  $\text{Rh}_2(\text{R-TCPTAD})_4$  (5.3 mg, 1 mol%) as catalyst. This procedure afforded the title compound (114 mg, 84%) as a colorless oil:  $[\alpha]_D^{23} -12.7$  ( $c$  1.0,  $\text{CH}_2\text{Cl}_2$ );  $^1\text{H}$  NMR (600 MHz,  $\text{CDCl}_3$ )  $\delta$  7.51 (d,  $J$  = 8.1 Hz, 2H), 7.42–7.39 (m, 2H), 7.17 (d,  $J$  = 8.1 Hz, 2H), 7.07–7.04 (m, 2H), 4.71 (d,  $J$  = 12.0 Hz, 1H), 4.51 (d,  $J$  = 12.0 Hz, 1H), 4.05 (s, 1H), 2.69–2.62 (m, 1H), 2.61–2.55 (m, 1H), 2.48–2.40 (m, 2H), 1.80–1.67 (m, 2H);  $^{13}\text{C}$  NMR (151 MHz,  $\text{CDCl}_3$ )  $\delta$  170.2, 150.4, 133.6, 131.7, 131.4, 128.7 (q,  $J$  = 33 Hz), 128.2, 124.7 (q,  $J$  = 3.7 Hz), 124.3 (q,  $J$  = 272 Hz), 122.4, 94.6, 74.4, 59.8, 49.7, 32.3, 31.5, 16.1;  $^{19}\text{F}$  NMR (282 MHz,  $\text{CDCl}_3$ )  $\delta$  -62.36; IR (film) 2950, 1750, 1618, 1489, 1410, 1325, 1164, 1124, 1071, 1012, 836, 762, 722  $\text{cm}^{-1}$ . MS (APCI-) 540.9355 (540.9357 calcd for  $\text{C}_{21}\text{H}_{16}\text{O}_2\text{BrCl}_3\text{F}_3$ ,  $\text{M} - \text{H}^+$ ). The enantiopurity was determined to be 98% ee by chiral HPLC analysis (Chiralpak AD-H, 25 cm x 4.6 mm, 2% IPA/Hexanes, 0.5 mL/min,  $\lambda$  210 nm, RT= 9.7 and 10.3 min).

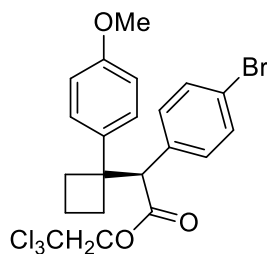

## 2,2,2-Trichloroethyl

## (*R*)-2-(4-bromophenyl)-2-(1-(4-

**methoxyphenyl)cyclobutyl)acetate (14).** The general procedure 2 was employed for the C–H functionalization of 1-cyclobutyl-4-methoxybenzene (41 mg, 0.25 mmol) by reaction of 2,2,2-trichloroethyl 2-(4-bromophenyl)-2-diazoacetate (186 mg, 0.50 mmol) using  $\text{Rh}_2(\text{R-TCPTAD})_4$  (5.3 mg, 1 mol%) as catalyst. This procedure afforded the title compound (102 mg, 81%) as a colorless oil:  $[\alpha]_{\text{D}}^{23} -15.4$  ( $c$  1.0,  $\text{CH}_2\text{Cl}_2$ );  $^1\text{H}$  NMR (600 MHz,  $\text{CDCl}_3$ )  $\delta$  7.40–7.36 (m, 2H), 7.06–7.04 (m, 2H), 6.99–6.95 (m, 2H), 6.80–6.77 (m, 2H), 4.70 (d,  $J = 12.0$  Hz, 1H), 4.55 (d,  $J = 12.0$  Hz, 1H), 4.00 (s, 1H), 3.79 (s, 3H), 2.66–2.60 (m, 1H), 2.53–2.44 (m, 1H), 2.42–2.35 (m, 2H), 1.79–1.64 (m, 2H);  $^{13}\text{C}$  NMR (151 MHz,  $\text{CDCl}_3$ )  $\delta$  170.5, 158.1, 137.9, 134.1, 131.8, 131.1, 128.8, 121.9, 113.1, 94.7, 74.4, 60.5, 55.4, 49.3, 32.3, 31.6, 16.0; IR (film) 2948, 2835, 1748, 1610, 1511, 1488, 1464, 1441, 1409, 1372, 1297, 1245, 1178, 1131, 1075, 1032, 1011, 908, 830, 761, 719  $\text{cm}^{-1}$ . MS (APCI-) 502.9597 (502.9589 calcd for  $\text{C}_{21}\text{H}_{19}\text{O}_3\text{BrCl}_3$ ,  $\text{M} - \text{H}^+$ ). The enantiopurity was determined to be 91% ee by chiral HPLC analysis (Chiralcel ODH, 25 cm x 4.6 mm, 3% IPA/Hexanes, 1.00 mL/min,  $\lambda$  210 nm, RT= 4.7 and 6.0 min).

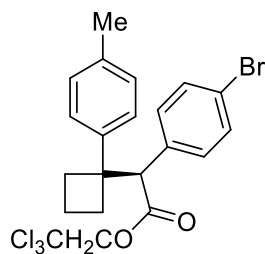

**2,2,2-Trichloroethyl (*R*)-2-(4-bromophenyl)-2-(1-(*p*-tolyl)cyclobutyl)acetate (15).** The general procedure 2 was employed for the C–H functionalization of 1-cyclobutyl-4-methylbenzene (37 mg, 0.25 mmol) by reaction of 2,2,2-trichloroethyl 2-(4-bromophenyl)-2-diazoacetate (186 mg, 0.50 mmol) using  $\text{Rh}_2(\text{R-TCPTAD})_4$  (5.3 mg, 1 mol%) as catalyst. This procedure afforded the title compound (115 mg, 94%) as a colorless oil:  $[\alpha]_D^{23}$  -9.6 (c 1.0,  $\text{CH}_2\text{Cl}_2$ );  $^1\text{H}$  NMR (600 MHz,  $\text{CDCl}_3$ )  $\delta$  7.41–7.38 (m, 2H), 7.11–7.04 (m, 4H), 6.97 (d,  $J$  = 8.2 Hz, 2H), 4.69 (d,  $J$  = 12.0 Hz, 1H), 4.54 (d,  $J$  = 12.0 Hz, 1H), 4.01 (s, 1H), 2.67–2.60 (m, 1H), 2.55–2.49 (m, 1H), 2.46–2.37 (m, 2H), 2.32 (s, 3H), 1.79–1.70 (m, 1H), 1.70–1.63 (m, 1H);  $^{13}\text{C}$  NMR (151 MHz,  $\text{CDCl}_3$ )  $\delta$  170.5, 143.1, 135.9, 134.1, 131.8, 131.1, 128.5, 127.5, 122.0, 94.7, 74.4, 60.4, 49.5, 32.3, 31.3, 21.1, 16.1; IR (film) 2980, 2946, 2866, 1748, 1514, 1488, 1445, 1409, 1371, 1336, 1130, 1075, 1011, 907, 822, 760, 720  $\text{cm}^{-1}$ . MS (APCI-) 486.9645 (486.9640 calcd for  $\text{C}_{21}\text{H}_{19}\text{O}_2\text{BrCl}_3$ ,  $\text{M} - \text{H}^+$ ). The enantiopurity was determined to be 98% ee by chiral HPLC analysis (Chiralcel OJ, 25 cm x 4.6 mm, 2% IPA/Hexanes, 0.5 mL/min,  $\lambda$  210 nm, RT= 10.9 and 13.9 min).

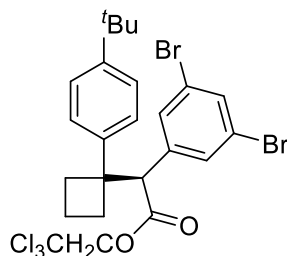

**2,2,2-Trichloroethyl** **(*R*)-2-(1-(4-(*tert*-butyl)phenyl)cyclobutyl)-2-(3,5-dibromophenyl)acetate (16).** The general procedure 2 was employed for the C–H functionalization of 1-(*tert*-butyl)-4-cyclobutylbenzene (47 mg, 0.25 mmol) by reaction of 2,2,2-trichloroethyl 2-diazo-2-(3,5-dibromophenyl)acetate (226 mg, 0.50 mmol) using Rh<sub>2</sub>(*R*-TCPTAD)<sub>4</sub> (5.3 mg, 1 mol%) as catalyst. This procedure afforded the title compound (115 mg, 75%) as a colorless oil: [α]<sub>D</sub><sup>23</sup> -7.3 (*c* 1.0, CH<sub>2</sub>Cl<sub>2</sub>); <sup>1</sup>H NMR (600 MHz, CDCl<sub>3</sub>) δ 7.57 (t, *J* = 1.7 Hz, 1H), 7.30–7.27 (m, 2H), 7.16 (d, *J* = 1.7 Hz, 2H), 6.95–6.93 (m, 2H), 4.73 (d, *J* = 11.9 Hz, 1H), 4.55 (d, *J* = 11.9 Hz, 1H), 3.96 (s, 1H), 2.69–2.62 (m, 1H), 2.50–2.42 (m, 3H), 1.83–1.72 (m, 2H), 1.32 (s, 9H); <sup>13</sup>C NMR (151 MHz, CDCl<sub>3</sub>) δ 169.8, 149.7, 142.2, 138.8, 133.2, 131.9, 127.3, 124.7, 122.2, 94.6, 74.6, 60.3, 49.7, 34.6, 31.9, 31.6, 31.5, 16.0; IR (film) 2962, 2867, 1750, 1582, 1554, 1509, 1425, 1364, 1334, 1268, 1194, 1136, 1047, 908, 858, 829, 734 cm<sup>-1</sup>. MS (APCI-) 606.9220 (606.9214 calcd for C<sub>24</sub>H<sub>24</sub>O<sub>2</sub>Br<sub>2</sub>Cl<sub>3</sub>, M - H<sup>+</sup>). The enantiopurity was determined to be 95% ee by chiral HPLC (Chiralpak AD-H, 25 cm x 4.6 mm, 2% IPA/Hexanes, 0.5 mL/min, λ 230 nm, RT= 6.9 and 8.2 min).

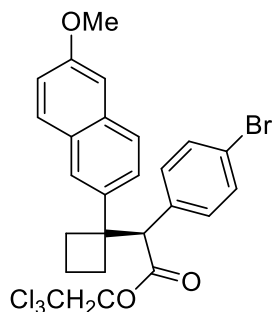

**2,2,2-Trichloroethyl (R)-2-(4-bromophenyl)-2-(1-(6-methoxynaphthalen-2-yl)cyclobutyl)acetate (17).** The general procedure 2 was employed for the C–H functionalization of 2-cyclobutyl-6-methoxynaphthalene (53 mg, 0.25 mmol) by reaction of 2,2,2-trichloroethyl 2-(4-bromophenyl)-2-diazoacetate (186 mg, 0.50 mmol) using  $\text{Rh}_2(\text{R-TCPTAD})_4$  (5.3 mg, 1 mol%) as catalyst. This procedure afforded the title compound (118 mg, 85%) as a colorless solid, mp 44–49 °C:  $[\alpha]_D^{23} -17.1$  (c 1.0,  $\text{CH}_2\text{Cl}_2$ );  $^1\text{H}$  NMR (600 MHz,  $\text{CDCl}_3$ )  $\delta$  7.64 (dd,  $J = 8.7, 2.1$  Hz, 2H), 7.45 (d,  $J = 2.2$  Hz, 1H), 7.39–7.36 (m, 2H), 7.17 (dd,  $J = 8.5, 2.0$  Hz, 1H), 7.13 (dd,  $J = 8.9, 2.5$  Hz, 1H), 7.11–7.07 (m, 3H), 4.66 (d,  $J = 11.9$  Hz, 1H), 4.51 (d,  $J = 12.0$  Hz, 1H), 4.10 (s, 1H), 3.92 (s, 3H), 2.73–2.67 (m, 1H), 2.65–2.58 (m, 1H), 2.58–2.47 (m, 2H), 1.82–1.73 (m, 1H), 1.73–1.66 (m, 1H);  $^{13}\text{C}$  NMR (151 MHz,  $\text{CDCl}_3$ )  $\delta$  170.5, 157.8, 141.1, 134.1, 133.2, 131.8, 131.2, 129.5, 128.5, 126.4, 126.2, 122.0, 119.0, 105.6, 94.7, 74.4, 60.4, 55.5, 49.8, 32.2, 31.3, 16.2, 1 carbon signal is missing due to incidental equivalence; IR (film) 2984, 2948, 1749, 1634, 1605, 1488, 1390, 1372, 1338, 1273, 1217, 1131, 1032, 1011, 925, 852, 908, 813, 761, 723  $\text{cm}^{-1}$ . MS (APCI-) 552.9750 (552.9745 calcd for  $\text{C}_{25}\text{H}_{21}\text{O}_3\text{BrCl}_3$ ,  $\text{M} - \text{H}^+$ ). The enantiopurity was determined to be 98% ee by chiral HPLC analysis (Chiralpak AD-H, 25 cm x 4.6 mm, 1% IPA/Hexanes, 0.5 mL/min,  $\lambda$  230 nm, RT= 18.3 and 20.2 min).

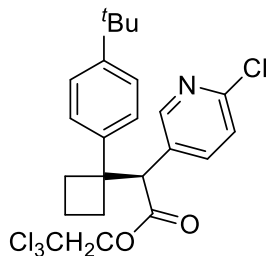

**2,2,2-Trichloroethyl (S)-2-(1-(4-(*tert*-butyl)phenyl)cyclobutyl)-2-(6-chloropyridin-3-yl)acetate (18).** The general procedure 2 was employed for the C–H functionalization of 1-(*tert*-butyl)-4-cyclobutylbenzene (47 mg, 0.25 mmol) by reaction of 2,2,2-trichloroethyl 2-(6-chloropyridin-3-yl)-2-diazoacetate (164 mg, 0.50 mmol) using  $\text{Rh}_2(R\text{-TCPTAD})_4$  (5.3 mg, 1 mol%) as catalyst. This procedure afforded the title compound (76 mg, 62%) as a viscous oil:  $[\alpha]_{\text{D}}^{23} -26.7$  (*c* 1.0,  $\text{CH}_2\text{Cl}_2$ );  $^1\text{H}$  NMR (600 MHz,  $\text{CDCl}_3$ )  $\delta$  8.18 (d,  $J = 2.4$  Hz, 1H), 7.38 (dd,  $J = 8.4, 2.5$  Hz, 1H), 7.30–7.26 (m, 2H), 7.19 (d,  $J = 0.7$  Hz, 1H), 6.97–6.91 (m, 2H), 4.68 (d,  $J = 11.9$  Hz, 1H), 4.58 (d,  $J = 11.9$  Hz, 1H), 4.09 (s, 1H), 2.74–2.67 (m, 1H), 2.54–2.46 (m, 1H), 2.46–2.37 (m, 2H), 1.82–1.74 (m, 2H), 1.30 (s, 9H);  $^{13}\text{C}$  NMR (151 MHz,  $\text{CDCl}_3$ )  $\delta$  169.9, 151.0, 150.8, 149.7, 141.9, 140.3, 129.9, 127.3, 124.9, 123.4, 94.5, 74.7, 57.7, 49.6, 34.6, 32.5, 31.7, 31.5, 16.0; IR (film) 2962, 2868, 1748, 1583, 1562, 1509, 1459, 1395, 1365, 1325, 1141, 1106, 1023, 910, 835, 776, 758, 727  $\text{cm}^{-1}$ . MS (APCI-) 486.0572 (486.0567 calcd for  $\text{C}_{23}\text{H}_{24}\text{O}_2\text{N}_2\text{Cl}_4$ ,  $\text{M} + \text{H}^+$ ). The enantiopurity was determined to be 94% ee by chiral HPLC (Chiralpak ADH, 25 cm x 4.6 mm, 2% IPA/Hexanes, 0.5 mL/min,  $\lambda$  230 nm, RT= 12.3 and 13.8 min).

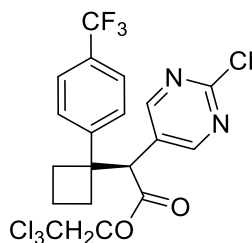

**2,2,2-Trichloroethyl (S)-2-(2-chloropyrimidin-5-yl)-2-(1-(4-(trifluoromethyl)phenyl)-cyclobutyl)acetate (19).** The general procedure 2 was employed for the C–H functionalization of 1-cyclobutyl-4-(trifluoromethyl)benzene (50 mg, 0.25 mmol) by reaction of 2,2,2-trichloroethyl 2-(6-chloropyridin-3-yl)-2-diazoacetate (165 mg, 0.50 mmol) using  $\text{Rh}_2(\text{R-TCPTAD})_4$  (5.3 mg, 1 mol%) as catalyst. This procedure afforded the title compound (45 mg, 36%) as a colorless film:  $[\alpha]_{\text{D}}^{23} -14.5$  ( $c$  1.00,  $\text{CHCl}_3$ );  $^1\text{H}$  NMR (600 MHz,  $\text{CHCl}_3$ -d)  $\delta$  8.30 (s, 2H), 7.59 – 7.49 (m, 2H), 7.10 – 7.03 (m, 2H), 4.72 (d,  $J = 11.9$  Hz, 1H), 4.63 (d,  $J = 11.9$  Hz, 1H), 4.13 (s, 1H), 2.85 – 2.76 (m, 1H), 2.60 – 2.50 (m, 1H), 2.46 – 2.33 (m, 2H), 1.95 – 1.84 (m, integration of 2H could not be determined due to overlap with an  $\text{H}_2\text{O}$  peak);  $^{13}\text{C}$  NMR (151 MHz,  $\text{CDCl}_3$ )  $\delta$  167.62, 160.01, 159.11, 147.12, 128.44 (q,  $J = 33.2$  Hz), 126.85, 124.22 (q,  $J = 4.0$  Hz), 122.82 (q,  $J = 271.9$  Hz), 92.94, 73.90, 54.29, 48.71, 31.26, 14.78.  $^{19}\text{F}$  NMR (282 MHz,  $\text{CDCl}_3$ )  $\delta$  -62.53; IR (film) 2987, 2953, 2851, 1750, 1618, 1577, 1546, 1401, 1327, 1158, 1126, 1071, 1015, 838, 775, 723  $\text{cm}^{-1}$ . MS (ESI-) 498.9777 (486.9767 calcd for  $\text{C}_{19}\text{H}_{14}\text{O}_2\text{N}_2\text{Cl}_4\text{F}_3$ ,  $\text{M} - \text{H}^+$ ). The enantiopurity was determined to be 88% ee by chiral HPLC (Chiralpak IHU 1.6  $\mu\text{m}$ , 100 mm x 3 mm, 5.0% IPA/Hexanes, 0.5 mL/min,  $\lambda$  230 nm, RT= 2.91 and 3.66 min).

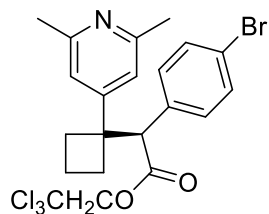

**2,2,2-trichloroethyl** **(*R*)-2-(4-bromophenyl)-2-(1-(2,6-dimethylpyridin-4-yl)cyclobutyl)acetate (20)**. The general procedure 2 was employed for the C-H functionalization of 4-cyclobutyl-2,6-dimethylpyridine (40.3 mg, 0.25 mmol) by reaction of 2-(4-bromophenyl)-2-diazoacetate (186 mg, 0.50 mmol) using  $\text{Rh}_2(\text{R-TCPTAD})_4$  (5.3 mg, 1 mol%) as catalyst. This procedure afforded the title compound (41 mg, 32%) as a colorless oil:  $[\alpha]_D^{23} + 4.4$  (c 1.00,  $\text{CHCl}_3$ );  $^1\text{H}$  NMR (600 MHz,  $\text{CHCl}_3$ -d)  $\delta$  7.42 – 7.36 (m, 2H), 7.10 – 7.04 (m, 2H), 6.63 (s, 2H), 4.67 (d,  $J = 12.0$  Hz, 1H), 4.49 (d,  $J = 11.9$  Hz, 1H), 3.94 (s, 1H), 2.60 – 2.46 (m, 2H), 2.43 (s, 6H), 2.41 – 2.28 (m, 2H), 1.73 – 1.55 (m, 2H).  $^{13}\text{C}$  NMR (151 MHz,  $\text{CDCl}_3$ )  $\delta$  169.89, 157.18, 155.75, 133.43, 131.46, 131.20, 122.19, 119.19, 94.42, 74.30, 59.40, 48.99, 31.61, 30.62, 24.51, 16.01. IR (neat) 2949, 2925, 2854, 1749, 1603, 1561, 1489, 1438, 1408, 1372, 1133, 1075, 1011, 826, 761, 719  $\text{cm}^{-1}$ . MS (APCI+) 503.9888 (503.9894 calcd for  $\text{C}_{21}\text{H}_{22}\text{O}_2\text{N}^{79}\text{Br}^{35}\text{Cl}_3$ ,  $\text{M} + \text{H}^+$ ) The enantiopurity was determined to be 99% ee by chiral HPLC (Chiralpak AD-H, 25 cm x 4.6 mm, 2.0% IPA/Hexanes, 1.0 mL/min,  $\lambda$  230 nm, RT= 8.9 and 10.0 min)

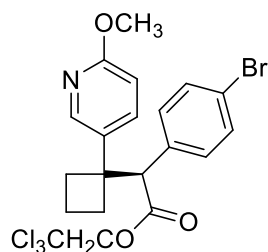

**2,2,2-trichloroethyl (R)-2-(4-bromophenyl)-2-(1-(6-methoxypyridin-3-yl)cyclobutyl)acetate (21).** The general procedure 2 was employed for the C-H functionalization of 5-cyclobutyl-2-methoxypyridine (40.8 mg, 0.25 mmol) by reaction of 2-(4-bromophenyl)-2-diazoacetate (186 mg, 0.50 mmol) using  $\text{Rh}_2(\text{R-TCPTAD})_4$  (5.3 mg, 1 mol%) as catalyst. This procedure afforded the title compound (59 mg, 46%) as a colorless oil:  $[\alpha]^{23}_{\text{D}} - 28.1$  (c 1.00,  $\text{CHCl}_3$ );  $^1\text{H}$  NMR (500 MHz,  $\text{CHCl}_3$ -d)  $\delta$  7.82 (d, J = 2.6 Hz, 1H), 7.43 – 7.36 (m, 2H), 7.28 – 7.21 (m, 1H), 7.05 – 6.98 (m, 2H), 6.63 (d, J = 8.6 Hz, 1H), 4.75 (d, J = 12.0 Hz, 1H), 4.56 (d, J = 12.0 Hz, 1H), 4.04 (s, 1H), 3.91 (s, 3H), 2.62 (qd, J = 8.2, 4.3 Hz, 1H), 2.54 – 2.37 (m, 2H), 2.33 (tdd, J = 10.7, 7.8, 2.2 Hz, 1H), 1.79 (p, J = 7.7 Hz, 2H).  $^{13}\text{C}$  NMR (126 MHz,  $\text{CDCl}_3$ )  $\delta$  170.07, 162.61, 146.27, 138.36, 133.49, 133.23, 131.50, 131.19, 122.09, 109.52, 94.52, 74.19, 59.93, 53.39, 47.41, 32.12, 31.68, 16.20. IR (neat) 2980, 2946, 1748, 1604, 1489, 1374, 1286, 1131, 1023, 1011, 908, 827, 721  $\text{cm}^{-1}$ . MS (APCI+) XX (XX calcd for  $\text{C}_{21}\text{H}_{22}\text{O}_2\text{N}^{79}\text{Br}^{35}\text{Cl}_3$ , M +  $\text{H}^+$ ) The enantiopurity was determined to be 99% ee by chiral HPLC (Chiralpak AD-H, 25 cm x 4.6 mm, 0.5% IPA/Hexanes, 1.0 mL/min,  $\lambda$  230 nm, RT= 17.4 and 26.2 min)

## Compound Characterization for C3 Functionalization of Substituted Cyclobutanes

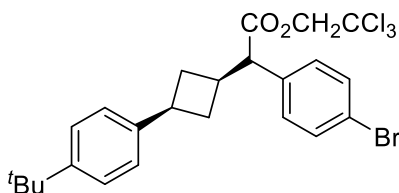

**2,2,2-Trichloroethyl** **(S)-2-(4-bromophenyl)-2-((1S,3R)-3-(4-methoxyphenyl)cyclobutyl)acetate (9).** The general procedure 2 was employed for the C–H functionalization of 1-(*tert*-butyl)-4-cyclobutylbenzene (50 mg, 0.25 mmol) by reaction of 2,2,2-trichloroethyl 2-(4-bromophenyl)-2-diazoacetate (186 mg, 0.50 mmol) using  $\text{Rh}_2(\text{S-2-Cl-5-BrTPCP})_4$  (4.8 mg, 1 mol%) as catalyst. This procedure afforded the title compound (94 mg, 71%) as a colorless oil. The ratio of *cis:trans* cyclobutane diastereomers was >95:5 by  $^1\text{H}$ NMR (By relative integration of the doublets at 3.61 and 3.89 ppm, respectively.) The ratio of C3:C1 functionalization products was > 95:5 by  $^1\text{H}$ NMR [ $\alpha$ ] $^{20}_{\text{D}}$  +71.3 (*c* 1.00,  $\text{CHCl}_3$ );  $^1\text{H}$  NMR (400 MHz,  $\text{CDCl}_3$ )  $\delta$  7.49–7.43 (m, 2H), 7.35–7.29 (m, 2H), 7.24–7.20 (m, 2H), 7.12–7.07 (m, 2H), 4.75 (d,  $J$  = 12.0 Hz, 1H), 4.67 (d,  $J$  = 12.0 Hz, 1H), 3.61 (d,  $J$  = 10.8 Hz, 1H), 3.43–3.28 (m, 1H), 3.08–2.87 (m, 1H), 2.75–2.58 (m, 1H), 2.34–2.21 (m, 1H), 2.00 (q,  $J$  = 10.3 Hz, 1H), 1.74 (q,  $J$  = 10.3 Hz, 1H), 1.30 (s, 9H);  $^{13}\text{C}$  NMR (100 MHz,  $\text{CDCl}_3$ )  $\delta$  171.0, 148.9, 142.0, 135.4, 131.8, 129.9, 125.9, 125.2, 121.6, 94.8, 74.1, 57.7, 35.24, 34.38, 34.17, 34.12, 31.38; IR (film) 3052, 3024, 2961, 2903, 2864, 1749, 1488, 1364, 1132, 1072, 1010, 909, 827, 759, 716, 568  $\text{cm}^{-1}$ . MS (APCI+) 530.0175 (530.0176 calcd for  $\text{C}_{24}\text{H}_{26}\text{O}_2\text{BrCl}_3$ ,  $M^+$ ). The enantiopurity was determined to be 92% ee by chiral HPLC (Registech (*R,R*)-Whelk, 25 cm x 4.6 mm, 0.5% IPA/Hexanes, 1.0 mL/min,  $\lambda$  230 nm, RT= 9.4 and 11.6 min).

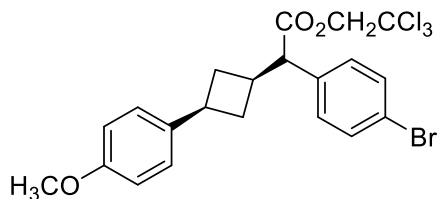

**2,2,2-Trichloroethyl** **(S)-2-(4-bromophenyl)-2-((1S,3R)-3-(4-methoxyphenyl)cyclobutyl)acetate (22)**. The general procedure 2 was employed for the C–H functionalization of 1-cyclobutyl-4-methoxybenzene (41 mg, 0.25 mmol) by reaction of 2-(4-bromophenyl)-2-diazoacetate (186 mg, 0.50 mmol) using  $\text{Rh}_2(\text{S-2-Cl-5-BrTPCP})_4$  (4.8 mg, 1 mol%) as catalyst. This procedure afforded the title compound (79 mg, 62%) as a colorless oil. The ratio of *cis:trans* cyclobutane diastereomers was >95:5 by  $^1\text{H}$ NMR (By relative integration of the doublets at 3.61 and 3.89 ppm, respectively.) The ratio of C3:C1 functionalization products was 76:24 by  $^1\text{H}$ NMR.  $[\alpha]^{23}_{\text{D}} +63.1$  (c 1.00,  $\text{CHCl}_3$ );  $^1\text{H}$  NMR (600 MHz,  $\text{CDCl}_3$ )  $\delta$  7.48–7.44 (m, 2H), 7.25–7.21 (m, 2H), 7.08 (d,  $J$  = 8.4 Hz, 2H), 6.86–6.82 (m, 2H), 4.77 (d,  $J$  = 12.0 Hz, 1H), 4.68 (d,  $J$  = 12.0 Hz, 1H), 3.79 (s, 3H), 3.62 (d,  $J$  = 10.7 Hz, 1H), 3.34 (ddd,  $J$  = 18.0, 9.9, 8.2 Hz, 1H), 3.01–2.90 (m, 1H), 2.67 (ddt,  $J$  = 10.3, 7.3, 3.8 Hz, 1H), 2.27 (ddt,  $J$  = 12.6, 7.6, 3.8 Hz, 1H), 1.95 (q,  $J$  = 10.2 Hz, 1H), 1.69 (q,  $J$  = 10.3 Hz, 1H);  $^{13}\text{C}$  NMR (151 MHz,  $\text{CDCl}_3$ )  $\delta$  171.1, 158.0, 137.3, 135.5, 131.9, 130.1, 127.4, 121.8, 113.9, 94.9, 74.2, 57.8, 55.5, 35.6, 35.2, 34.6, 34.2; IR (neat) 2959, 2932, 1748, 1610, 1513, 1488, 1297, 1246, 1177, 1136, 1073, 1036, 1011, 829, 800, 760, 720  $\text{cm}^{-1}$ . MS (APCI-) 502.9594 (502.9589 calcd for  $\text{C}_{21}\text{H}_{19}\text{O}_3\text{BrCl}_3$ ,  $\text{M} - \text{H}^+$ ). The enantiopurity was determined to be 92% ee by chiral HPLC (Chiralpak IH-U, 10 cm x 3.0 mm, 1.6  $\mu\text{m}$  particle size, 5% IPA/Hexanes, 0.35 mL/min,  $\lambda$  230 nm, RT= 3.2 and 3.6 min).

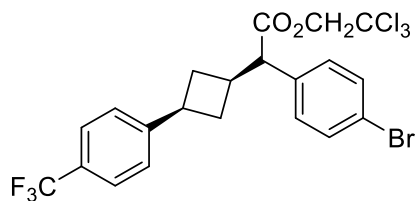

**2,2,2-Trichloroethyl** **(S)-2-(4-bromophenyl)-2-((1S,3R)-3-(4-(trifluoromethyl)phenyl)cyclobutyl)acetate (23)**. The general procedure 2 was employed for the C–H functionalization of 1-cyclobutyl-4-(trifluoromethyl)benzene (50 mg, 0.25 mmol) by reaction of 2,2,2-trichloroethyl 2-(4-bromophenyl)-2-diazoacetate (186 mg, 0.50 mmol) using  $\text{Rh}_2(\text{S-2-Cl-5-BrTPCP})_4$  (4.8 mg, 1 mol%) as catalyst. This procedure afforded the title compound (118 mg, 87%) as a colorless solid. The ratio of *cis:trans* cyclobutane diastereomers was >95:5 by  $^1\text{H}$ NMR (By relative integration of the doublets at 3.61 and 3.89 ppm, respectively.) The ratio of C3:C1 functionalization products was >95:5 by  $^1\text{H}$ NMR. mp 83.0–83.5 °C:  $[\alpha]^{20}_{\text{D}} +71.1$  (c 1.00,  $\text{CHCl}_3$ );  $^1\text{H}$  NMR (600 MHz,  $\text{CDCl}_3$ )  $\delta$  7.53 (d,  $J = 8.1$  Hz, 2H), 7.49–7.44 (m, 2H), 7.27–7.19 (m, 4H), 4.76 (d,  $J = 12.0$ , 0.8 Hz, 1H), 4.68 (d,  $J = 12.0$ , 0.8 Hz, 1H), 3.61 (d,  $J = 10.8$  Hz, 1H), 3.48–3.39 (m, 1H), 3.07–2.95 (m, 1H), 2.78–2.67 (m, 1H), 2.32 (dtd,  $J = 11.1$ , 7.7, 4.8 Hz, 1H), 2.00 (q,  $J = 10.2$  Hz, 1H), 1.73 (q,  $J = 10.4$  Hz, 1H).  $^{13}\text{C}$  NMR (126 MHz,  $\text{CDCl}_3$ )  $\delta$  170.9, 149.1, 135.2, 132.0, 130.1, 128.4 (q,  $J = 32.4$  Hz), 126.7, 125.4 (q,  $J = 3.8$  Hz), 124.4 (q,  $J = 272$  Hz), 121.9, 94.9, 74.2, 57.6, 35.5, 35.1, 34.2, 34.0;  $^{19}\text{F}$  NMR (471 MHz,  $\text{CDCl}_3$ )  $\delta$  -62.30; IR (film) 3046, 2970, 2939, 2861, 1749, 1618, 1488, 1323, 1162, 1120, 1066, 1012, 834, 758, 718  $\text{cm}^{-1}$ . MS (APCI+) 541.9424 (541.9424 calcd for  $\text{C}_{21}\text{H}_{17}\text{O}_2\text{BrCl}_3$ ,  $\text{M}^+$ ). The enantiopurity was determined to be 90% ee by chiral HPLC (Chiralpak OD-H, 25 cm x 4.6 mm, 0.5% IPA/Hexanes, 1.0 mL/min,  $\lambda$  230 nm, RT= 9.96 and 12.96 min).

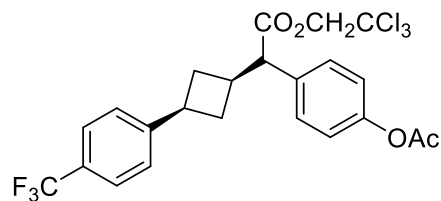

**2,2,2-Trichloroethyl (R)-2-(4-acetoxycyclobutyl)-2-((1S,3S)-3-(4-(trifluoromethyl)phenyl)cyclobutyl)acetate (24).** The general procedure 2 was employed for the C–H functionalization of 1-cyclobutyl-4-(trifluoromethyl)benzene (50 mg, 0.25 mmol) by reaction of 2,2,2-trichloroethyl 2-(4-acetoxycyclobutyl)-2-diazoacetate (176 mg, 0.50 mmol) using  $\text{Rh}_2(\text{S-2-Cl-5-BrTPCP})_4$  (4.8 mg, 1 mol%) as catalyst. This procedure afforded the title compound (121 mg, 92%) as a colorless oil. The ratio of *cis:trans* cyclobutane diastereomers was >95:5 by  $^1\text{H}$ NMR (By relative integration of the doublets at 3.61 and 3.89 ppm, respectively.) The ratio of C3:C1 functionalization products was >95:5 by  $^1\text{H}$ NMR.  $[\alpha]_{\text{D}}^{23} +41.8$  (c 1.00,  $\text{CHCl}_3$ );  $^1\text{H}$  NMR (600 MHz,  $\text{CDCl}_3$ )  $\delta$  7.52 (d,  $J = 8.1$  Hz, 2H), 7.36–7.32 (m, 2H), 7.24–7.21 (m, 2H), 7.08–7.03 (m, 2H), 4.78 (d,  $J = 12.0$  Hz, 1H), 4.65 (d,  $J = 12.0$  Hz, 1H), 3.64 (d,  $J = 10.7$  Hz, 1H), 3.50–3.39 (m, 1H), 3.10–2.98 (m, 1H), 2.75–2.67 (m, 1H), 2.42–2.31 (m, 1H), 2.28 (s, 3H), 1.98 (q,  $J = 10.2$  Hz, 1H), 1.75 (q,  $J = 10.3$  Hz, 1H);  $^{13}\text{C}$  NMR (151 MHz,  $\text{CDCl}_3$ )  $\delta$  171.03, 169.33, 150.23, 149.11, 133.60, 129.26, 128.28 (q,  $J = 32.3$  Hz), 126.59, 125.24 (q,  $J = 3.3$  Hz), 124.31 (q,  $J = 272.1$  Hz), 121.83, 94.82, 74.05, 57.48, 35.44, 34.89, 34.20, 34.00, 21.13.  $^{19}\text{F}$  NMR (282 MHz,  $\text{CDCl}_3$ )  $\delta$  -62.27; IR (neat) 3042, 2968, 2934, 2860, 1749, 1618, 1507, 1421, 1370, 1323, 1196, 1163, 1120, 1066, 1017, 909, 837, 754, 719  $\text{cm}^{-1}$ . MS (ESI-) 557.0082 (557.0087 calcd for  $\text{C}_{24}\text{H}_{16}\text{N}_4\text{Cl}_4\text{F}_3$ ,  $\text{M} + \text{Cl}^-$ ). The enantiopurity was determined to be 66% ee by chiral HPLC (Chiralpak IHU 1.6  $\mu\text{m}$ , 100 mm x 3 mm, 5.0% IPA/Hexanes, 0.500 mL/min,  $\lambda$  230 nm, RT= 3.25 and 3.87 min).

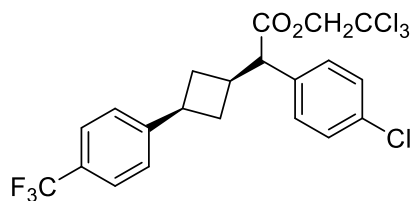

## 2,2,2-Trichloroethyl

## (S)-2-(4-chlorophenyl)-2-((1S,3R)-3-(4-

**(trifluoromethyl)phenyl)cyclobutyl)acetate (25).** The general procedure 2 was employed for the C–H functionalization of 1-cyclobutyl-4-(trifluoromethyl)benzene (50 mg, 0.25 mmol) by reaction of 2,2,2-trichloroethyl 2-(4-chlorophenyl)-2-diazoacetate (164 mg, 0.50 mmol) using  $\text{Rh}_2(\text{S-2-Cl-5-BrTPCP})_4$  (4.8 mg, 1 mol%) as catalyst. This procedure afforded the title compound (88 mg, 70%) as a colorless oil. The ratio of *cis:trans* cyclobutane diastereomers was equal to 95:5 by  $^1\text{H}$ NMR (By relative integration of the doublets at 3.61 and 3.89 ppm, respectively.) The ratio of C3:C1 functionalization products was >95:5 by  $^1\text{H}$ NMR.  $[\alpha]^{23}_{\text{D}} +62.4$  (c 1.00,  $\text{CHCl}_3$ );  $^1\text{H}$  NMR (600 MHz,  $\text{CDCl}_3$ )  $\delta$  7.53 (d,  $J$  = 8.0 Hz, 2H), 7.33–7.29 (m, 2H), 7.29–7.26 (m, 2H), 7.25–7.21 (m, 2H), 4.76 (d,  $J$  = 12.0, 1.0 Hz, 1H), 4.68 (d,  $J$  = 12.0, 1.0 Hz, 1H), 3.62 (d,  $J$  = 10.6 Hz, 1H), 3.44 (p,  $J$  = 9.1 Hz, 1H), 3.08–2.97 (m, 1H), 2.78–2.68 (m, 1H), 2.35–2.29 (m, 1H), 2.00 (q,  $J$  = 10.2 Hz, 1H), 1.73 (q,  $J$  = 10.3 Hz, 1H);  $^{13}\text{C}$  NMR (75 MHz,  $\text{CDCl}_3$ )  $\delta$  171.0, 149.1, 134.7, 133.8, 129.7, 129.1, 128.4 (q,  $J$  = 32.3 Hz), 126.7, 125.4 (q,  $J$  = 3.7 Hz), 122.60 (q,  $J$  = 272 Hz), 94.9, 74.2, 57.6, 35.5, 35.1, 34.3, 34.0;  $^{19}\text{F}$  NMR (282 MHz,  $\text{CDCl}_3$ )  $\delta$  -62.30; IR (neat) 3047, 2970, 2939, 2862, 1749, 1618, 1491, 1323, 1162, 1120, 1066, 1015, 834, 765, 715  $\text{cm}^{-1}$ . MS (APCI+) 497.9927 (497.9929 calcd for  $\text{C}_{21}\text{H}_{17}\text{O}_2\text{Cl}_4\text{F}_3$ , M +). The enantiomeric excess was determined to be 87% by chiral HPLC (Chiralpak AD-H, 25 cm x 4.6 mm, 1% IPA/Hexanes, 1.0 mL/min,  $\lambda$  230 nm, RT= 8.96 and 11.74 min).

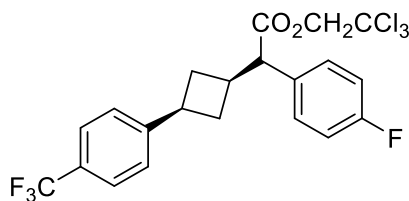

**2,2,2-Trichloroethyl** **(S)-2-(4-fluorophenyl)-2-((1S,3R)-3-(4-(trifluoromethyl)phenyl)cyclobutyl)acetate (26).** The general procedure 2 was employed for the C–H functionalization of 1-cyclobutyl-4-(trifluoromethyl)benzene (50 mg, 0.25 mmol) by reaction of 2,2,2-trichloroethyl 2-diazo-2-(4-fluorophenyl)acetate (156 mg, 0.50 mmol) using  $\text{Rh}_2(\text{S-2-Cl-5-BrTPCP})_4$  (4.8 mg, 1 mol%) as catalyst. Obtained 99 mg of compound **24** as a colorless oil (82% yield.) The ratio of *cis:trans* cyclobutane diastereomers was equal to 94:6 by  $^1\text{H}$ NMR (By relative integration of the doublets at 3.61 and 3.89 ppm, respectively.) The ratio of C3:C1 functionalization products was equal to 93:7 by  $^1\text{H}$ NMR.  $[\alpha]^{23}_{\text{D}} +24.9$  (c 1.00,  $\text{CHCl}_3$ );  $^1\text{H}$  NMR (600 MHz, Chloroform- $d$ )  $\delta$  7.53 (d,  $J$  = 8.1 Hz, 2H), 7.36 – 7.29 (m, 2H), 7.24 (s, 2H), 7.03 (t,  $J$  = 8.6 Hz, 2H), 4.76 (d,  $J$  = 12.0 Hz, 1H), 4.69 (d,  $J$  = 12.0 Hz, 1H), 3.63 (d,  $J$  = 10.7 Hz, 1H), 3.45 (p,  $J$  = 9.1 Hz, 1H), 3.03 (qt,  $J$  = 10.1, 7.5 Hz, 1H), 2.78 – 2.68 (m, 1H), 2.37 – 2.28 (m, 1H), 2.00 (q,  $J$  = 10.2 Hz, 1H), 1.74 (q,  $J$  = 10.3 Hz, 1H).  $^{13}\text{C}$  NMR (151 MHz,  $\text{CDCl}_3$ )  $\delta$  171.11, 162.33 (d,  $J$  = 246.1 Hz), 149.05, 131.89 (d,  $J$  = 3.3 Hz), 129.82 (d,  $J$  = 7.8 Hz), 128.32 (q,  $J$  = 32.2 Hz), 126.57, 125.25 (q,  $J$  = 3.3 Hz), 124.38 (q,  $J$  = 271.8 Hz), 115.65 (d,  $J$  = 21.7 Hz), 94.79, 74.05, 57.30, 35.42, 34.93, 34.22, 33.93.  $^{19}\text{F}$  NMR (282 MHz,  $\text{CDCl}_3$ )  $\delta$  -62.30, -114.59; IR (neat) 3046, 2969, 2940, 2863, 1749, 1618, 1509, 1323, 1225, 1161, 1120, 1066, 1016, 837, 802, 754, 717  $\text{cm}^{-1}$ . MS (APCI-) 481.0159 (481.0158 calcd for  $\text{C}_{21}\text{H}_{16}\text{O}_2\text{Cl}_3\text{F}_4$ ,  $\text{M} - \text{H}^+$ ). The enantiopurity was determined to be 74% ee by chiral HPLC (Chiralpak AD-H, 25 cm x 4.6 mm, 1.0% IPA/Hexanes, 1.0 mL/min,  $\lambda$  210 nm,  $\text{RT}$  = 8.43

and 10.45 min).

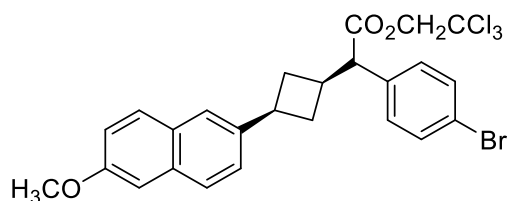

**2,2,2-Trichloroethyl (S)-2-(4-bromophenyl)-2-((1S,3R)-3-(6-methoxynaphthalen-2-yl)cyclobutyl)acetate (27).** The general procedure 2 was employed for the C–H functionalization of 2-cyclobutyl-6-methoxynaphthalene (53 mg, 0.25 mmol) by reaction of 2,2,2-trichloroethyl 2-(4-bromophenyl)-2-diazoacetate (186 mg, 0.50 mmol) using  $\text{Rh}_2(\text{S-2-Cl-5-BrTPCP})_4$  (4.8 mg, 1 mol%) as catalyst. This procedure afforded the title compound (87 mg, 67%) as a colorless solid. Neither the ratio of *cis:trans* cyclobutane diastereomers nor the ratio of C3:C1 functionalization products could be accurately determined by  $^1\text{H}$ NMR due to overlaps. For this experiment, the reported values were determined by isolation. mp 84–89 °C:  $[\alpha]^{23}_{\text{D}} +80.6$  (*c* 1.00,  $\text{CH}_2\text{Cl}_2$ );  $^1\text{H}$  NMR (600 MHz,  $\text{CDCl}_3$ )  $\delta$  7.67 (d, *J* = 8.6 Hz, 2H), 7.48 (d, *J* = 8.3 Hz, 3H), 7.29–7.22 (m, 3H), 7.16–7.09 (m, 2H), 4.78 (d, *J* = 11.9 Hz, 1H), 4.70 (d, *J* = 12.0 Hz, 1H), 3.91 (s, 3H), 3.66 (d, *J* = 10.7 Hz, 1H), 3.53 (p, *J* = 9.1 Hz, 1H), 3.04 (dp, *J* = 17.4, 9.7, 8.6 Hz, 1H), 2.76 (dq, *J* = 15.4, 7.6 Hz, 1H), 2.35 (dq, *J* = 12.4, 7.7, 6.2 Hz, 1H), 2.08 (q, *J* = 10.2 Hz, 1H), 1.82 (q, *J* = 10.3 Hz, 1H);  $^{13}\text{C}$  NMR (151 MHz,  $\text{CDCl}_3$ )  $\delta$  171.1, 157.4, 140.3, 135.5, 133.2, 132.0, 130.1, 129.1, 129.0, 127.0, 125.7, 124.2, 121.8, 119.0, 105.8, 94.9, 74.2, 57.8, 55.4, 35.8, 35.3, 34.3, 34.3; IR (film) 3055, 2961, 2934, 2856, 1750, 1634, 1606, 1487, 1266, 1216, 1135, 1073, 1032, 1011, 852, 830, 810, 761, 718  $\text{cm}^{-1}$ . MS (NSI+) 554.9899 (554.9891

calcd for  $C_{25}H_{23}O_3BrCl_3$ ,  $M + H^+$ ). The enantiopurity was determined to be 94% ee by chiral HPLC (Chiralpak IH-U, 10 cm x 3.0 mm, 1.6  $\mu$ m particle size, 5% IPA/Hexanes, 0.35 mL/min,  $\lambda$  230 nm, RT= 4.4 and 5.7 min).

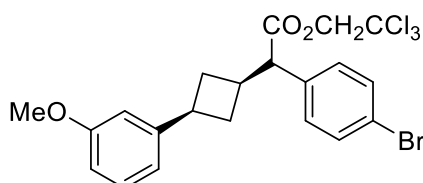

**2,2,2-Trichloroethyl** **(S)-2-(4-bromophenyl)-2-((1S,3R)-3-(3-methoxyphenyl)cyclobutyl)acetate (28)**. The general procedure 2 was employed for the C–H functionalization of 1-cyclobutyl-3-methoxybenzene (41 mg, 0.25 mmol) by reaction of 2-(4-bromophenyl)-2-diazoacetate (186 mg, 0.50 mmol) using  $Rh_2(S-2-Cl-5-BrTPCP)_4$  (4.8 mg, 1 mol%) as catalyst. This procedure afforded the title compound (45 mg, 35%) as a colorless oil. The ratio of *cis:trans* cyclobutane diastereomers was equal to 95:5 by  $^1H$ NMR (By relative integration of the doublets at 3.61 and 3.89 ppm, respectively.) The ratio of C3:C1 functionalization products was >95:5 by  $^1H$ NMR.  $[\alpha]^{23}_D +63.7$  (c 1.00,  $CHCl_3$ );  $^1H$  NMR (600 MHz,  $CDCl_3$ )  $\delta$  7.52–7.43 (m, 2H), 7.24–7.19 (m, 3H), 6.76–6.71 (m, 2H), 6.69 (s, 1H), 4.77 (d,  $J = 12.0$  Hz, 1H), 4.68 (d,  $J = 11.9$  Hz, 1H), 3.79 (s, 3H), 3.61 (d,  $J = 10.8$  Hz, 1H), 3.38 (ddd,  $J = 18.1, 10.0, 7.9$  Hz, 1H), 2.98 (qt,  $J = 9.9, 7.4$  Hz, 1H), 2.69 (dtd,  $J = 10.9, 7.8, 5.0$  Hz, 1H), 2.28 (dtd,  $J = 11.1, 7.6, 4.9$  Hz, 1H), 1.99 (q,  $J = 10.2$  Hz, 1H), 1.73 (q,  $J = 10.3$  Hz, 1H);  $^{13}C$  NMR (151 MHz,  $CDCl_3$ )  $\delta$  171.1, 159.8, 146.9, 135.5, 131.9, 130.1, 129.5, 121.8, 118.8, 112.4, 111.2, 94.9, 74.2, 57.8, 55.3, 35.8, 35.2, 34.2, 34.2; IR (neat) 2962, 2934, 2856, 2834, 1748, 1600, 1582, 1488, 1464, 1453, 1433, 1407, 1371, 1332, 1288, 1259, 1194, 1158, 1134, 1073, 1046,

1011, 910, 865, 824, 803, 763, 754, 719, 696  $\text{cm}^{-1}$ . MS (APCI-) 502.9595 (502.9589 calcd for  $\text{C}_{21}\text{H}_{19}\text{O}_3\text{BrCl}_3$ ,  $\text{M} - \text{H}^+$ ). The enantiopurity was determined to be 88% ee by chiral HPLC (Regis Technologies, Inc. (S,S)-Whelk-01, 25 cm x 4.6 mm, 0.5% IPA/Hexanes, 1.0 mL/min,  $\lambda$  230 nm, RT= 30.5 and 39.5 min).

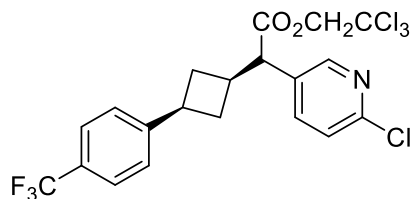

**2,2,2-Trichloroethyl (S)-2-(6-chloropyridin-3-yl)-2-((1S,3R)-3-(4-(trifluoromethyl)phenyl)cyclobutyl)acetate (29).** The general procedure 2 was employed for the C–H functionalization of 1-cyclobutyl-4-(trifluoromethyl)benzene (50 mg, 0.25 mmol) by reaction of 2,2,2-trichloroethyl 2-(6-chloropyridin-3-yl)-2-diazoacetate (164 mg, 0.50 mmol) using  $\text{Rh}_2(\text{S-2-Cl-5-BrTPCP})_4$  (4.8 mg, 1 mol%) as catalyst. This procedure afforded the title compound (45 mg, 36%) as a colorless oil. The ratio of *cis:trans* cyclobutane diastereomers was equal to 93:7 by  $^1\text{H}$ NMR (By relative integration of the doublets at 3.61 and 3.89 ppm, respectively.) The ratio of C3:C1 functionalization products was 87:13 by  $^1\text{H}$ NMR.  $[\alpha]^{23}_{\text{D}} +63.1$  ( $c$  1.00,  $\text{CHCl}_3$ );  $^1\text{H}$  NMR (300 MHz,  $\text{CDCl}_3$ )  $\delta$  8.35 (d,  $J$  = 2.6 Hz, 1H), 7.70 (dd,  $J$  = 8.3, 2.6 Hz, 1H), 7.54 (d,  $J$  = 8.0 Hz, 2H), 7.34 (d,  $J$  = 8.3 Hz, 1H), 7.25 (d,  $J$  = 8.2 Hz, 2H), 4.79 (d,  $J$  = 12.0 Hz, 1H), 4.71 (d,  $J$  = 12.0 Hz, 1H), 3.68 (d,  $J$  = 10.7 Hz, 1H), 3.47 (p,  $J$  = 9.2 Hz, 1H), 3.01 (qt,  $J$  = 9.9, 7.3 Hz, 1H), 2.76 (dtd,  $J$  = 15.5, 7.6, 4.9 Hz, 1H), 2.35 (dtd,  $J$  = 15.6, 7.6, 4.9 Hz, 1H), 2.06 (q,  $J$  = 10.2 Hz, 1H), 1.74 (q,  $J$  = 10.3 Hz, 1H);  $^{13}\text{C}$  NMR (75 MHz,  $\text{CDCl}_3$ )  $\delta$  170.3, 151.2, 149.6, 148.7, 138.5, 131.0, 128.6 (q,  $J$  = 32.3 Hz), 126.7, 125.4 (q,  $J$  = 3.8 Hz), 124.6, 124.4 (q,  $J$  = 272

Hz), 94.6, 74.3, 54.8, 35.4, 35.1, 34.3, 34.0;  $^{19}\text{F}$  NMR (282 MHz,  $\text{CDCl}_3$ )  $\delta$  -62.34; IR (neat) 3048, 2970, 2936, 2862, 1750, 1618, 1585, 1565, 1461, 1323, 1161, 1104, 1065, 1017, 835, 774, 758, 718  $\text{cm}^{-1}$ . MS (APCI+) 499.9969 (499.9960 calcd for  $\text{C}_{20}\text{H}_{17}\text{O}_2\text{NCl}_4\text{F}_3$ ,  $\text{M} + \text{H}^+$ ). The enantiopurity was determined to be 80% ee by chiral HPLC (Chiralpak OD-H, 25 cm x 4.6 mm, 5% IPA/Hexanes, 1.0 mL/min,  $\lambda$  230 nm, RT= 11.2 and 19.2 min).

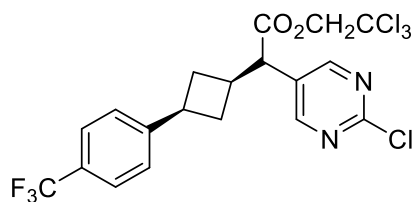

**2,2,2-Trichloroethyl (S)-2-(2-chloropyrimidin-5-yl)-2-((1S,3R)-3-(4-(trifluoromethyl)phenyl)cyclobutyl)acetate (30).** The general procedure 2 was employed for the C–H functionalization of 1-cyclobutyl-4-(trifluoromethyl)benzene (50 mg, 0.25 mmol) by reaction of 2,2,2-trichloroethyl 2-(2-chloropyrimidin-5-yl)-2-diazoacetate (165 mg, 0.50 mmol) using  $\text{Rh}_2(\text{S-2-Cl-5-BrTPCP})_4$  (4.8 mg, 1 mol%) as catalyst. This procedure afforded the title compound (29 mg, 29%) as a colorless oil. The ratio of *cis:trans* cyclobutane diastereomers was equal to 94:6 by  $^1\text{H}$ NMR (By relative integration of the doublets at 3.61 and 3.92 ppm, respectively.) The ratio of C3:C1 functionalization products was 89:11 by  $^1\text{H}$ NMR.  $[\alpha]^{23}_{\text{D}} +26.0$  ( $c$  1.00,  $\text{CHCl}_3$ );  $^1\text{H}$  NMR (500 MHz, Chloroform- $d$ )  $\delta$  8.65 (s, 2H), 7.67 – 7.49 (m, 2H), 7.28 – 7.22 (m, 2H), 4.81 (d,  $J$  = 11.9 Hz, 1H), 4.75 (d,  $J$  = 11.9 Hz, 1H), 3.69 (d,  $J$  = 10.6 Hz, 1H), 3.51 (p,  $J$  = 9.2 Hz, 1H), 3.02 (dtd,  $J$  = 17.4, 9.9, 7.4 Hz, 1H), 2.80 (dtd,  $J$  = 12.3, 7.6, 4.8 Hz, 1H), 2.41 (ddd,  $J$  = 11.5, 7.9, 4.9 Hz, 1H), 2.12 (q,  $J$  = 10.3 Hz, 1H), 1.76 (q,  $J$  = 10.3 Hz, 1H). ;  $^{13}\text{C}$  NMR

(151 MHz, CDCl<sub>3</sub>)  $\delta$  169.30, 161.02, 159.20, 148.18, 128.62, 128.61 (q,  $J$  = 32.3 Hz), 126.49, 125.38 (q,  $J$  = 4.4 Hz), 124.21 (q,  $J$  = 271.8 Hz), 94.33, 74.41, 52.62, 35.26, 35.00, 34.16, 34.00. <sup>19</sup>F NMR (282 MHz, CDCl<sub>3</sub>)  $\delta$  -62.37; IR (film) 3045, 2974, 2941, 2864, 1750, 1618, 1578, 1547, 1399, 1323, 1155, 1112, 1065, 1016, 908, 837, 774, 729, 714 cm<sup>-1</sup>. MS (APCI+) 500.9912 (500.9913 calcd for C<sub>19</sub>H<sub>16</sub>O<sub>2</sub>N<sub>2</sub>Br<sub>2</sub>Cl<sub>4</sub>F<sub>3</sub>, M + H<sup>+</sup>). The enantiopurity was determined to be 79% ee by chiral HPLC (Chiralpak OD-H, 25 cm x 4.6 mm, 5% IPA/Hexanes, 1.0 mL/min,  $\lambda$  210 nm, RT = 19.8 and 23.1 min).

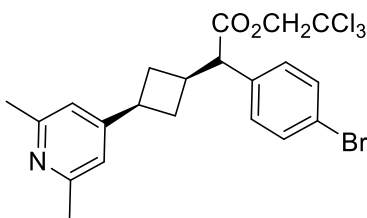

**2,2,2-trichloroethyl (S)-2-(4-bromophenyl)-2-((1S,3R)-3-(2,6-dimethylpyridin-4-yl)cyclobutyl)acetate (31).** The general procedure 2 was employed for the C-H functionalization of 4-cyclobutyl-2,6-dimethylpyridine (40.3 mg, 0.25 mmol) by reaction of 2-(4-bromophenyl)-2-diazoacetate (186 mg, 0.50 mmol) using Rh<sub>2</sub>(S-2-Cl-5-BrTPCP)<sub>4</sub> (4.8 mg, 1 mol%) as catalyst. This procedure afforded the title compound (97 mg, 77% yield) as a colorless oil. The ratio of *cis:trans* cyclobutanes was equal to 85:15 by relative integration of the multiplets at 3.11 and 2.98 ppm in the crude <sup>1</sup>HNMR spectrum. The ratio of C3:C1 functionalization products was >95:5 by <sup>1</sup>HNMR. [ $\alpha$ ]<sub>D</sub><sup>23</sup> + 69.4 (c 1.00, CHCl<sub>3</sub>); <sup>1</sup>H NMR (600 MHz, Chloroform-d)  $\delta$  7.43 (d,  $J$  = 8.0 Hz, 2H), 7.18 (d,  $J$  = 8.1 Hz, 2H), 6.68 (s, 2H), 4.73 (d,  $J$  = 11.9 Hz, 1H), 4.65 (d,  $J$  = 11.9 Hz, 1H), 3.57 (d,  $J$  = 10.7 Hz, 1H), 3.27 (p,  $J$  = 9.1 Hz, 1H), 2.98 (qd,  $J$  = 10.1, 5.0 Hz, 1H), 2.65 (dtd,  $J$  = 12.1, 7.6, 4.7 Hz, 1H), 2.45 (s, 6H), 2.23 (dtd,  $J$  = 12.3, 7.6, 4.7 Hz, 1H), 1.93 (q,  $J$  = 10.2 Hz, 1H), 1.68

(t, J = 10.3 Hz, 1H).  $^{13}\text{C}$  NMR (151 MHz,  $\text{cdCl}_3$ )  $\delta$  170.70, 157.56, 154.16, 135.02, 131.81, 129.88, 121.74, 118.08, 94.68, 74.01, 57.41, 34.68, 34.28, 34.10, 33.19, 24.39. IR (neat) 2965, 2926, 2854, 1749, 1606, 1564, 1488, 1136, 1173, 1101, 826, 763, 718  $\text{cm}^{-1}$ . MS (ESI+) 503.9894 (503.9894 calcd for  $\text{C}_{21}\text{H}_{22}\text{O}_2\text{N}^{79}\text{Br}^{35}\text{Cl}_3$ ,  $\text{M} + \text{H}^+$ ) The enantiopurity was determined to be 93% ee by chiral HPLC (Chiralpak AD-H, 25 cm x 4.6 mm, 2.0% IPA/Hexanes, 1.0 mL/min,  $\lambda$  230 nm, RT= 18.2 and 20.8 min)

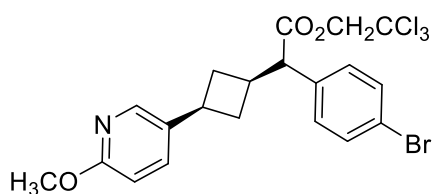

**2,2,2-trichloroethyl (S)-2-(4-bromophenyl)-2-((1S,3R)-3-(6-methoxypyridin-3-yl)cyclobutyl)acetate (32).** The general procedure 2 was employed for the C-H functionalization of 5-cyclobutyl-2-methoxypyridine (40.8 mg, 0.25 mmol) by reaction of 2-(4-bromophenyl)-2-diazoacetate (186 mg, 0.50 mmol) using  $\text{Rh}_2(\text{S-2-Cl-5-BrTPCP})_4$  (4.8 mg, 1 mol%) as catalyst. This procedure afforded the title compound (69 mg, 54% yield) as a colorless oil. The ratio of *cis:trans* cyclobutanes was equal to 92:8 by relative integration of the multiplets at 2.97 and 3.05 ppm in the crude  $^1\text{H}$ NMR spectrum. The ratio of C3:C1 functionalization products was equal to 78:22 by relative integration of the multiplets at 2.41 and 3.32 ppm in the crude  $^1\text{H}$ NMR spectrum.  $[\alpha]^{23}_{\text{D}} + 70.5$  (c 1.00,  $\text{CHCl}_3$ );  $^1\text{H}$  NMR (500 MHz, Chloroform- $d$ )  $\delta$  8.02 – 7.92 (m, 1H), 7.52 – 7.43 (m, 2H), 7.39 (ddd, J = 8.5, 2.5, 0.6 Hz, 1H), 7.29 – 7.19 (m, 2H), 6.68 (dd, J = 8.4, 0.8 Hz, 1H), 4.77 (d, J = 12.0 Hz, 1H), 4.68 (d, J = 11.9 Hz, 1H), 3.90 (s, 2H), 3.62 (d, J = 10.7 Hz, 1H), 3.33 (tt, J = 10.1, 8.0 Hz, 1H), 2.99 (dtt, J = 10.6, 9.6, 7.4 Hz, 1H), 2.73 – 2.62 (m,

1H), 2.33 – 2.21 (m, 1H), 1.95 (q, J = 10.2 Hz, 1H), 1.66 (d, J = 10.3 Hz, 1H). <sup>13</sup>C NMR (126 MHz, CDCl<sub>3</sub>) δ 170.78, 162.78, 144.50, 136.85, 135.14, 132.67, 131.82, 129.91, 121.74, 110.46, 94.72, 74.06, 57.50, 53.34, 35.17, 34.21, 32.74. IR (neat) 2966, 2944, 2857, 1748, 1607, 1571, 1493, 1374, 1329, 1284, 1258, 1135, 1028, 1012, 830, 761, 721 cm<sup>-1</sup>. MS (ESI+) X (X calcd for C<sub>21</sub>H<sub>22</sub>O<sub>2</sub>N<sup>79</sup>Br<sup>35</sup>Cl<sub>3</sub>, M + H<sup>+</sup>) The enantiopurity was determined to be 92% ee by chiral HPLC (Chiralpak AD-H, 25 cm x 4.6 mm, 3.0% IPA/Hexanes, 1.0 mL/min, λ 230 nm, RT= 10.7 and 20.1 min)

## Procedure for Determining Relative Rates of C-H Functionalization

For both  $\text{Rh}_2(R\text{-TCPTAD})_4$  and  $\text{Rh}_2[(S)\text{-2-Cl-5-BrTPCP}]_4$  catalysts, reactions were conducted according to General Procedure 2 using an equimolar mixture of 4-tertbutylphenyl cyclobutane (1.50 equiv, 70.6 mg, 0.375 mmol) and either 4-ethyltoluene (1.50 equiv, 45.1 mg, 0.375 mmol) or 4-isopropyltoluene (1.50 equiv, 50.3 mg, 0.375 mmol) with 2,2,2-trichloroethyl 4-bromophenyldiazoacetate (1.00 equiv, 93.1 mg, 0.250 mmol) as the diazo component. On completion of the reaction, the mixtures were concentrated under vacuum and the resulting green oils were analyzed by  $^1\text{H}$  NMR in  $\text{CDCl}_3$  solvent containing 0.3% TMS (v/v) with a relaxation delay of 10 s. The relative rates of C-H functionalization were assumed to correspond to the ratios of the products observed in the crude mixture. The signals at the following chemical shifts were used to determine the ratios:

2,2,2-trichloroethyl 2-(4-bromophenyl)-2-(1-(4-(tert-butyl)phenyl)cyclobutyl)acetate: 4.00 ppm, (s, 1 H) or 2.48 ppm (*m*, 1 H)

2,2,2-trichloroethyl 2-(4-bromophenyl)-2-(3-(4-(tert-butyl)phenyl)cyclobutyl)acetate: 3.63 ppm (*d*, 1 H)

2,2,2-trichloroethyl 2-(4-bromophenyl)-3-(*p*-tolyl)butanoate: 3.83 ppm (*d*, 1 H, with overlap of both diastereomers)

2,2,2-trichloroethyl 2-(4-bromophenyl)-3-(4-ethylphenyl)propanoate: 3.06 ppm (*dd*, 1 H)

2,2,2-trichloroethyl 2-(4-bromophenyl)-3-methyl-3-(*p*-tolyl)butanoate: 3.99 ppm (s, 1 H), 4.46 ppm (*d*, 1 H), or 2.30 ppm (s, 3 H)

2,2,2-trichloroethyl 2-(4-bromophenyl)-3-(4-isopropylphenyl)propanoate: 3.06 ppm (*dd*, 1 H)

## NMR Spectra for Relative Rates Study

**Figure S21.** The reaction with 4-tert-butylphenyl cyclobutane and 4-ethyltoluene using  $\text{Rh}_2[(R)\text{-TCPTAD}]_4$  as the catalyst.

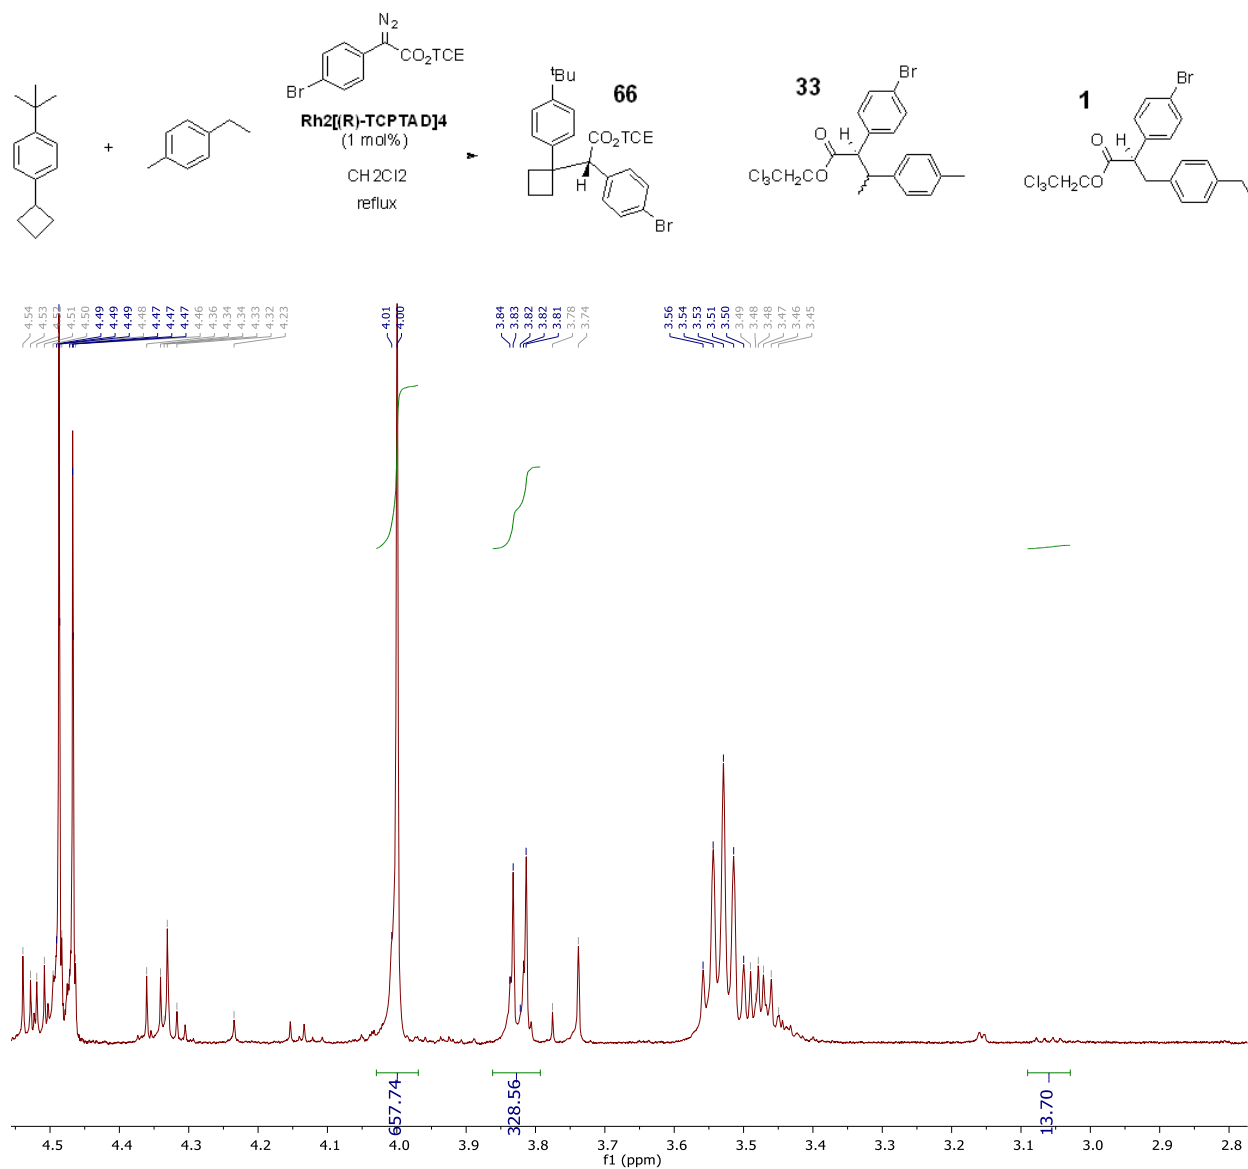

**Figure S22.** The reaction with 4-tert-butylphenylcyclobutane and 4-isopropyltoluene using  $\text{Rh}_2[(R)\text{-TCPTAD}]_4$  as the catalyst.

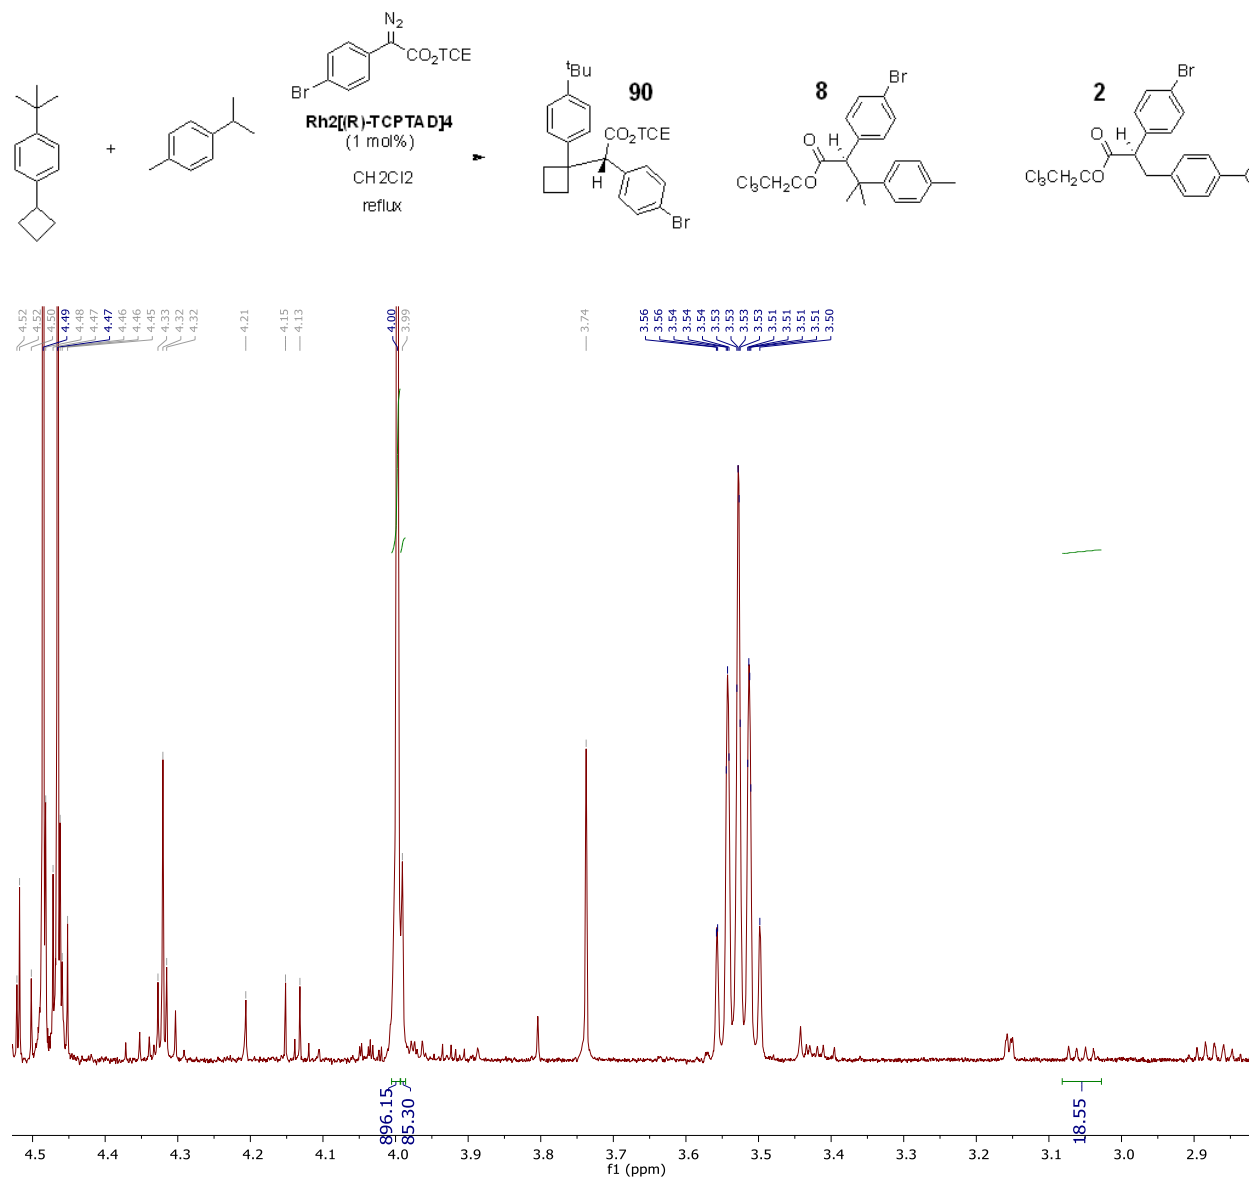

**Figure S23.** The reaction with 4-tert-butylphenyl cyclobutane and 4-ethyltoluene using  $\text{Rh}_2[(\text{S})\text{-2-Cl-5-BrTPCP}]_4$  as the catalyst.

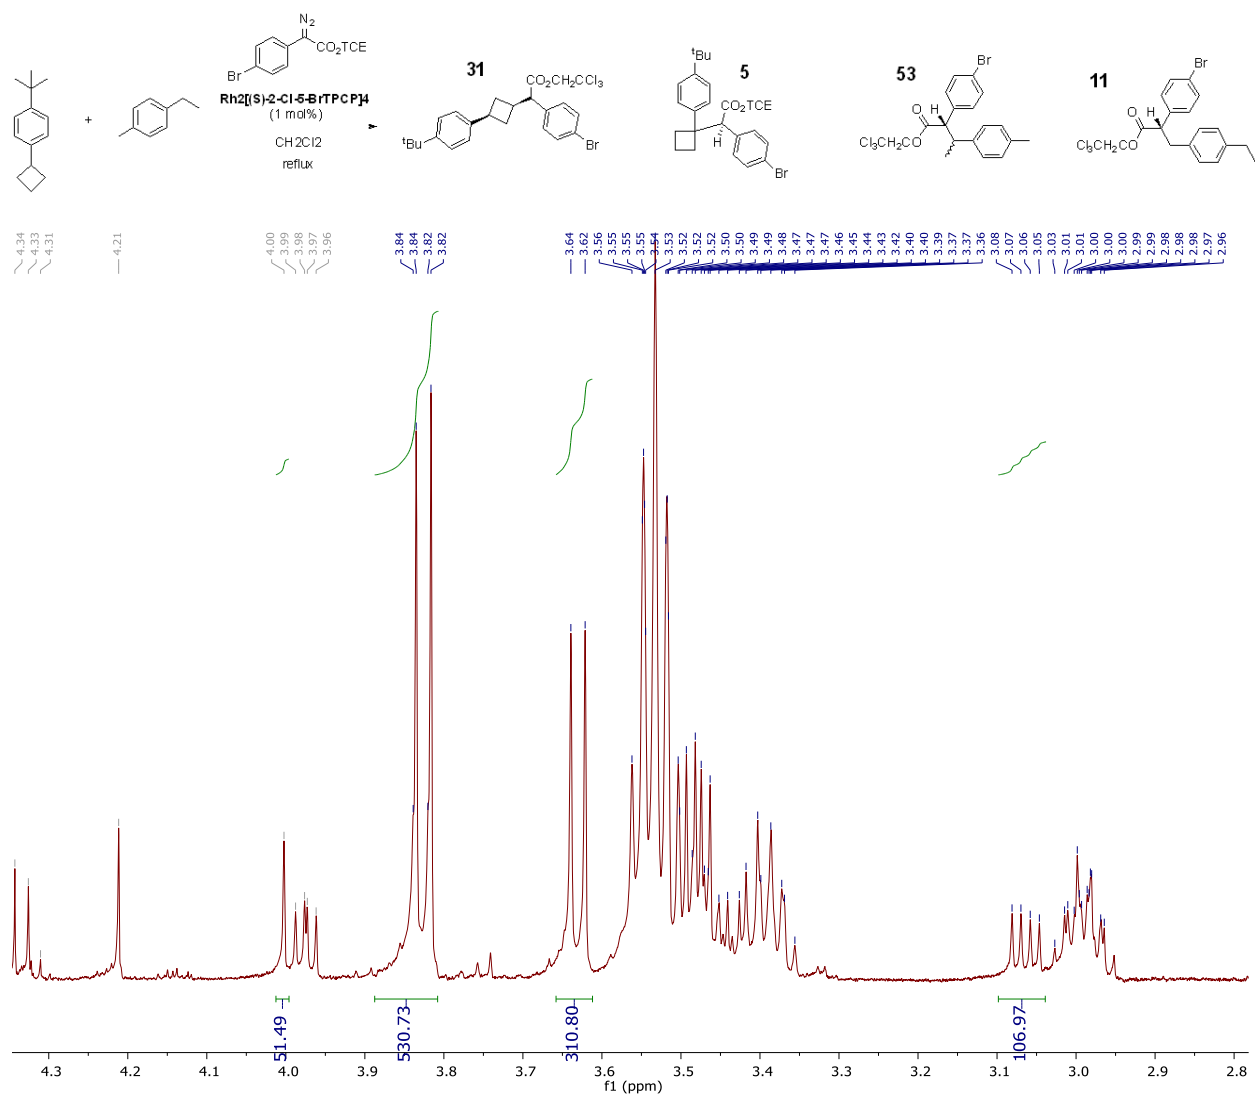

**Figure S24.** The reaction with 4-tert-butylphenyl cyclobutane and 4-isopropyltoluene using  $\text{Rh}_2[(S)\text{-}2\text{-Cl-}5\text{-BrTPCP}]_4$  as the catalyst.

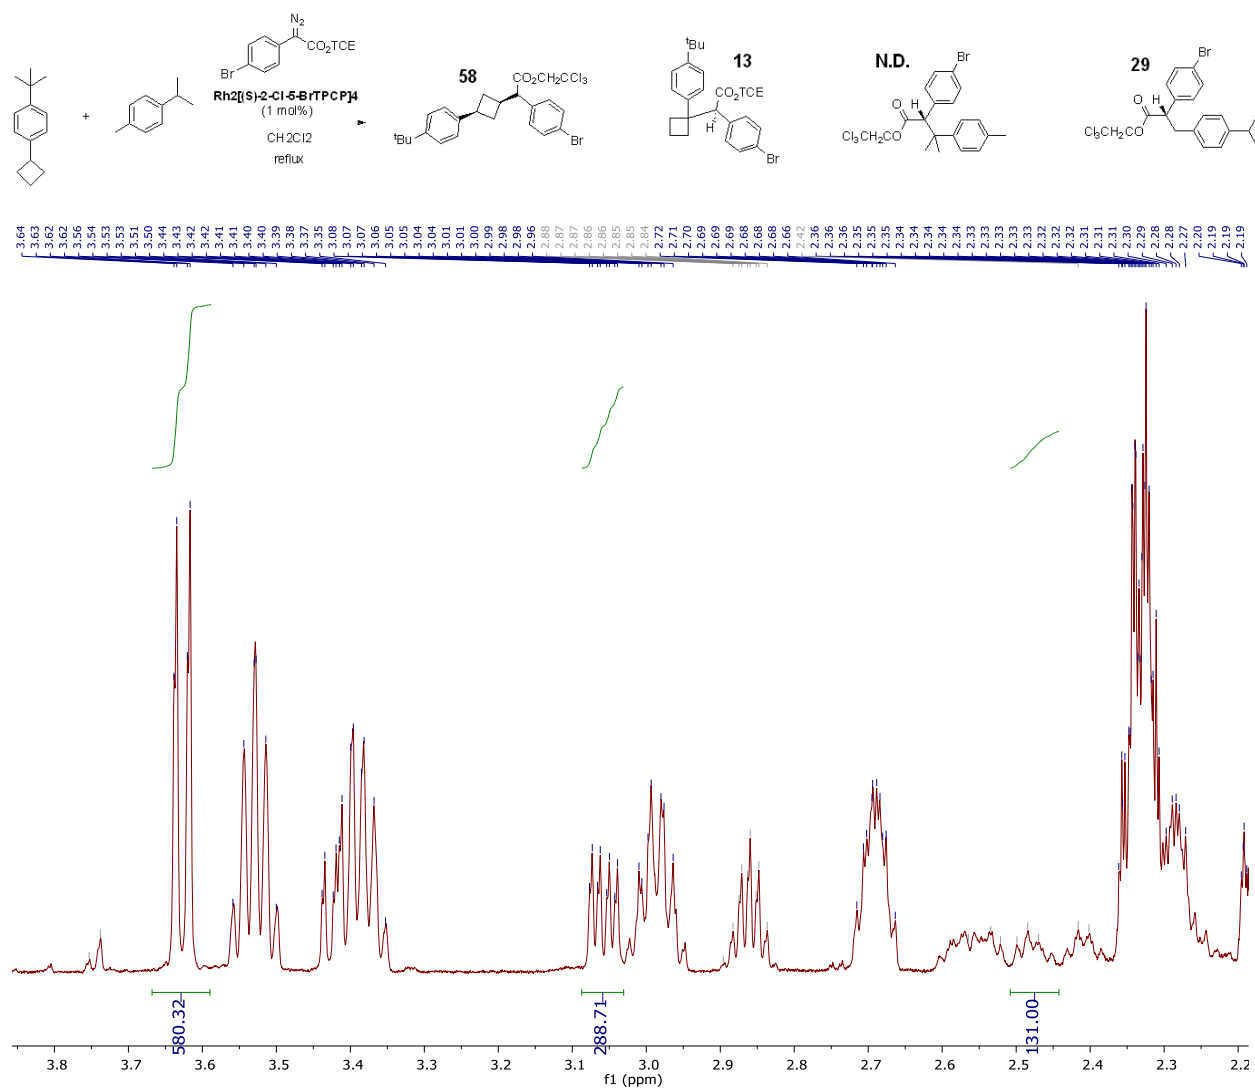

## Determination of Absolute Configuration

Approximately 10 mg of **8** which was synthesized with  $\text{Rh}_2(\text{S-TCPTAD})_4$  was placed in a 1 dram vial and was dissolved in hexanes. The solution was capped with a slight crack to allow slow evaporation leaving crystals. X-ray crystallographic analysis unveiled that the configuration was S.

**Figure S25.** Solid state structure of compound **8**.

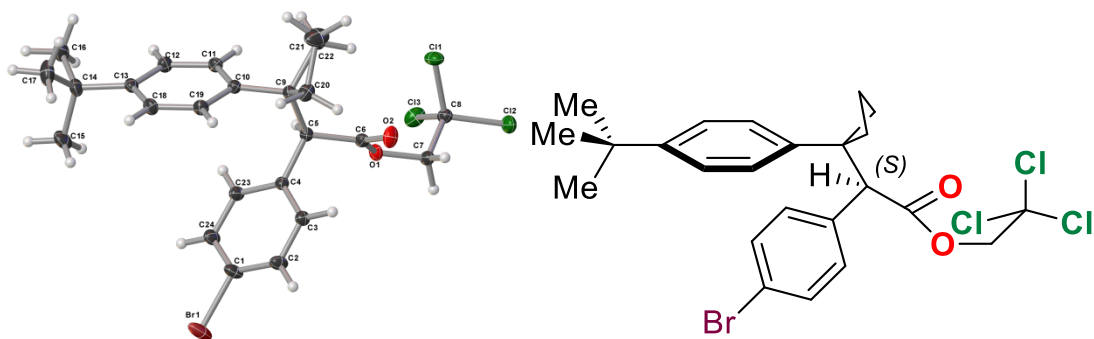

Approximately **50** mg of **25** which was synthesized with  $\text{Rh}_2(\text{S-2Cl-5Br-TPCP})_4$  was placed in a 20 ml vial and dissolved in hexanes. Over time, small needles were formed which were sufficient for determining the absolute and relative configuration. This configuration was confirmed by nOe analysis.

**Figure S26.** Solid state structure of compound **26**.

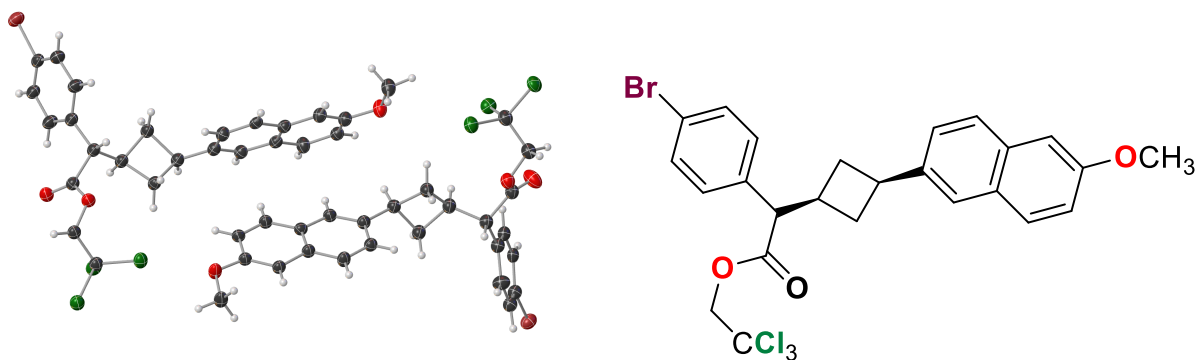

## References

1. Davies, H. M. L.; Bruzinski, P. R.; Lake, D. H.; Kong, N.; Fall, M. J. *J. Am. Chem. Soc.* **1996**, *118*, 6897–6907.
2. Fu, J.; Ren, Z.; Bacsa, J.; Musaev, D. G.; Davies, H. M. L. *Nature*, **2018**, *564*, 395–399.
3. Reddy, R. P.; Lee, G. H.; Davies, H. M. L. *Org. Lett.* **2006**, *8*, 3437–3440.
4. Reddy, R. P.; Davies, H. M. L. *Org. Lett.* **2006**, *8*, 5013–5016.
5. Liao, K.; Negretti, S.; Musaev, D. G.; Bacsa, J.; Davies, H. M. L. *Nature*, **2016**, *533*, 230–234.
6. Qin, C.; Davies, H. M. L. *J. Am. Chem. Soc.* **2014**, *136*, 9792–9796.
7. Liu, W.; Ren, Z.; Bosse, A. T.; Liao, K.; Goldstein, E. L.; Bacsa, J.; Musaev, D. G.; Stoltz, B. M.; Davies, H. M. L. *J. Am. Chem. Soc.* **2018**, *140*, 12247–12255.
8. Fu, L.; Hoang, K.; Tortoreto, C.; Liu, W.; Davies, H. M. L. *Org. Lett.* **2018**, *20*, 2399–2402.
9. Guptill, D. M.; Davies, H. M. L. *J. Am. Chem. Soc.* **2014**, *136*, 17718–17721.
10. Fu, L.; Mighion, J. D.; Voight, E. A.; Davies, H. M. L. *Chem. Eur. J.* **2017**, *23*, 3272–3275.
11. Molander, G. A.; Colombel, V.; Braz, V. *Org. Lett.* **2011**, *13*, p. 1852-1855.
12. Molander, G. A.; Gormisky, P. E. *J. Org. Chem.* **2008**, *73*, p. 7481-7485.
13. Song, J. J.; Yee, N. K.; Tan, Z.; Xu, J.; Kapadia, S. R.; Senanayake, C. H. *Org. Lett.* **2004**, *6*(26), p. 4905-4907
14. Ren, R.; Zhao, H.; Huan, L.; Zhu, C. *Angew. Chem. Int. Ed.* **2015**, *54*, # 12692–12696.
15. Chen, H. ; Hu, L.; Ji, W.; Yao, L.; Liao, X. *ACS Catal.* **2018**, *8*, 10479–10485.
16. Zhao, R.; Yao, Y.; Zhu, D.; Chang, D.; Liu, Y.; Shi, L. *Org. Lett.* **2018**, *20*, 1228–1231.
17. Too, P. C.; Chan, G. H.; Tnay, Y. L.; Hirao, H.; Chiba, S. *Angew. Chem. Int. Ed.* **2016**, *55*, 3719–3723.

18. Zeng, H.; Pan, P.; Chen, J.; Gong, H.; Li, C. *Eur. J. Org. Chem.* **2017**, 1070–1073.
19. Abdiaj, I.; Fontana, A.; Gomez, M. V.; de la Hoz, A.; Alcázar, J. *Angew. Chem. Int. Ed.* **2018**, 57, 8473–8477.
20. Sun, Y.; Huang, X.; Li, X.; Luo, F.; Zhang, L.; Chen, M.; Zheng, S.; Peng, B. *Advanced Synthesis & Catal.* **2018**, 360, 1082–1087.
21. Cornella, J.; Edwards, J. T.; Qin, T.; Kawamura, K.; Wang, J.; Pan, C.-M.; Gianatassio, R.; Schmidt, M.; Eastgate, M. D.; Baran, P. S. *J. Am. Chem. Soc.* **2016**, 138, 2174–2177.

## Nuclear Magnetic Resonance Spectra

**Figure S27.**  $^1\text{H}$  NMR Spectrum of 1-cyclobutyl-4-methylbenzene in  $\text{CDCl}_3$ .

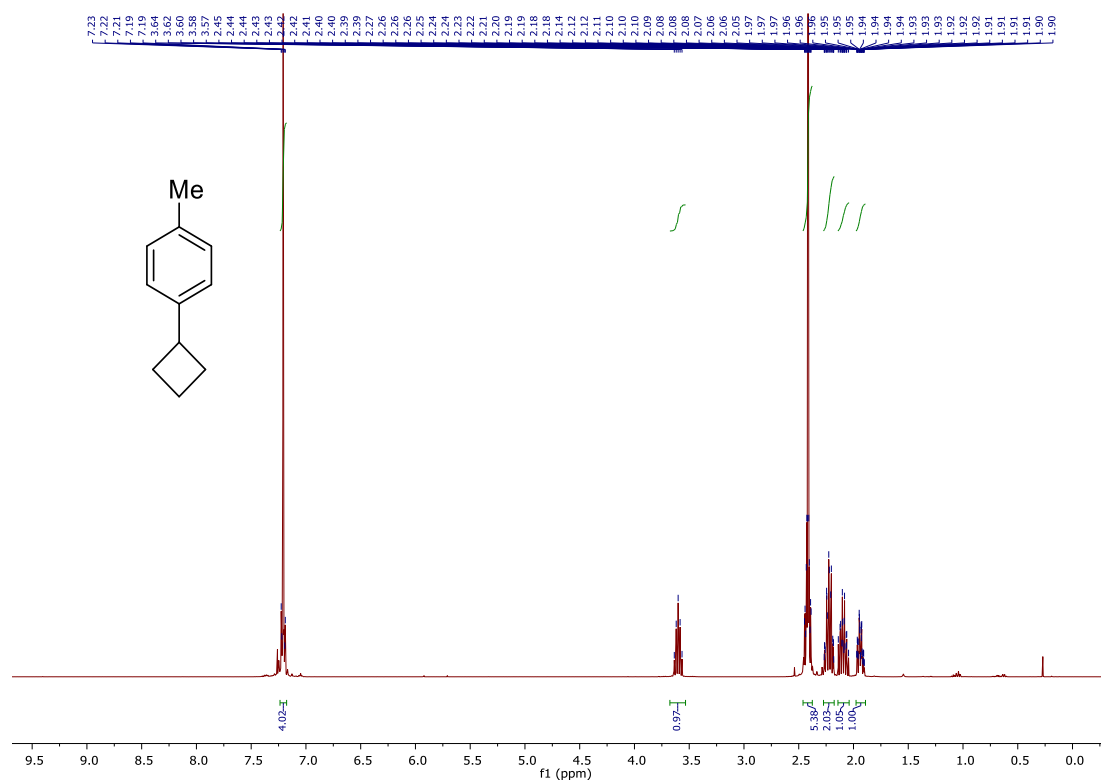

**Figure S28.**  $^{13}\text{C}$  NMR spectrum of 1-cyclobutyl-4-methylbenzene in  $\text{CDCl}_3$ .

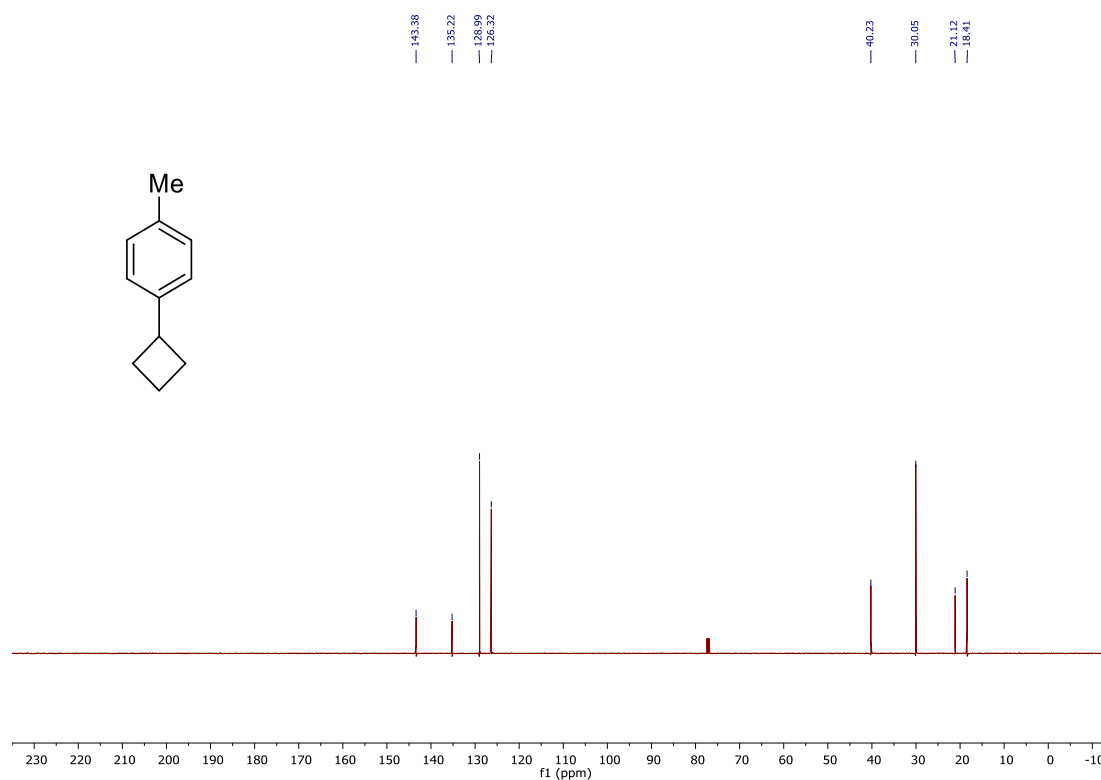

**Figure S29.**  $^1\text{H}$  NMR spectrum of 1-(6-methoxynaphthalen-2-yl)cyclobutan-1-ol in  $\text{C}_6\text{D}_6$ .

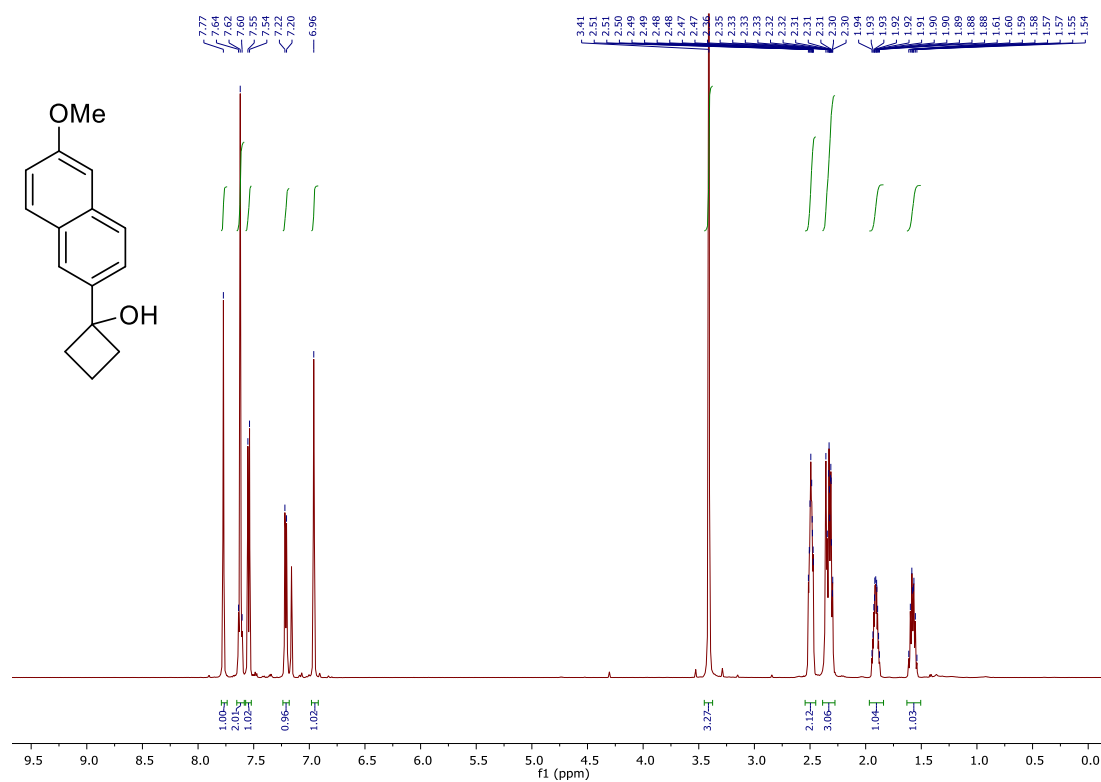

**Figure S30.**  $^{13}\text{C}$  NMR spectrum of 1-(6-methoxynaphthalen-2-yl)cyclobutan-1-ol in  $\text{C}_6\text{D}_6$ .

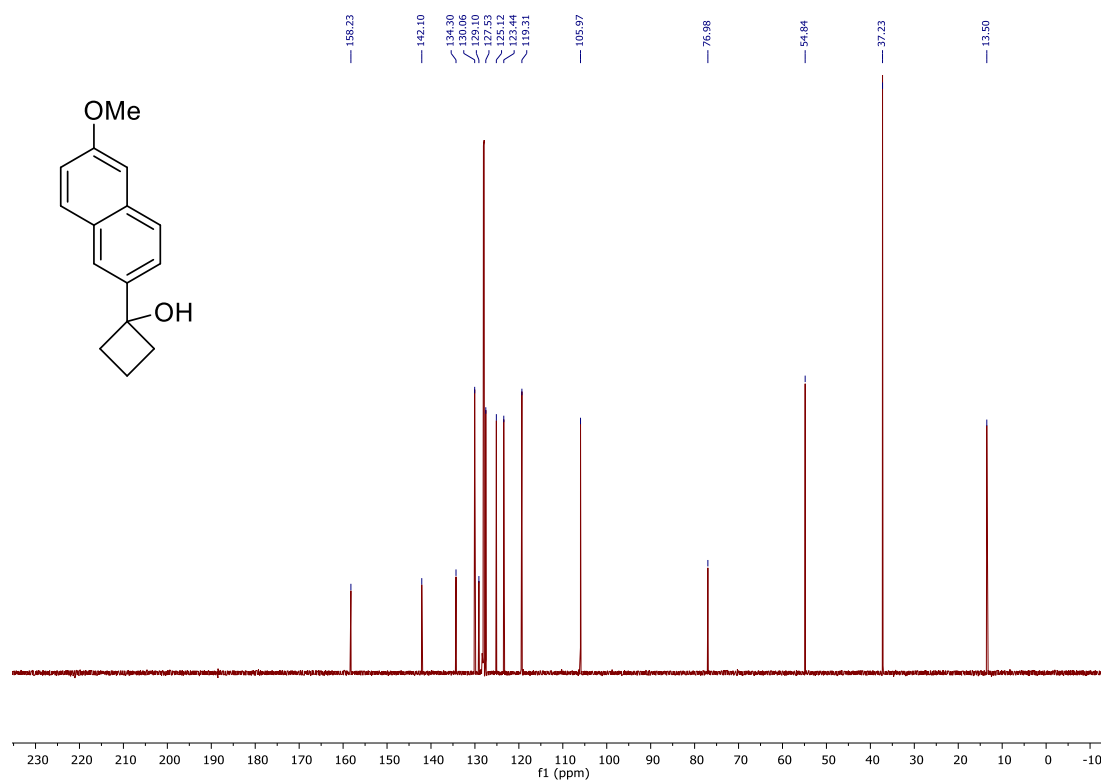

**Figure S31.**  $^1\text{H}$  NMR Spectrum of 1-(6-methoxynaphthalen-2-yl)cyclobutane in  $\text{C}_6\text{D}_6$ .

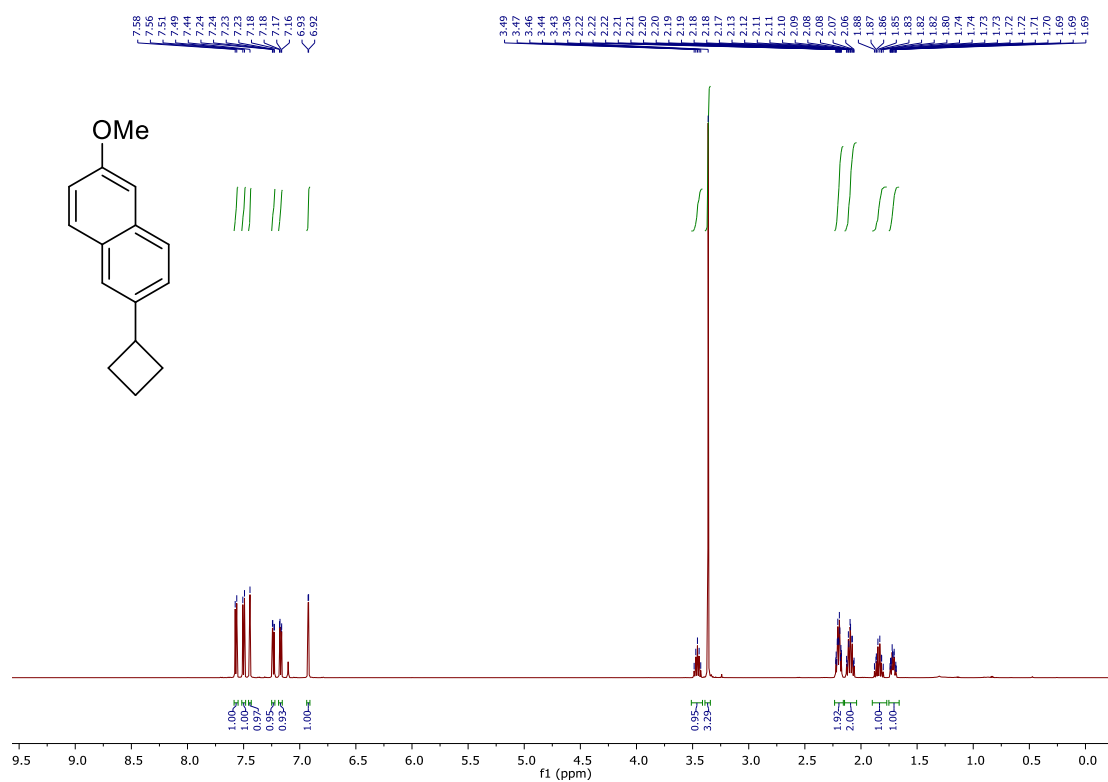

**Figure S32.**  $^{13}\text{C}$  NMR Spectrum of 1-(6-methoxynaphthalen-2-yl)cyclobutane in  $\text{C}_6\text{D}_6$ .

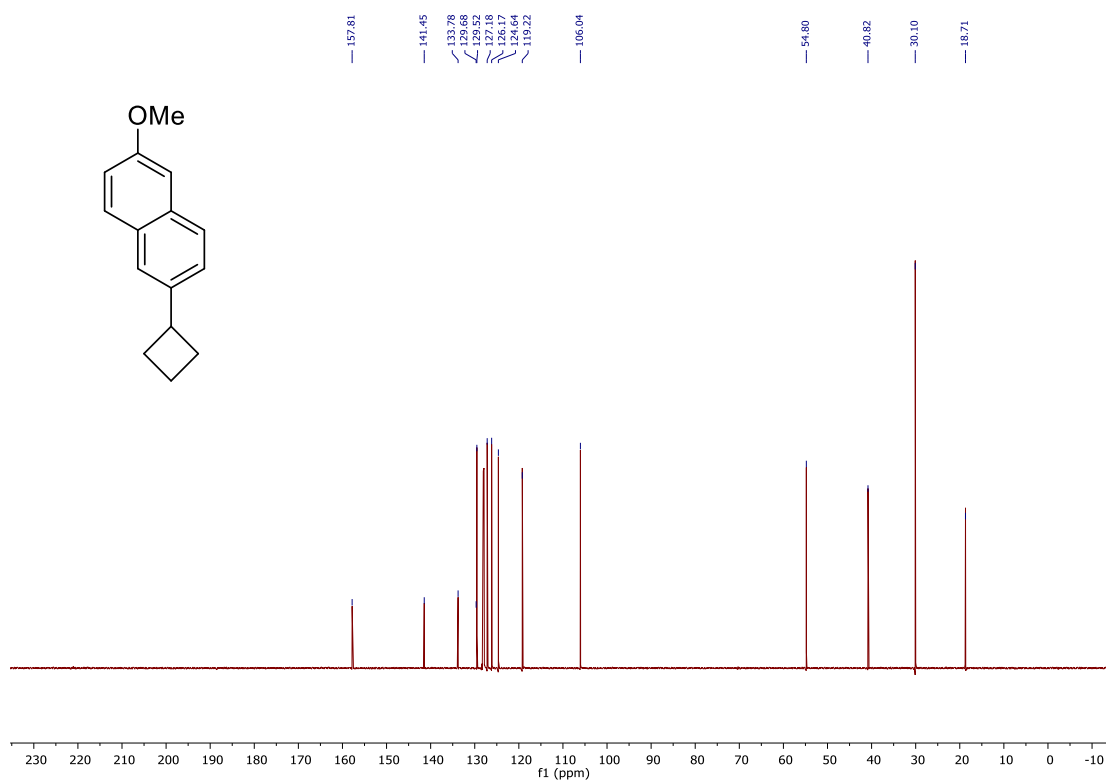

**Figure S33.**  $^1\text{H}$  NMR Spectrum of compound **10** in  $\text{CDCl}_3$ .

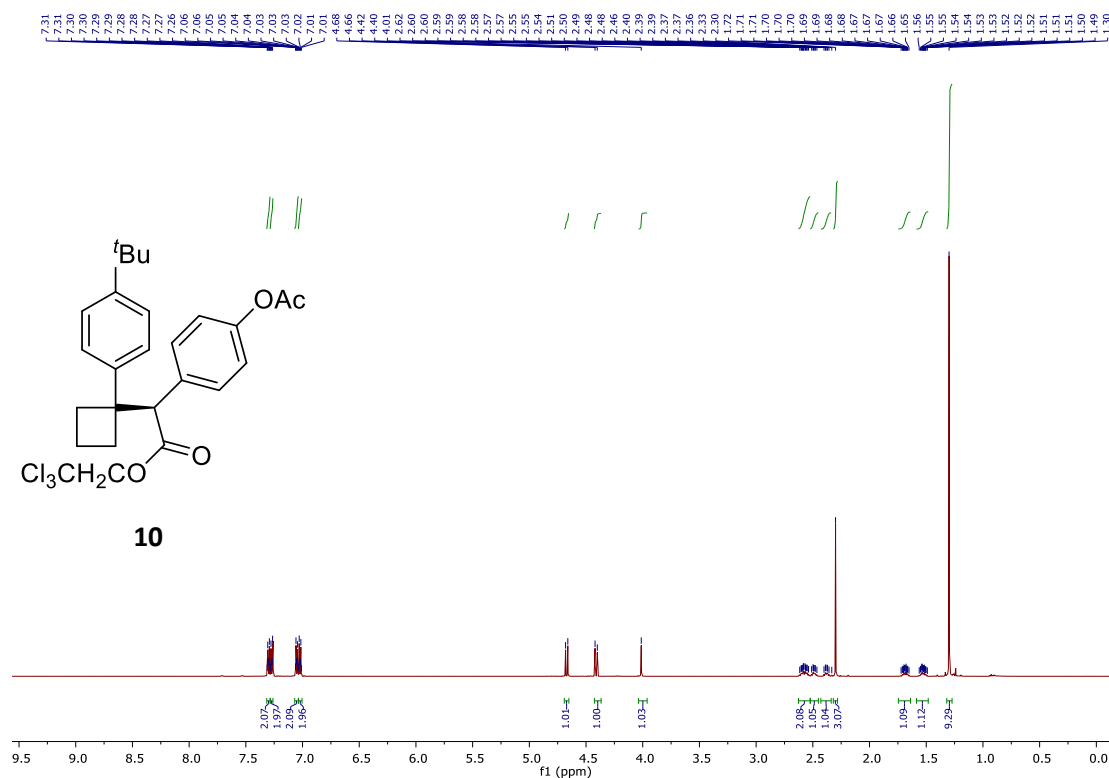

**Figure S34.**  $^{13}\text{C}$  NMR spectrum of compound **10** in  $\text{CDCl}_3$ .

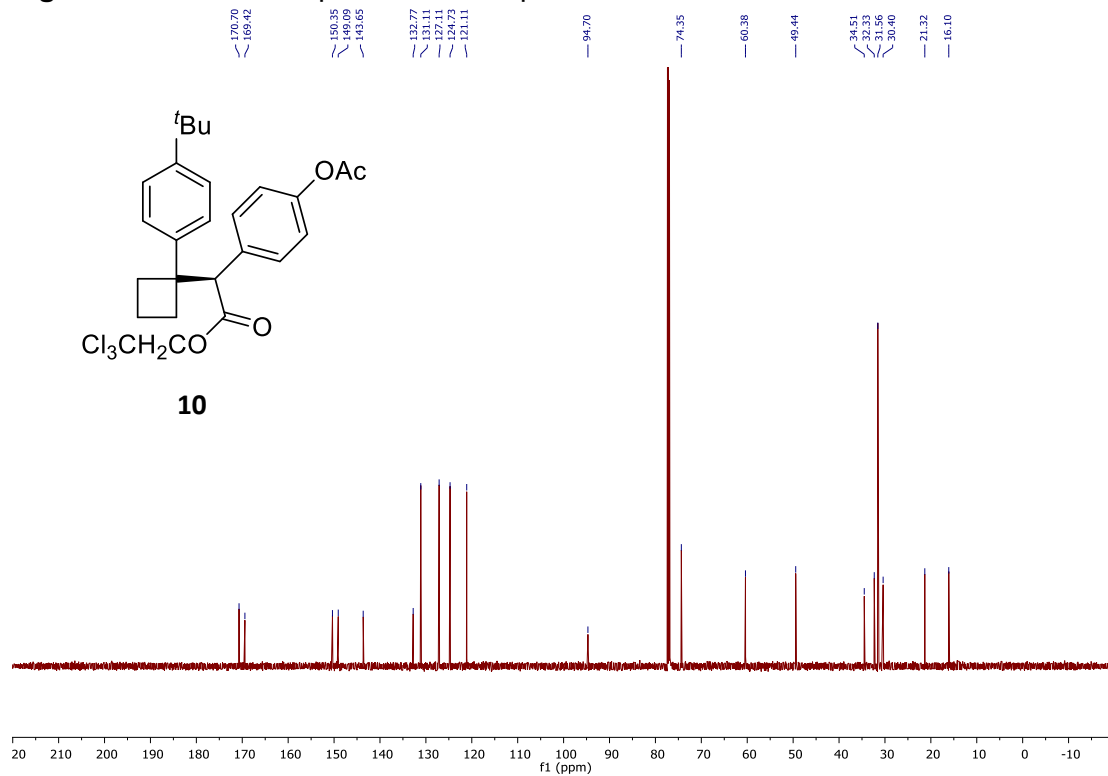

**Figure S35.**  $^1\text{H}$  NMR Spectrum of compound **11** in  $\text{CDCl}_3$ .

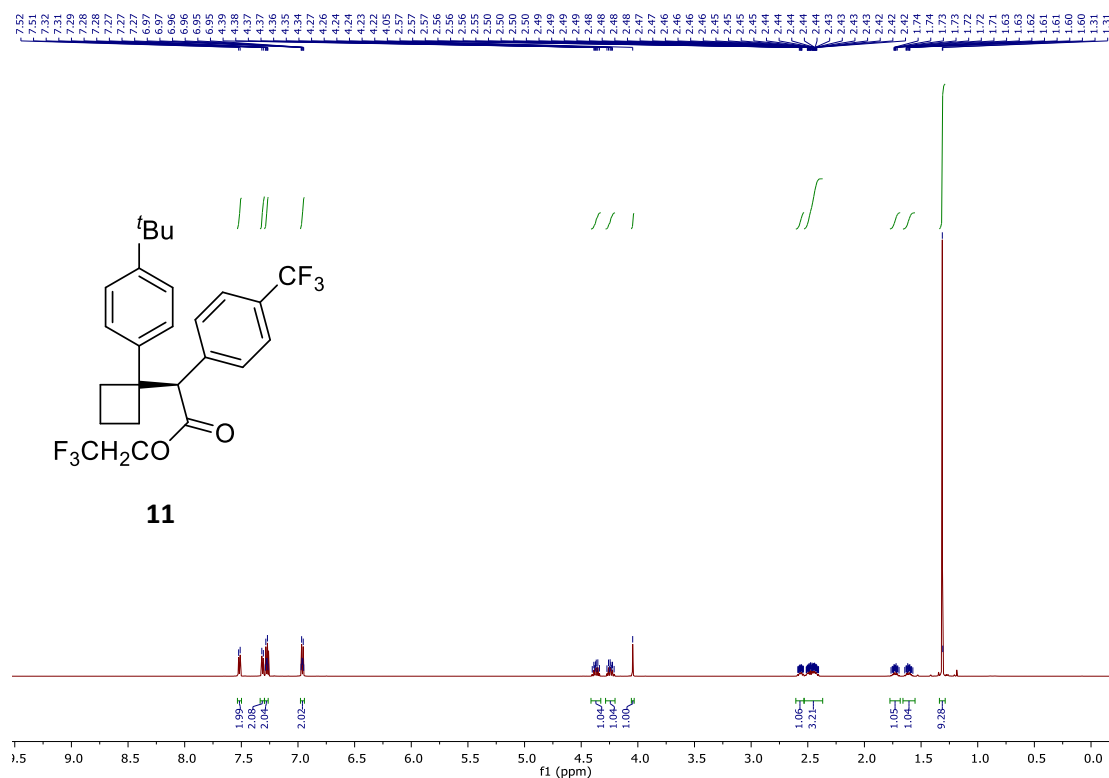

**Figure S36.**  $^{13}\text{C}$  NMR spectrum of compound **11** in  $\text{CDCl}_3$ .

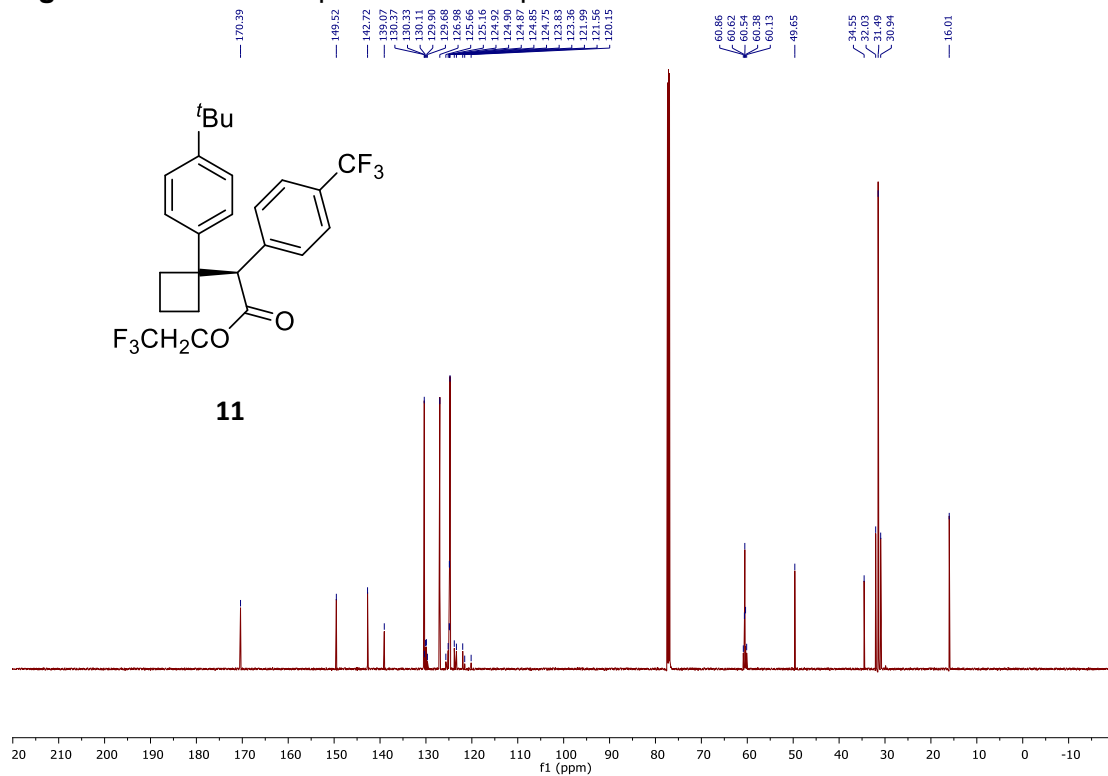

**Figure S37.**  $^{19}\text{F}$  NMR spectrum of compound **11** in  $\text{CDCl}_3$ .

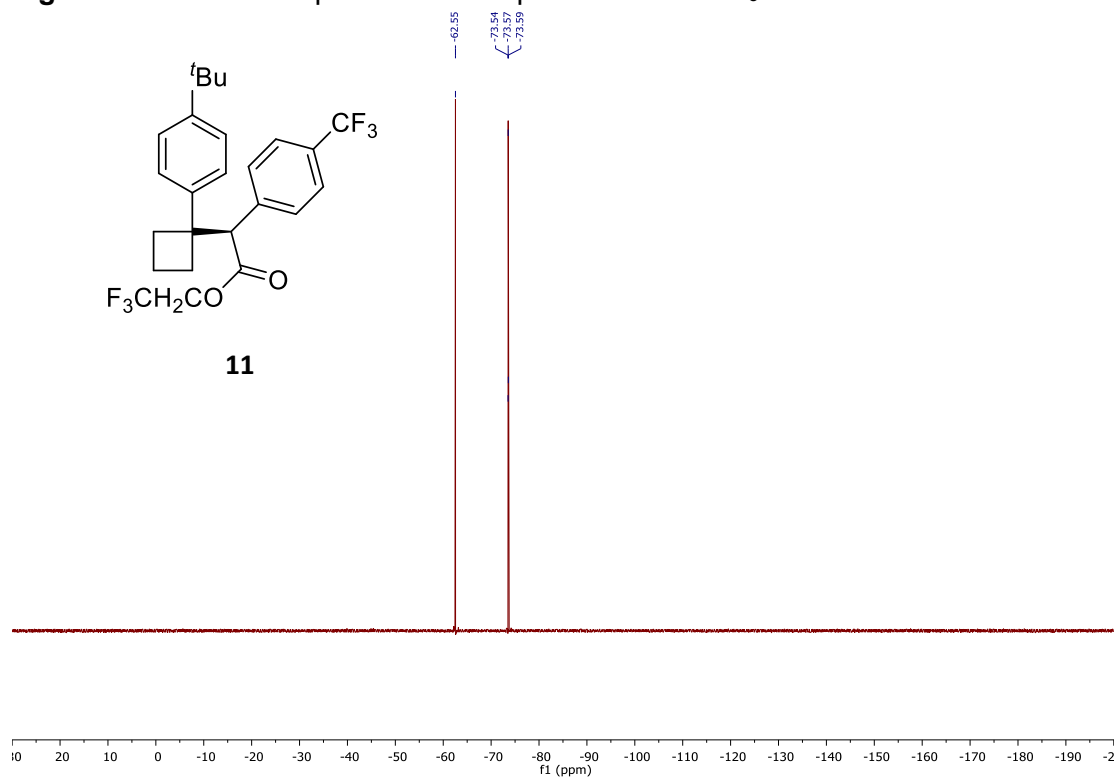

**Figure S38.**  $^1\text{H}$  NMR Spectrum of compound **12** in  $\text{CDCl}_3$ .

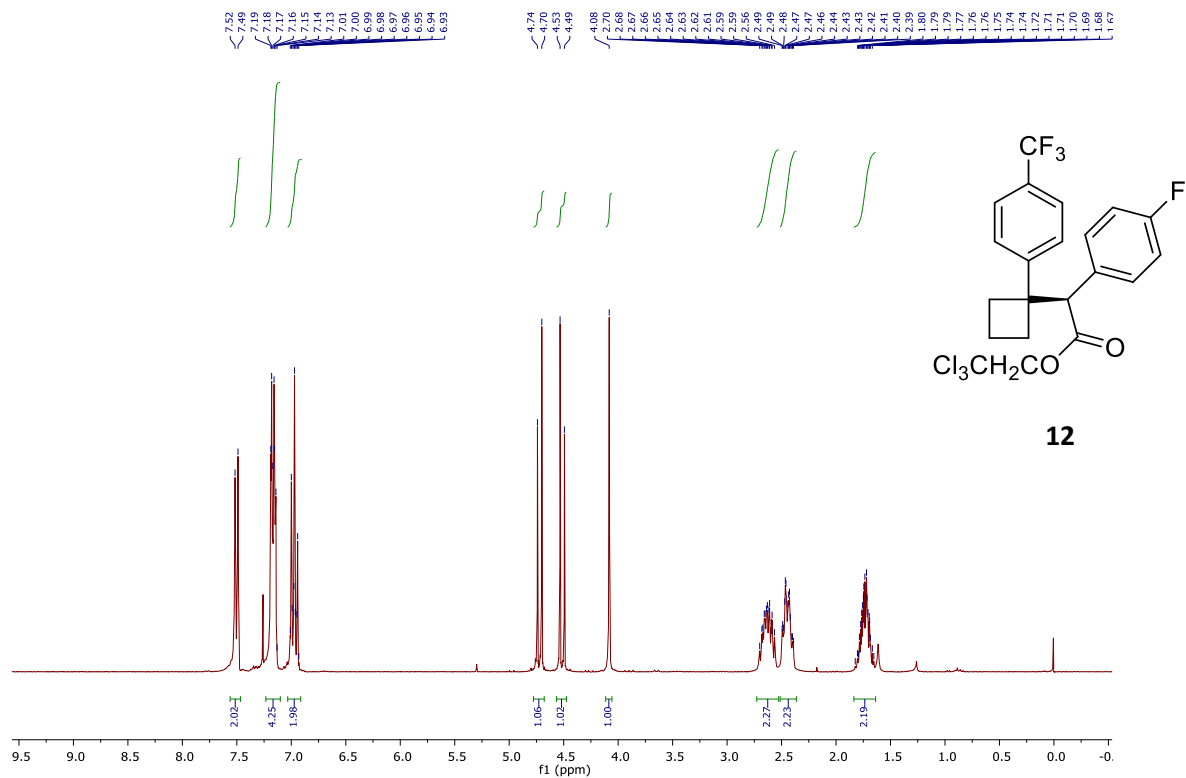

**Figure S39.**  $^{13}\text{C}$  NMR spectrum of compound **12** in  $\text{CDCl}_3$ .

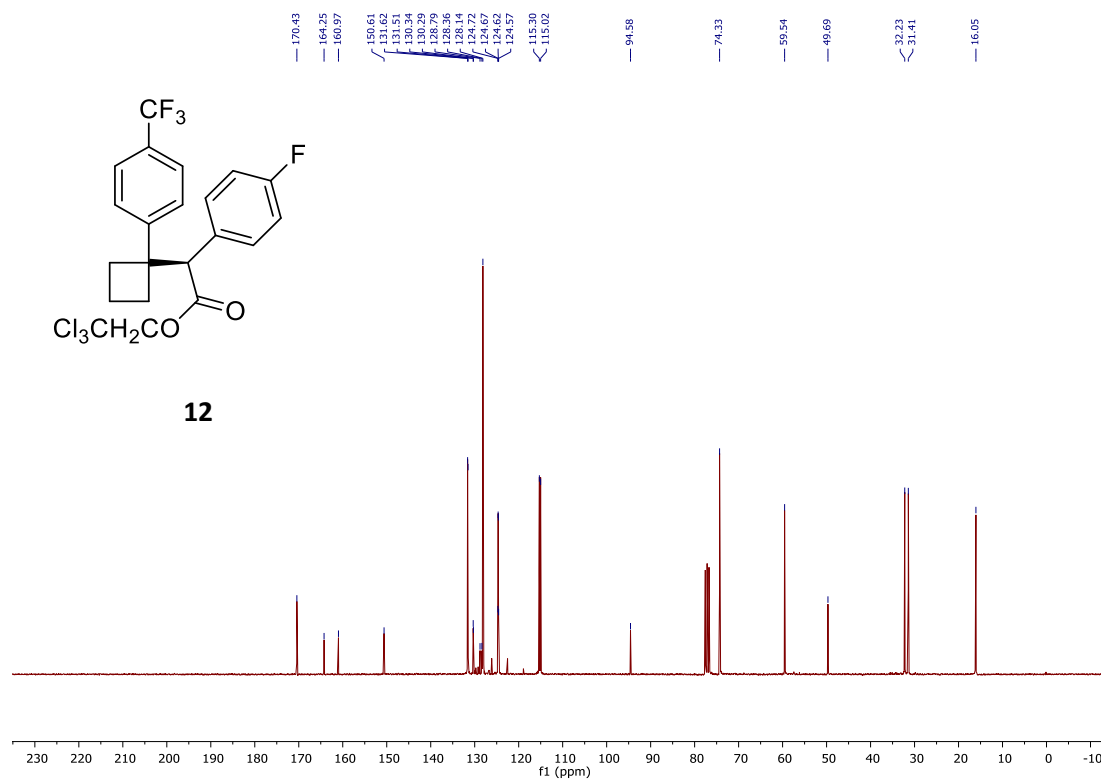

**Figure S40.**  $^{19}\text{F}$  NMR spectrum of compound **12** in  $\text{CDCl}_3$ .

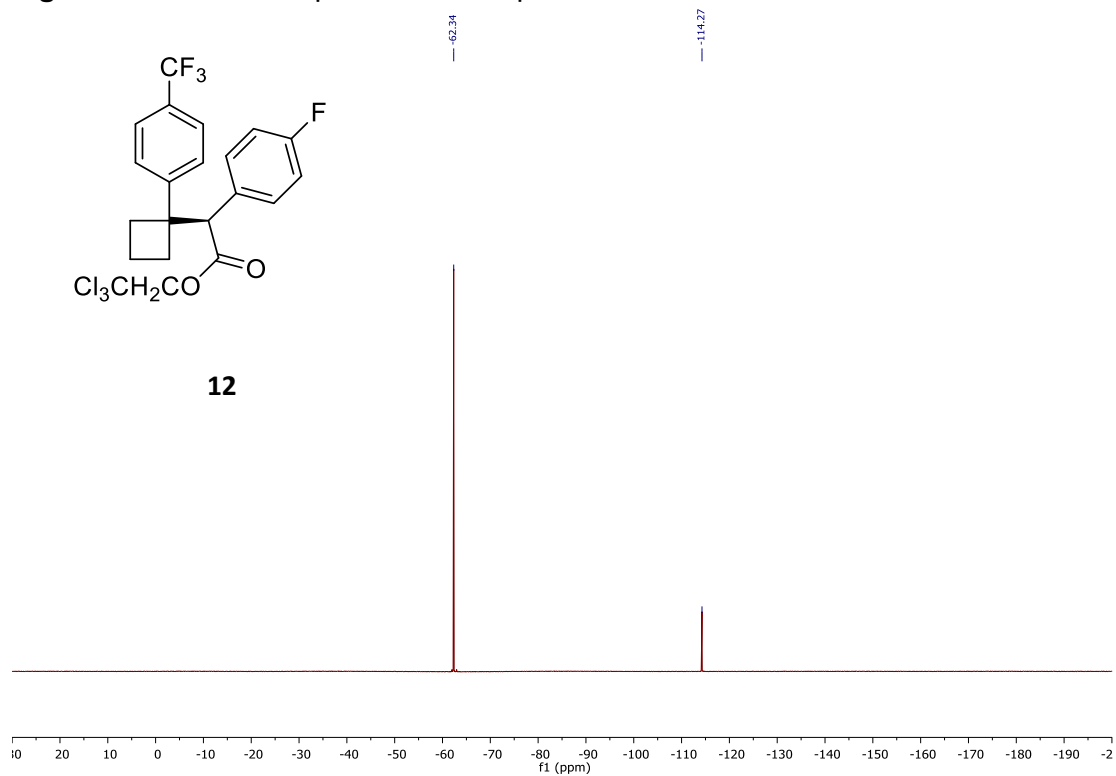

**Figure S41.**  $^1\text{H}$  NMR Spectrum of compound **13** in  $\text{CDCl}_3$ .

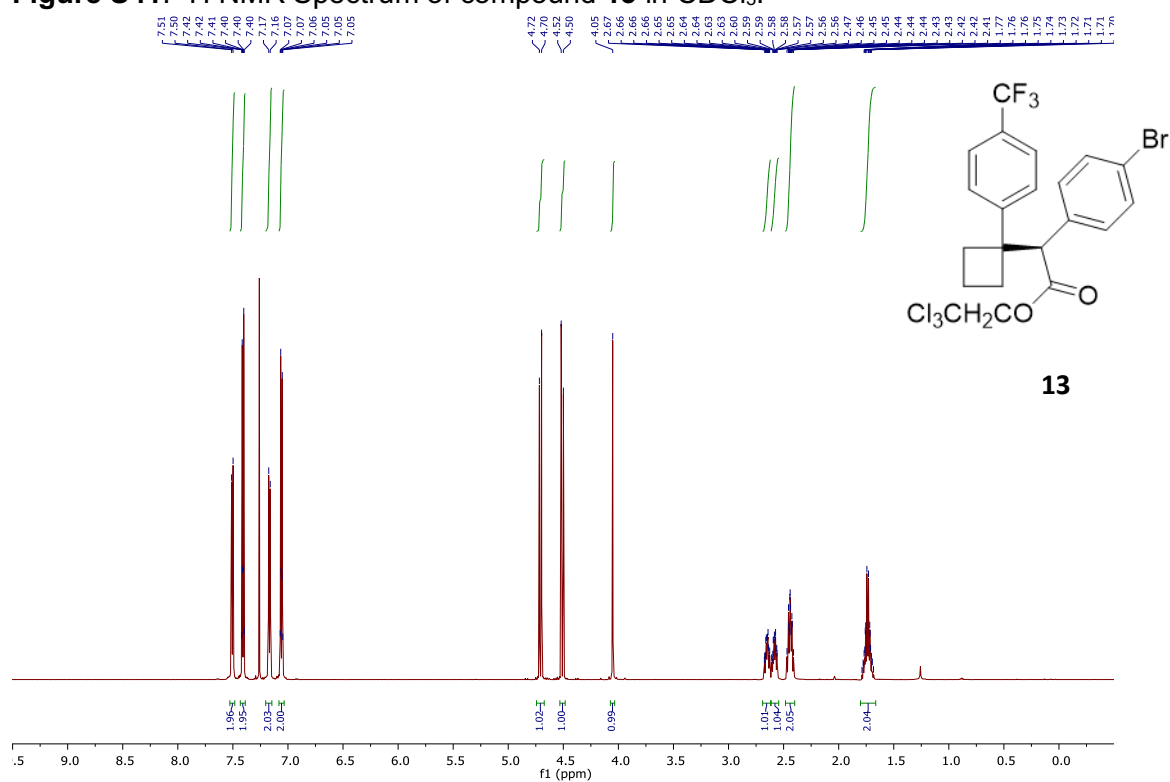

**Figure S42.**  $^{13}\text{C}$  NMR spectrum of compound **13** in  $\text{CDCl}_3$ .

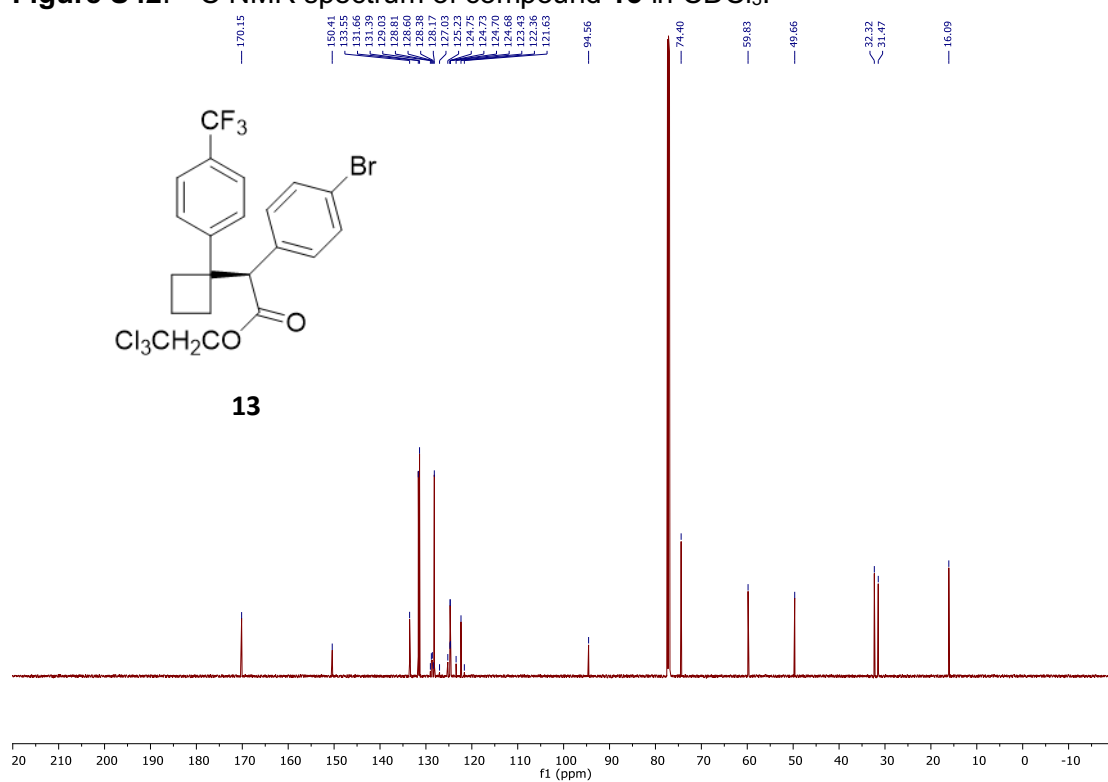

**Figure S43.**  $^{19}\text{F}$  NMR spectrum of compound **13** in  $\text{CDCl}_3$ .

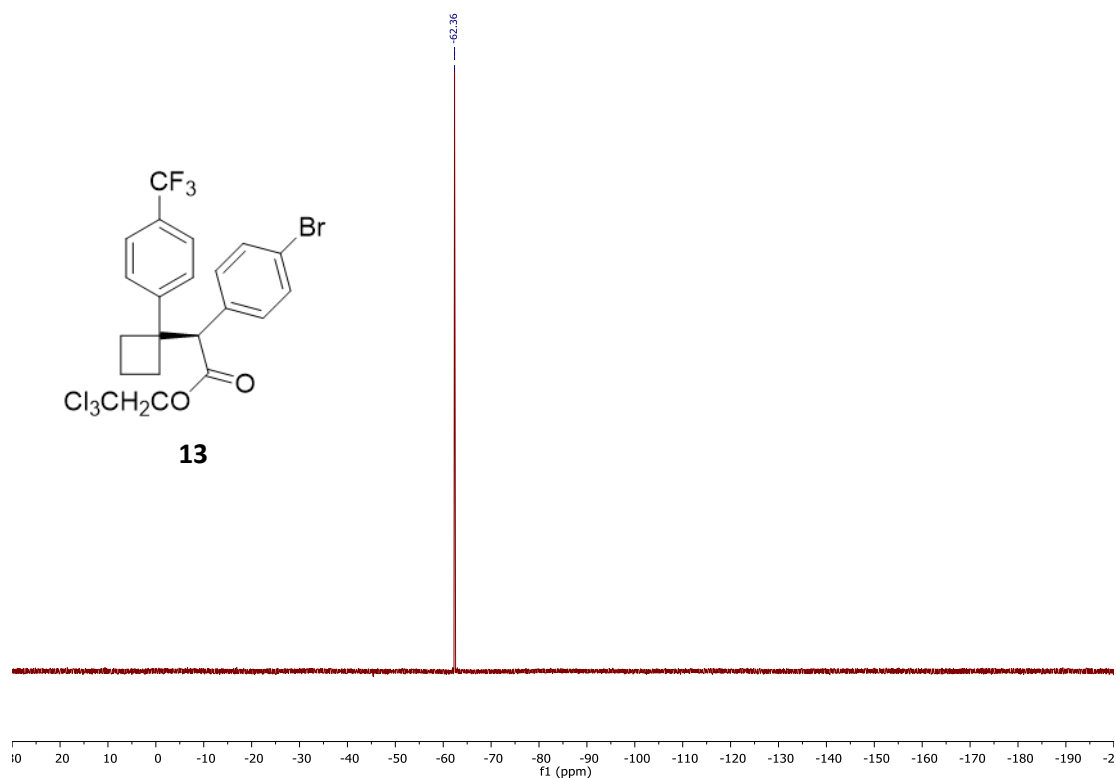

**Figure S44.**  $^1\text{H}$  NMR Spectrum of compound **14** in  $\text{CDCl}_3$ .

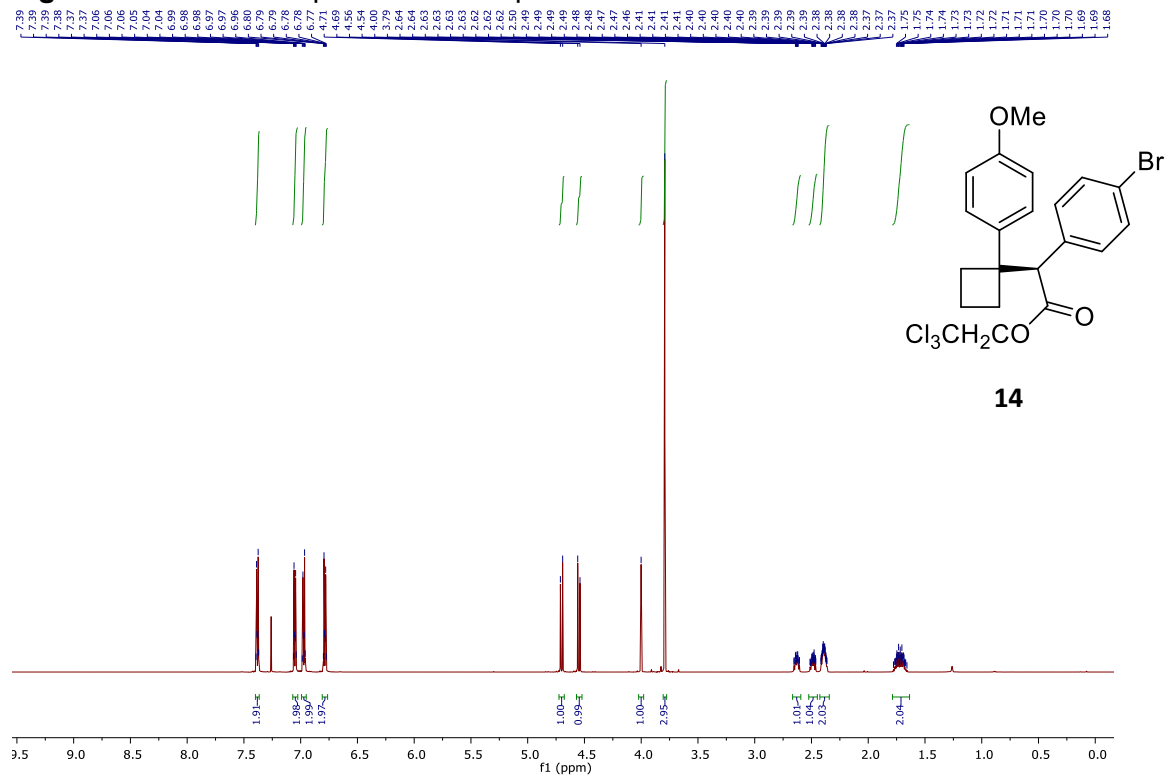

Figure S45.  $^{13}\text{C}$  NMR spectrum of compound **14** in  $\text{CDCl}_3$ .

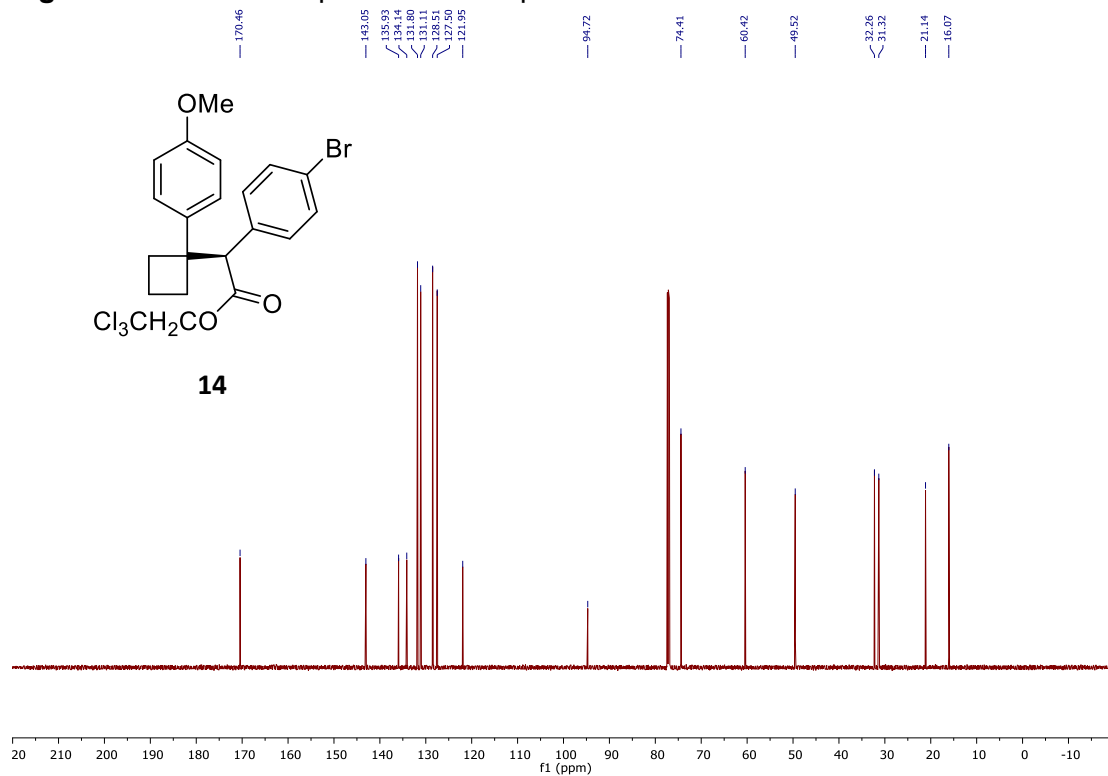

Figure S46.  $^1\text{H}$  NMR Spectrum of compound **15** in  $\text{CDCl}_3$ .

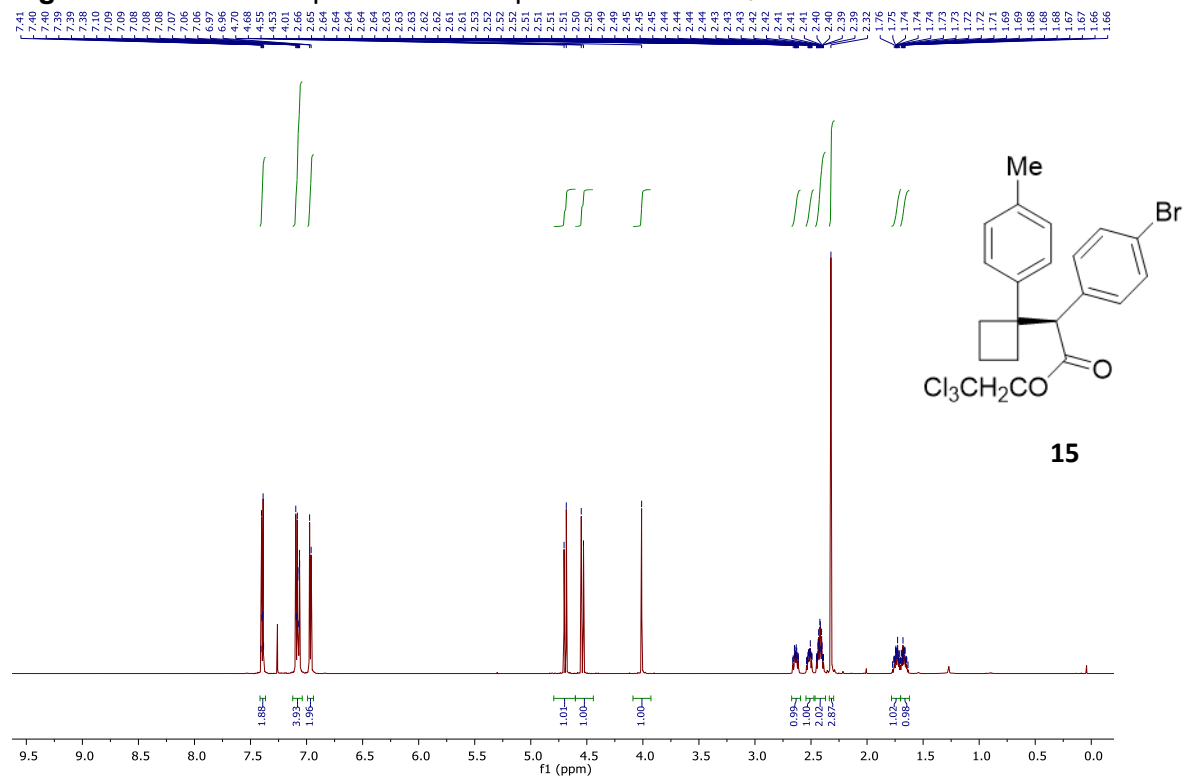

Figure S47.  $^{13}\text{C}$  NMR Spectrum of compound **15** in  $\text{CDCl}_3$ .

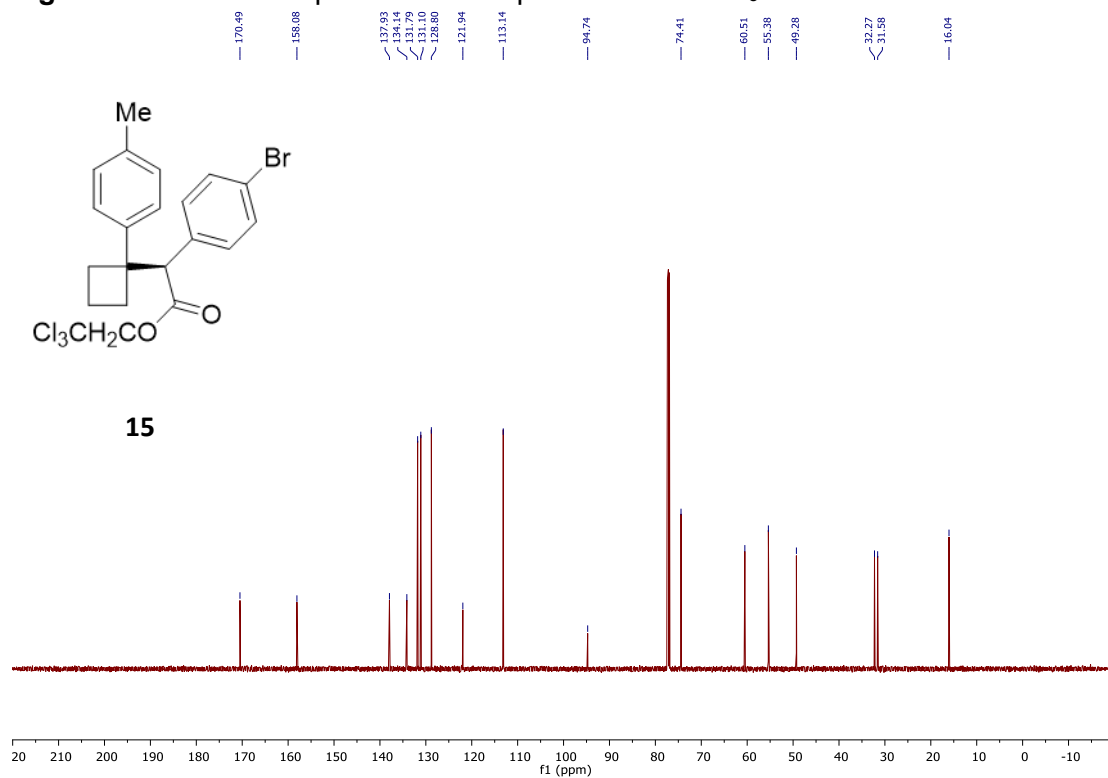

Figure S48.  $^1\text{H}$  NMR Spectrum of compound **16** in  $\text{CDCl}_3$ .

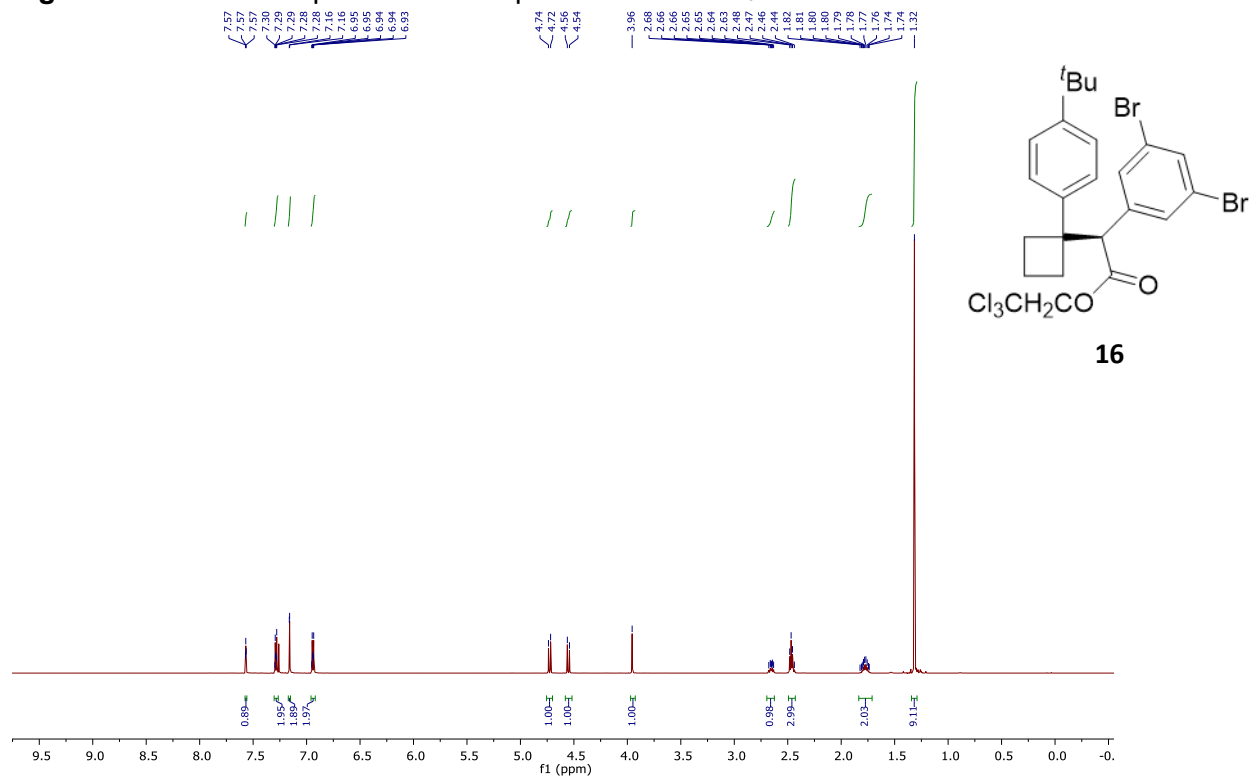

**Figure S49.**  $^{13}\text{C}$  NMR spectrum of compound **16** in  $\text{CDCl}_3$ .

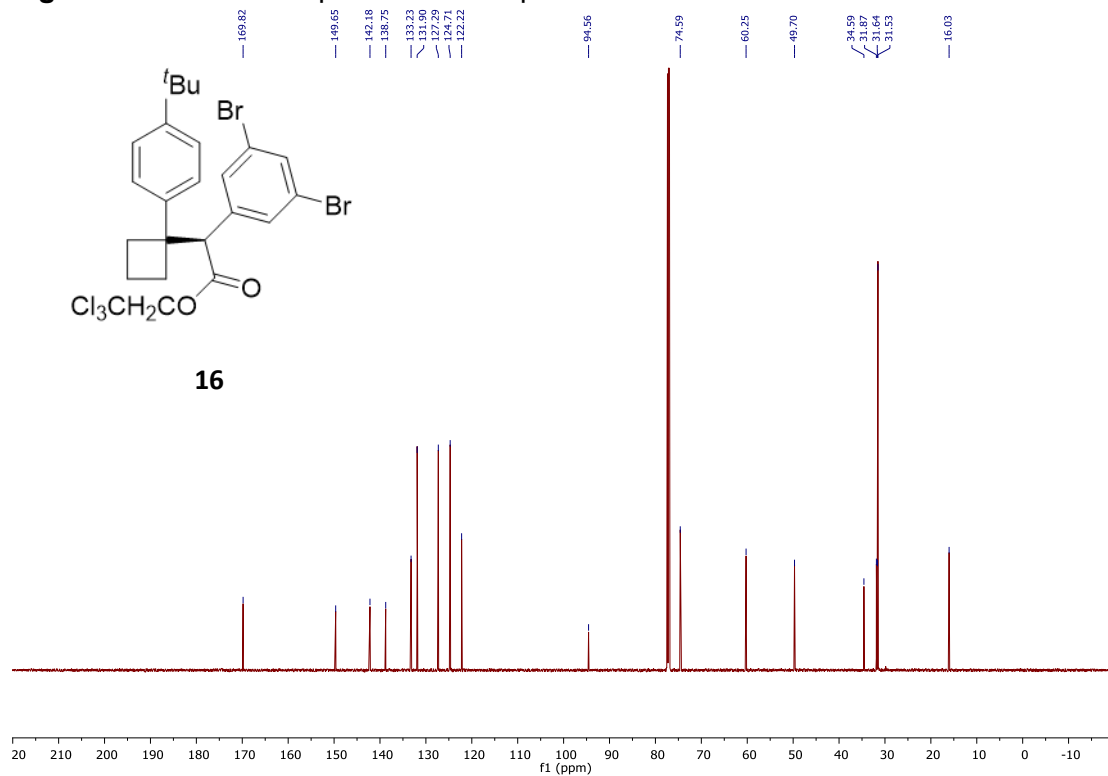

**Figure S50.**  $^1\text{H}$  NMR Spectrum of compound **17** in  $\text{CDCl}_3$ .

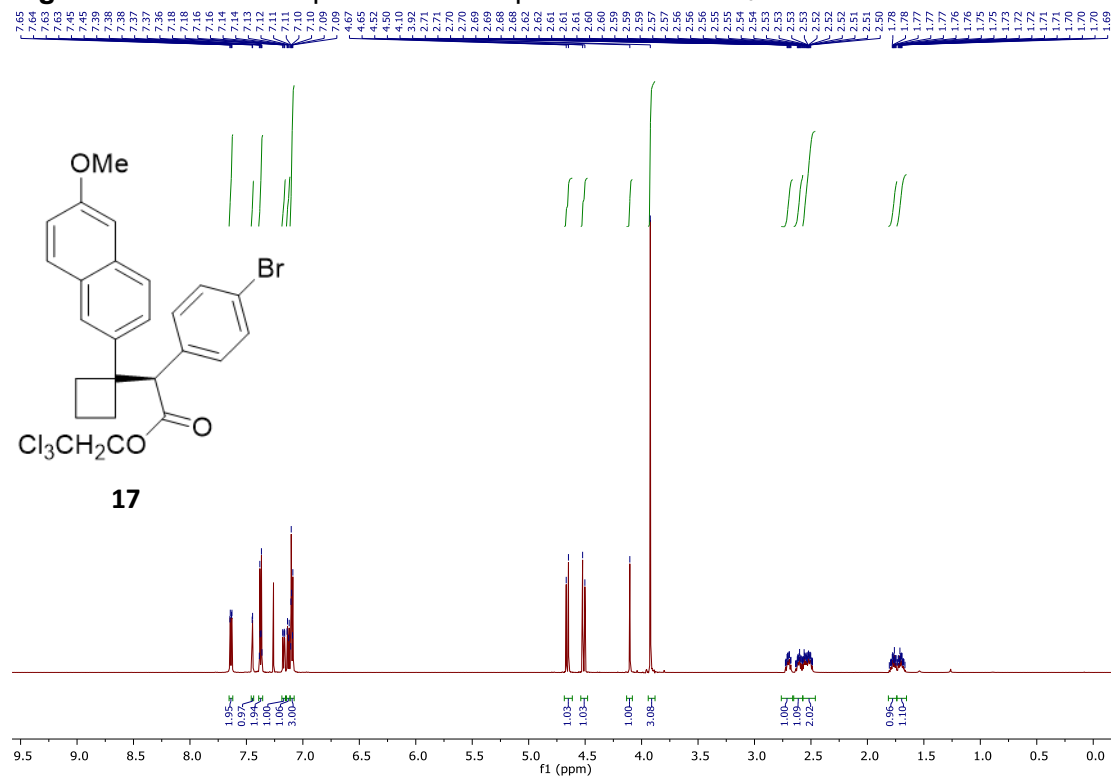

**Figure S51.**  $^{13}\text{C}$  NMR spectrum of compound **17** in  $\text{CDCl}_3$ .

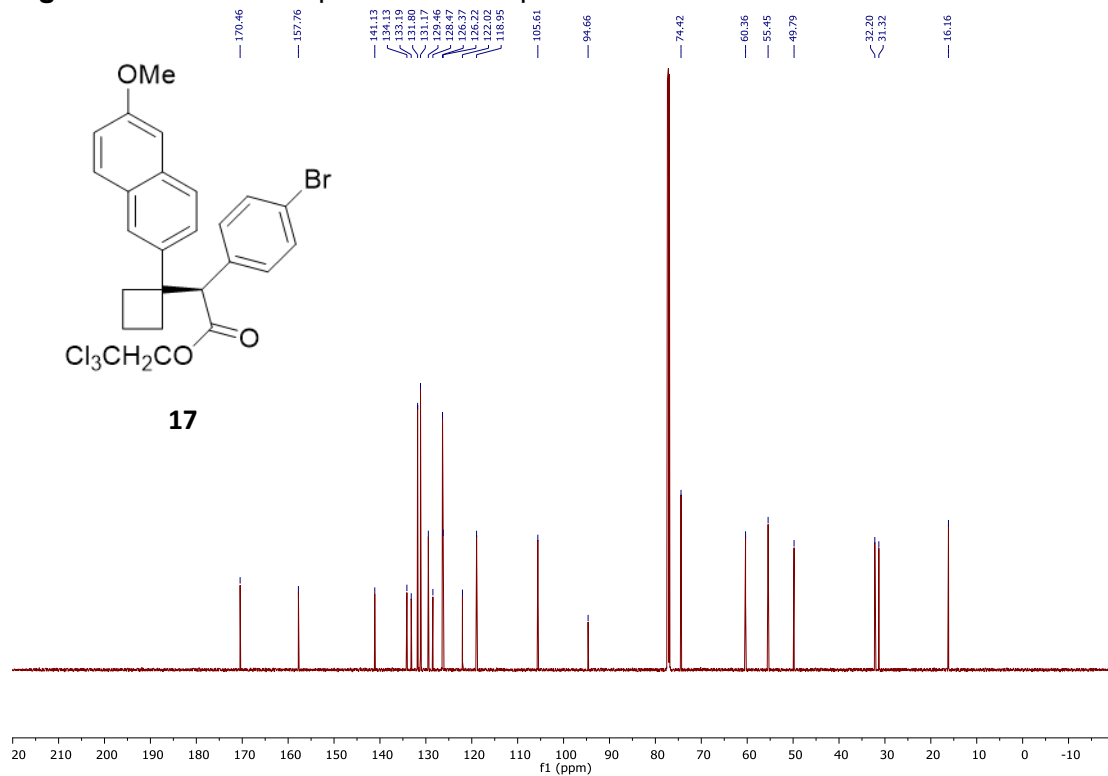

**Figure S52.**  $^1\text{H}$  NMR Spectrum of compound **18** in  $\text{CDCl}_3$ .

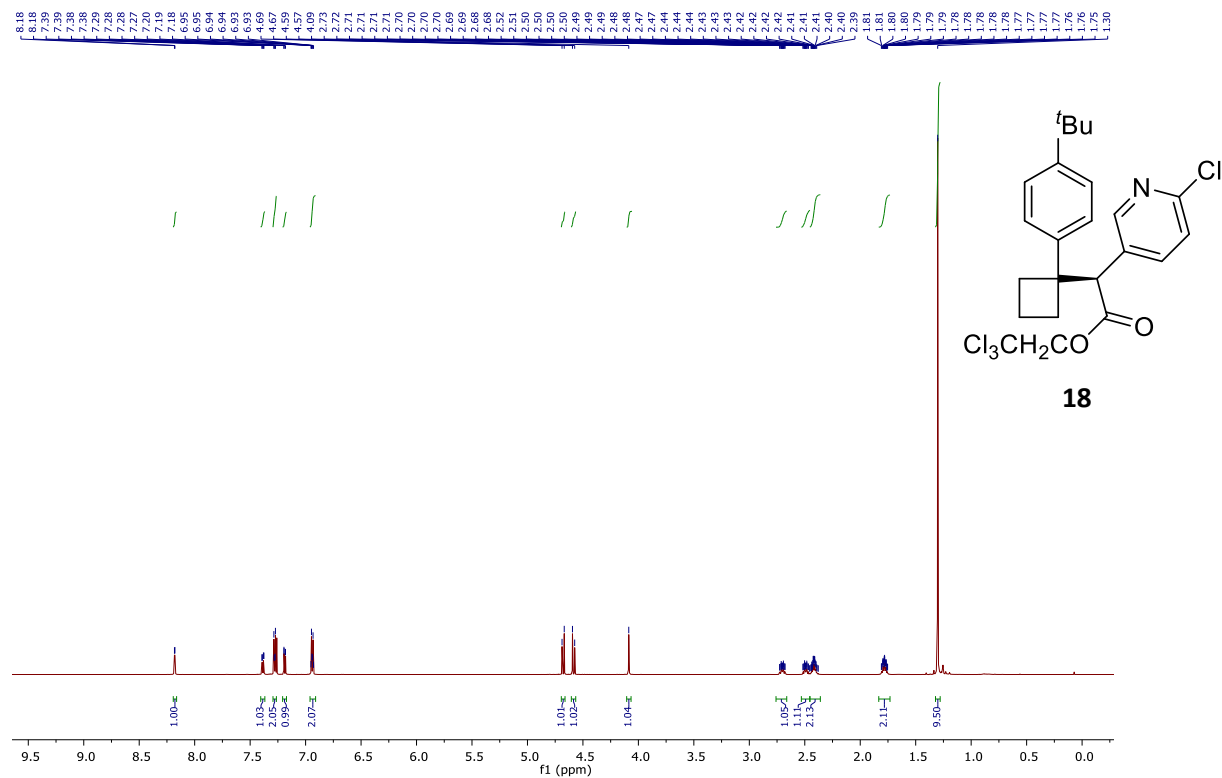

**Figure S53.**  $^{13}\text{C}$  NMR spectrum of compound **18** in  $\text{CDCl}_3$ .

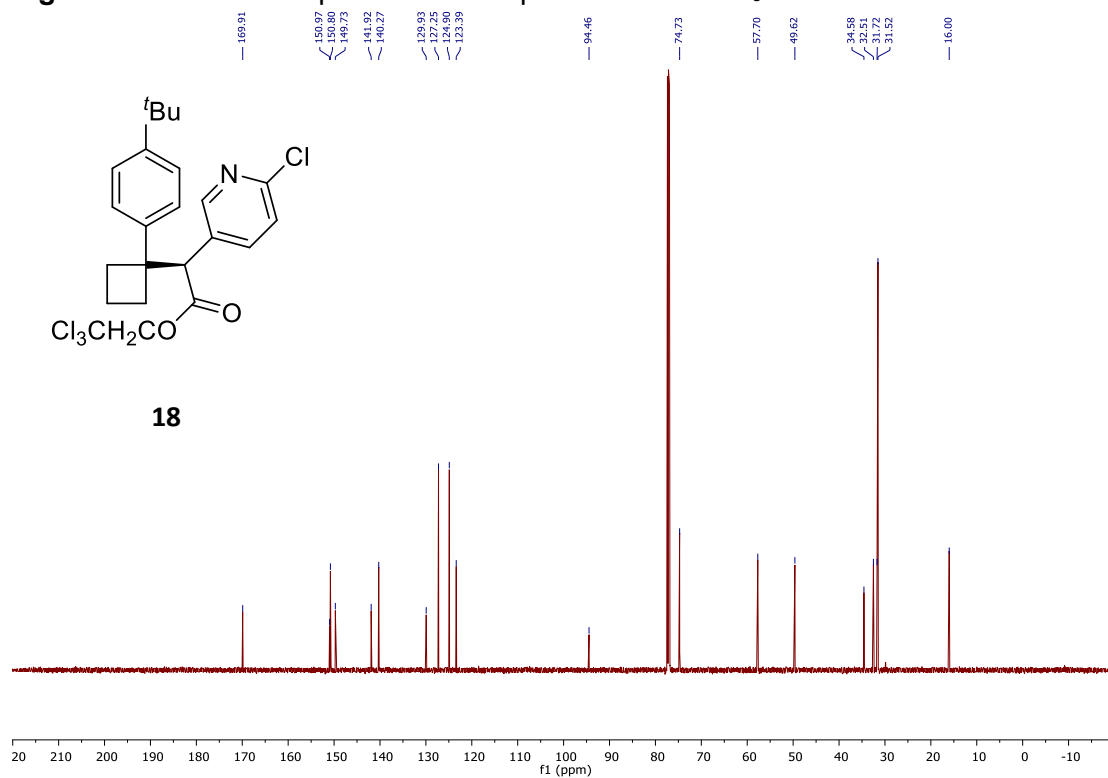

**Figure S54.**  $^1\text{H}$  NMR Spectrum of compound **19** in  $\text{CDCl}_3$ .

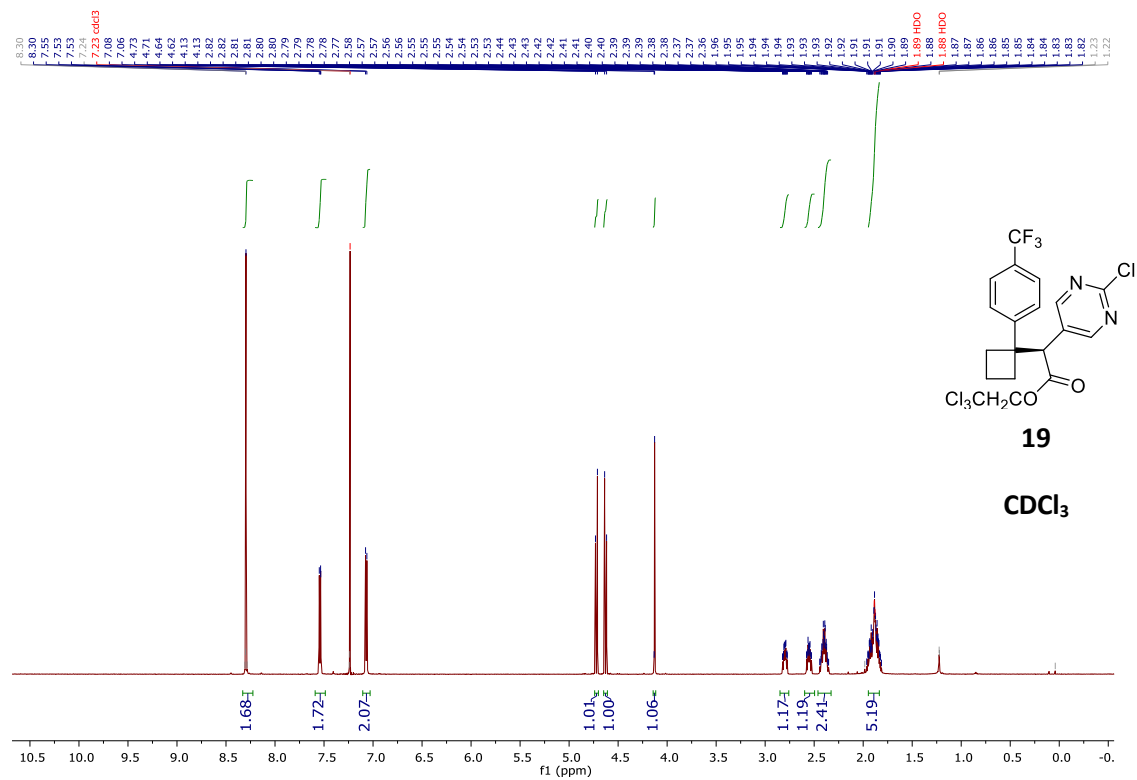

Figure S55.  $^{13}\text{C}$  NMR spectrum of compound **19** in  $\text{CDCl}_3$ .

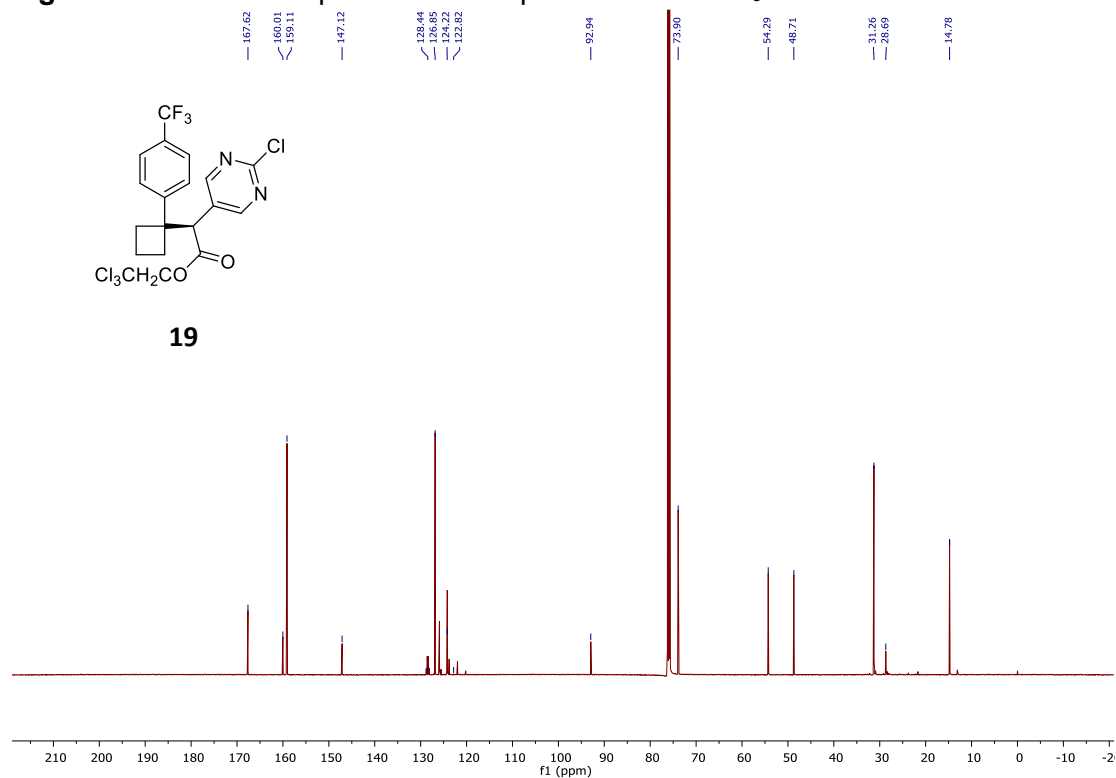

Figure S56.  $^{19}\text{F}$  NMR spectrum of compound **1** in  $\text{CDCl}_3$ .

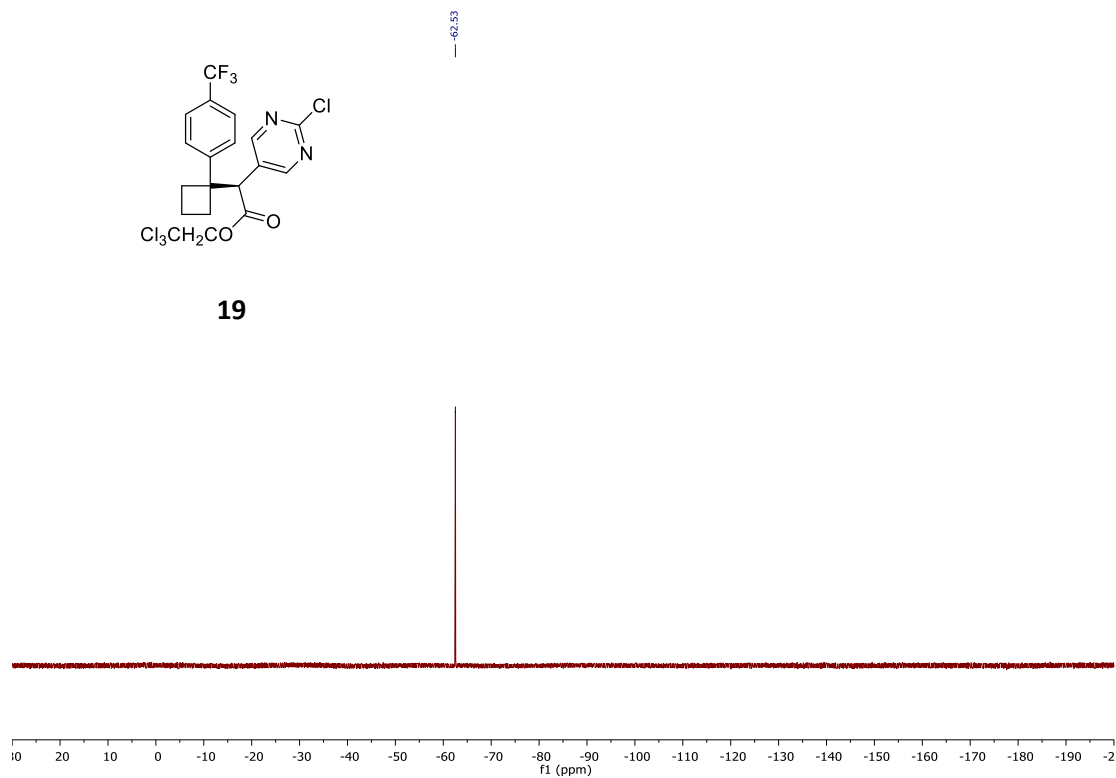

**Figure S57.**  $^1\text{H}$  NMR Spectrum of compound **20** in  $\text{CDCl}_3$ .

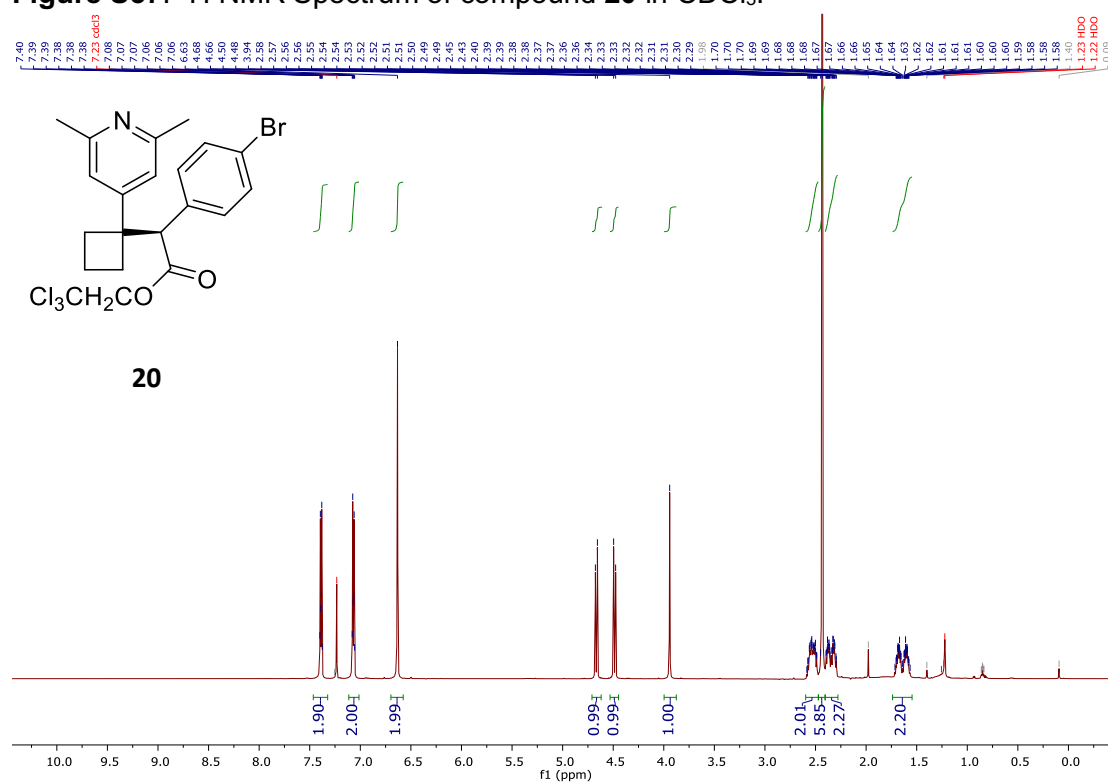

**Figure S58.**  $^{13}\text{C}$  NMR spectrum of compound **20** in  $\text{CDCl}_3$ .

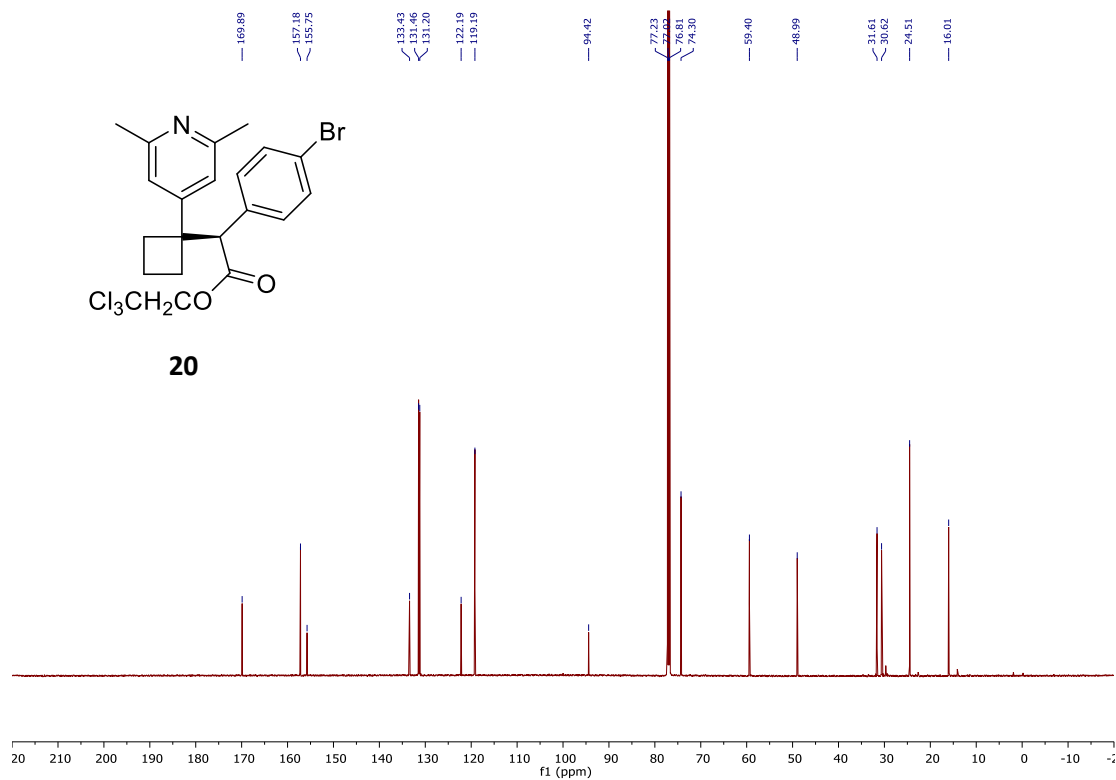

**Figure S59.**  $^1\text{H}$  NMR Spectrum of compound **21** in  $\text{CDCl}_3$ .

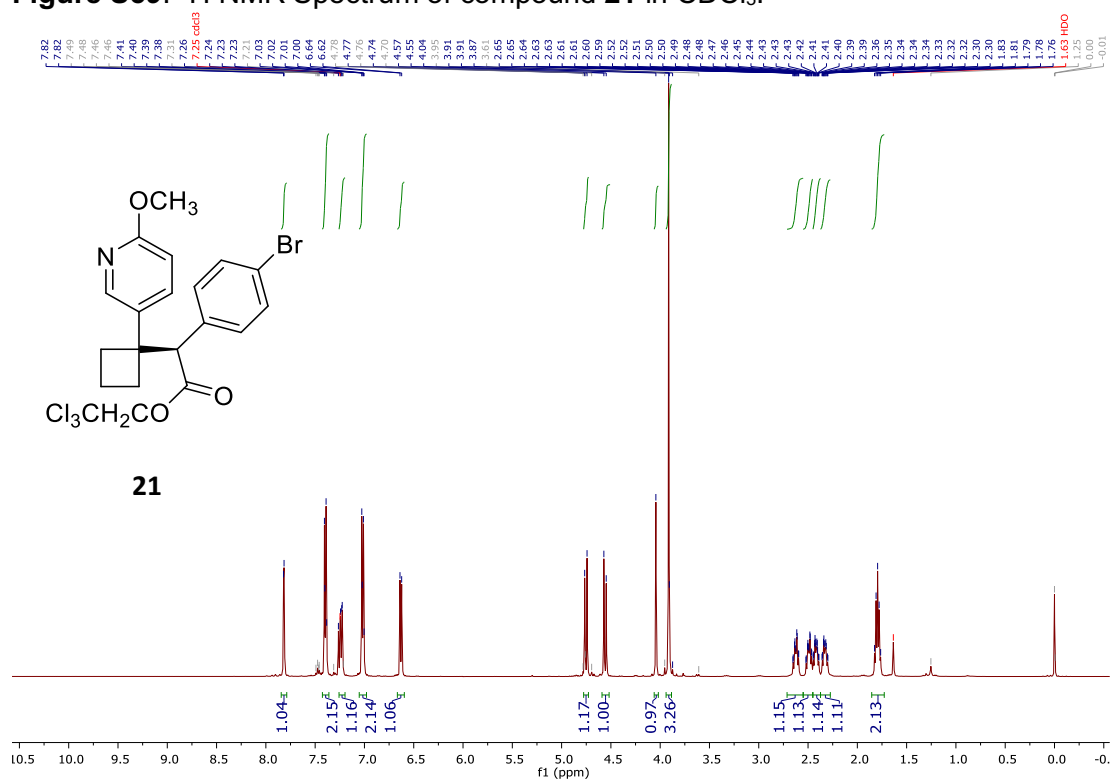

**Figure S60.**  $^{13}\text{C}$  NMR spectrum of compound **21** in  $\text{CDCl}_3$ .

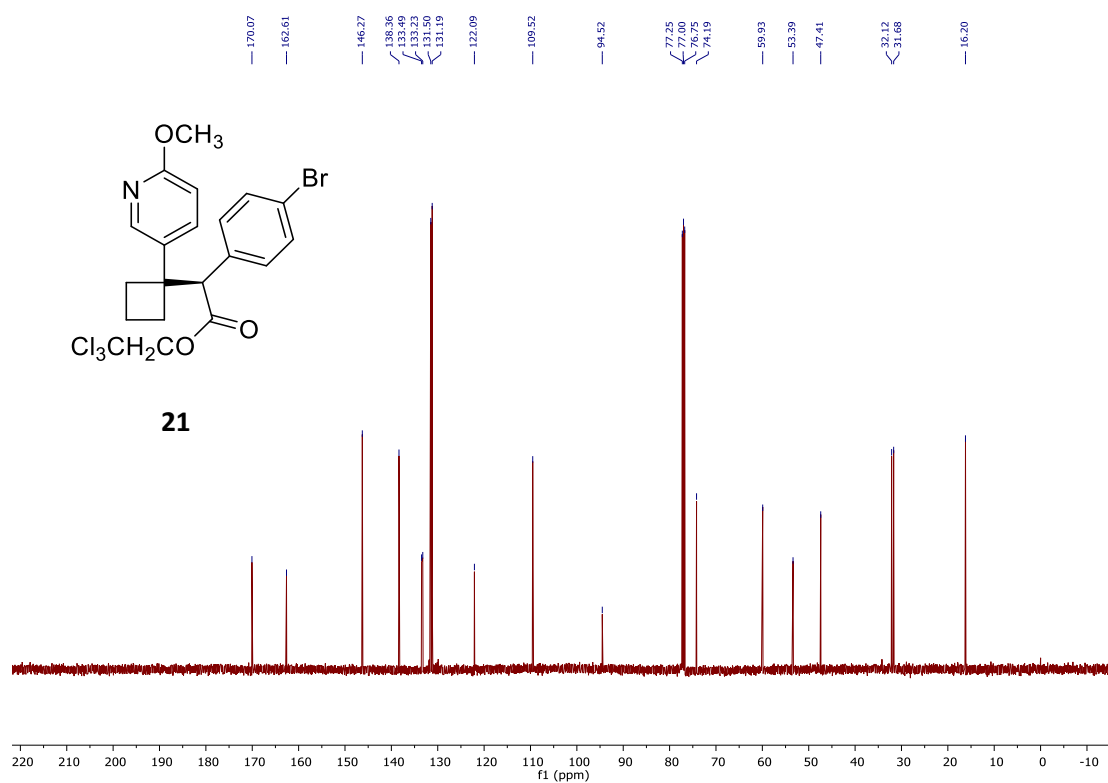

**Figure S61.**  $^1\text{H}$  NMR Spectrum of compound **9** in  $\text{CDCl}_3$ .

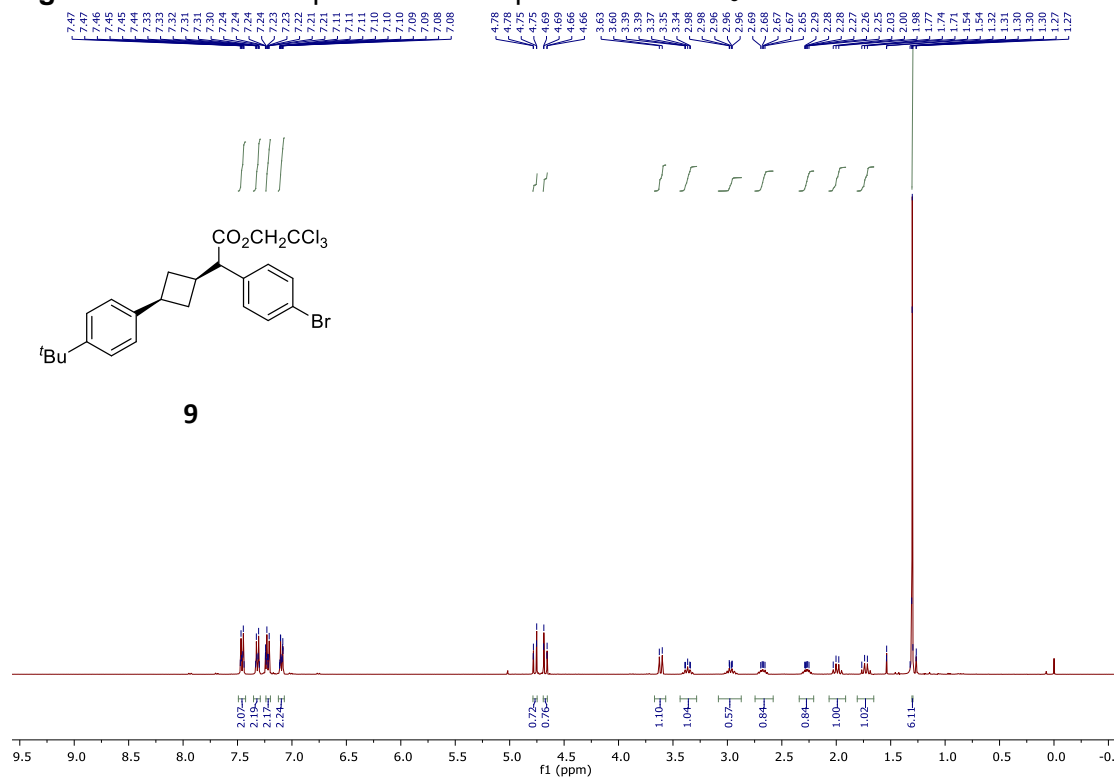

**Figure S62.**  $^{13}\text{C}$  NMR spectrum of compound **9** in  $\text{CDCl}_3$ .

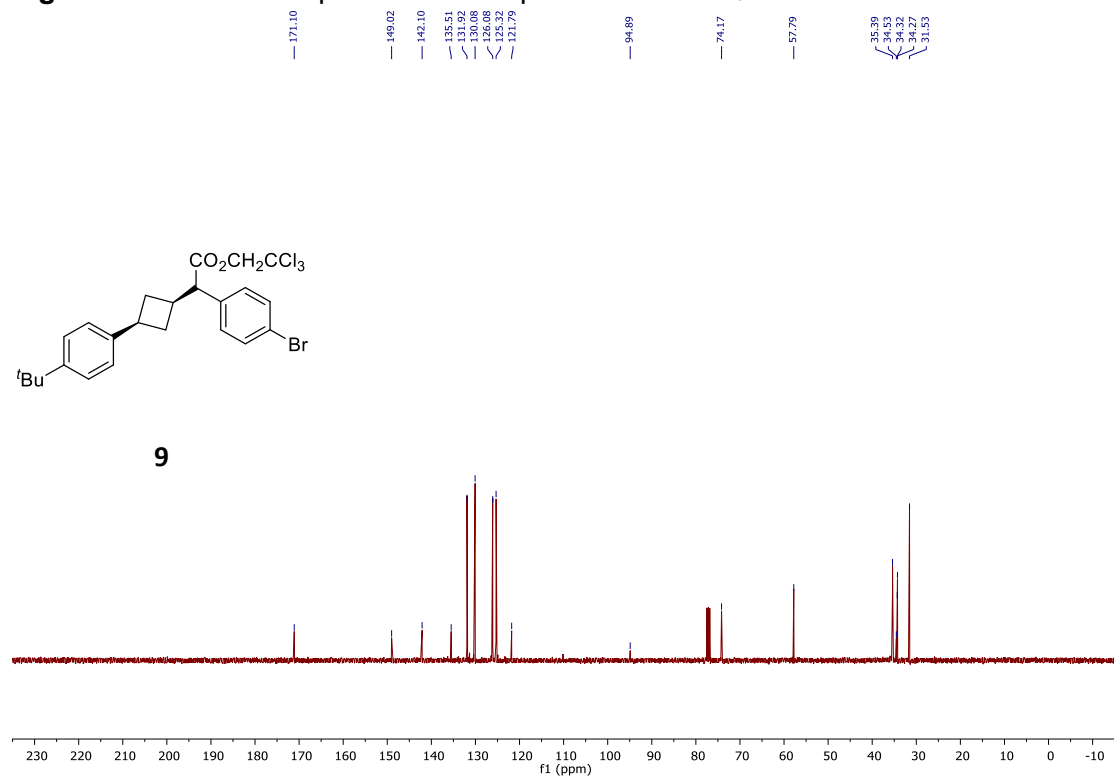

**Figure S63.**  $^1\text{H}$  NMR Spectrum of compound **22** in  $\text{CDCl}_3$ .

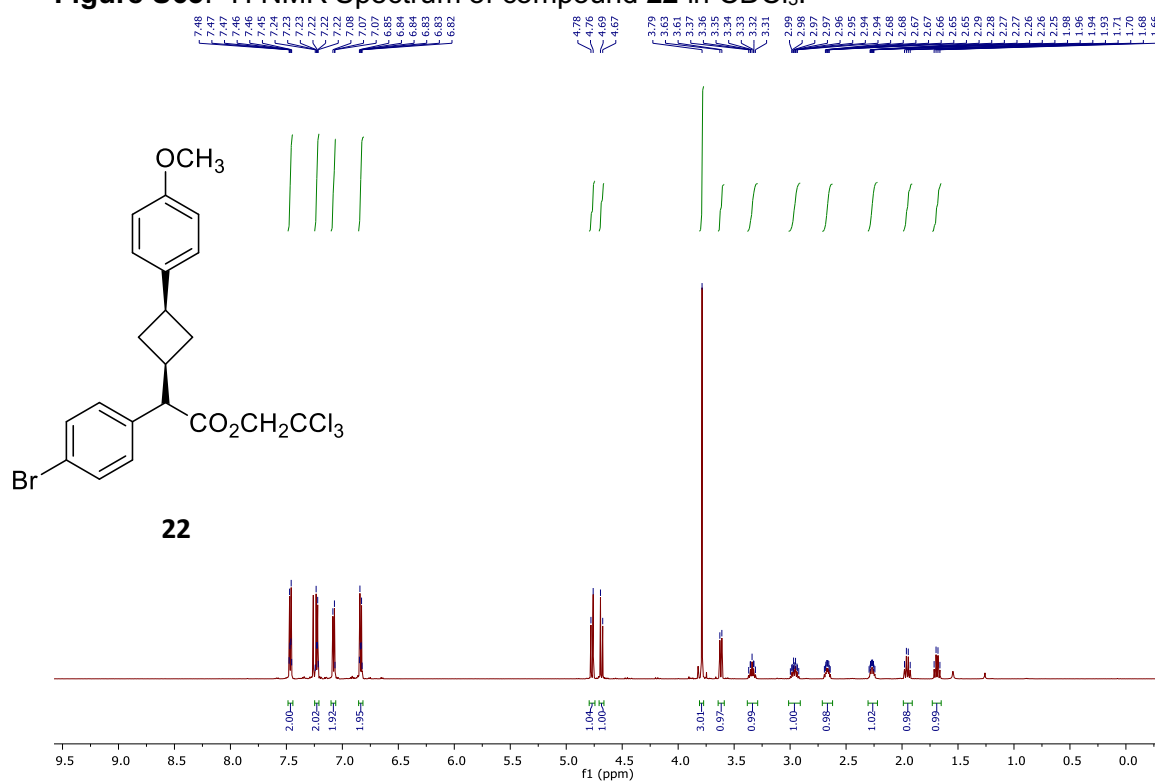

**Figure S64.**  $^{13}\text{C}$  NMR spectrum of compound **22** in  $\text{CDCl}_3$ .

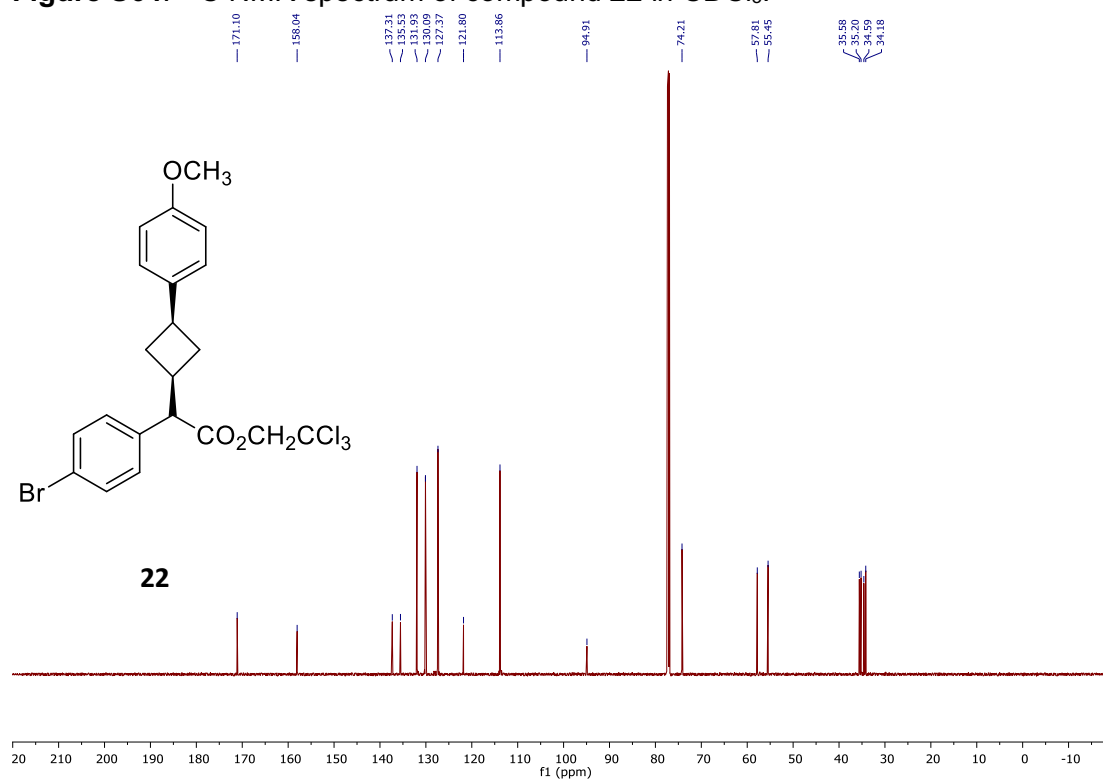

**Figure S65.**  $^1\text{H}$  NMR Spectrum of compound **23** in  $\text{CDCl}_3$ .

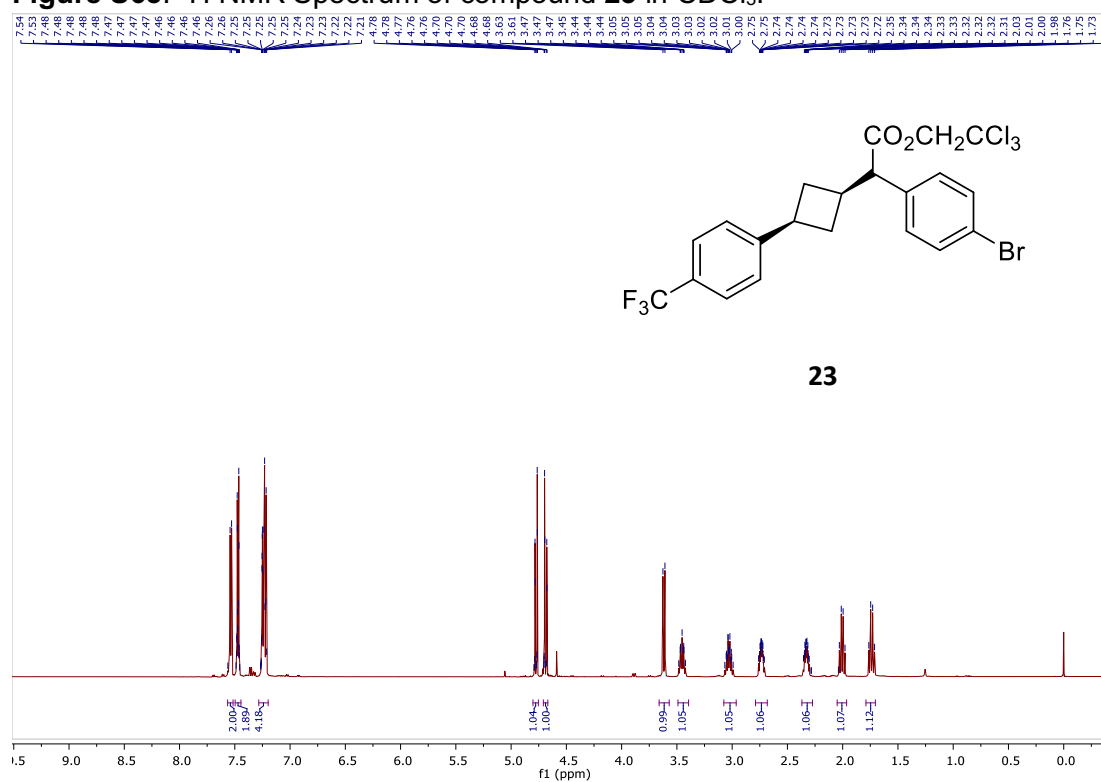

**Figure S66.**  $^{13}\text{C}$  NMR spectrum of compound **23** in  $\text{CDCl}_3$ .

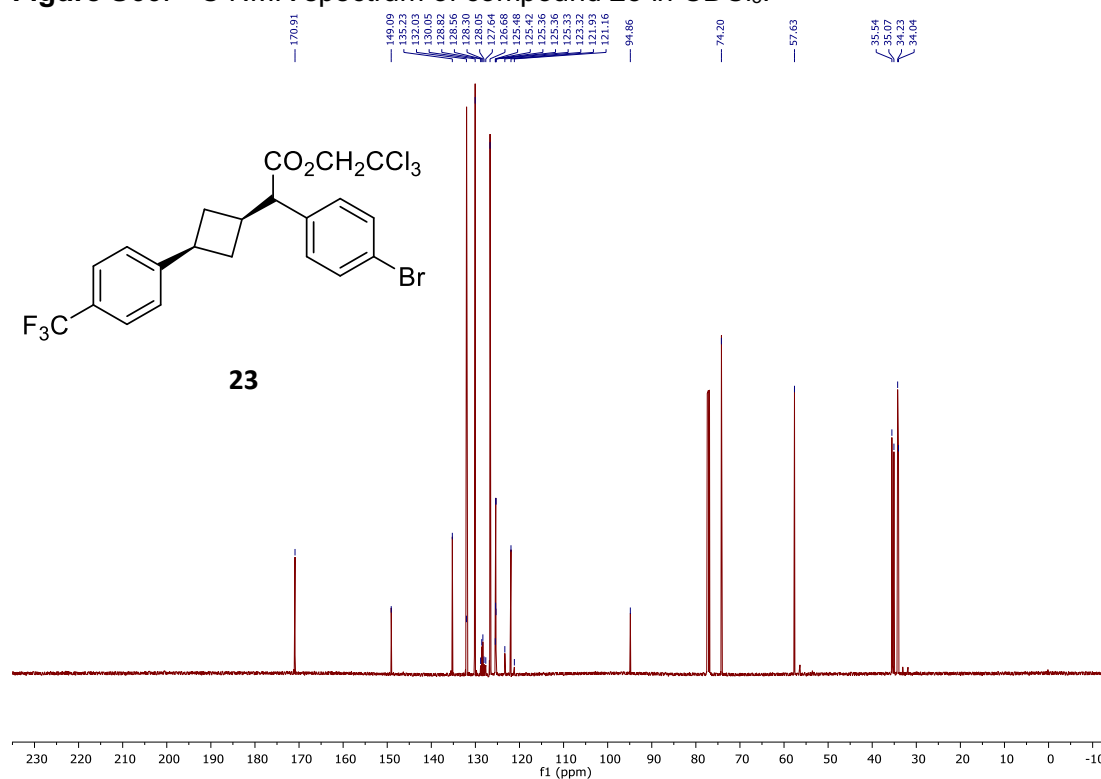

**Figure S67.**  $^{19}\text{F}$  NMR spectrum of compound **23** in  $\text{CDCl}_3$ .

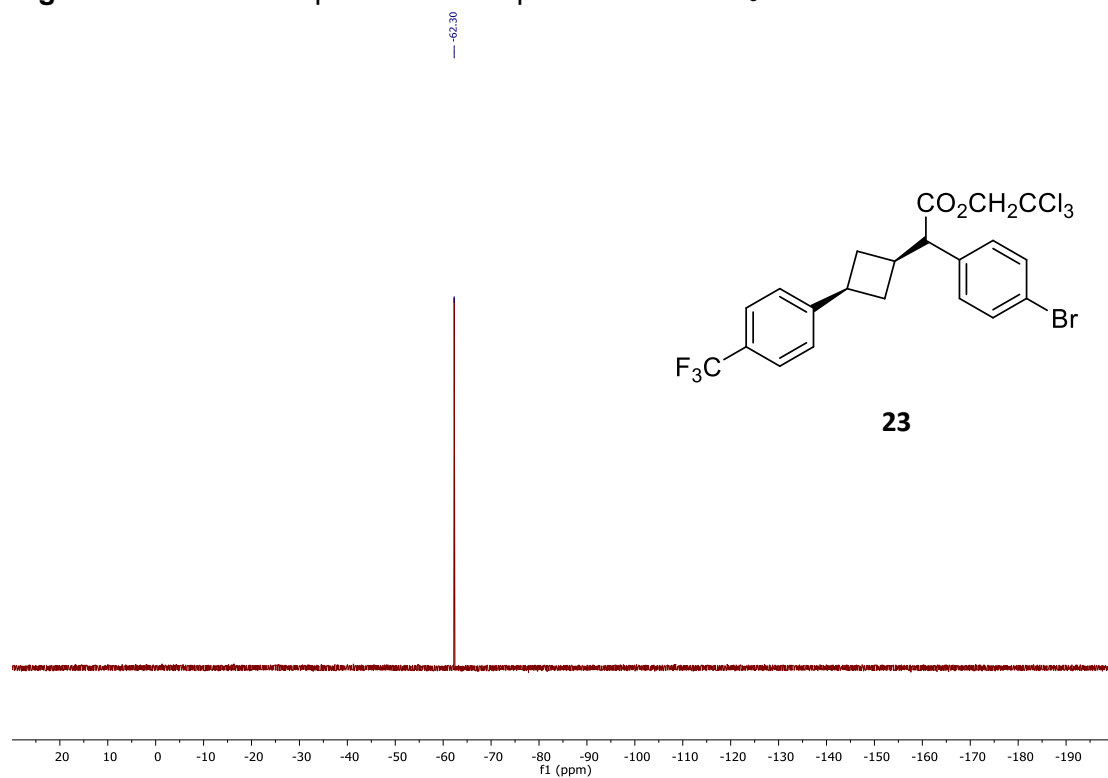

**Figure S68.**  $^1\text{H}$  NMR Spectrum of compound **24** in  $\text{CDCl}_3$ .

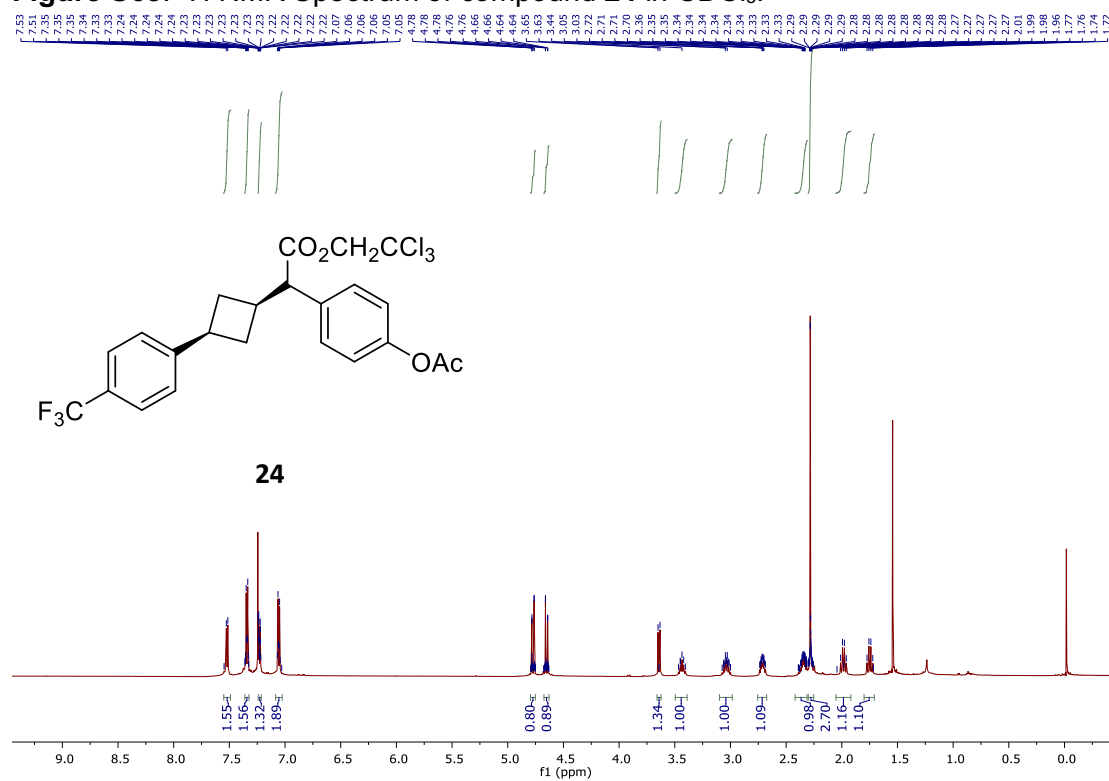

**Figure S69.**  $^{13}\text{C}$  NMR spectrum of compound **24** in  $\text{CDCl}_3$ .

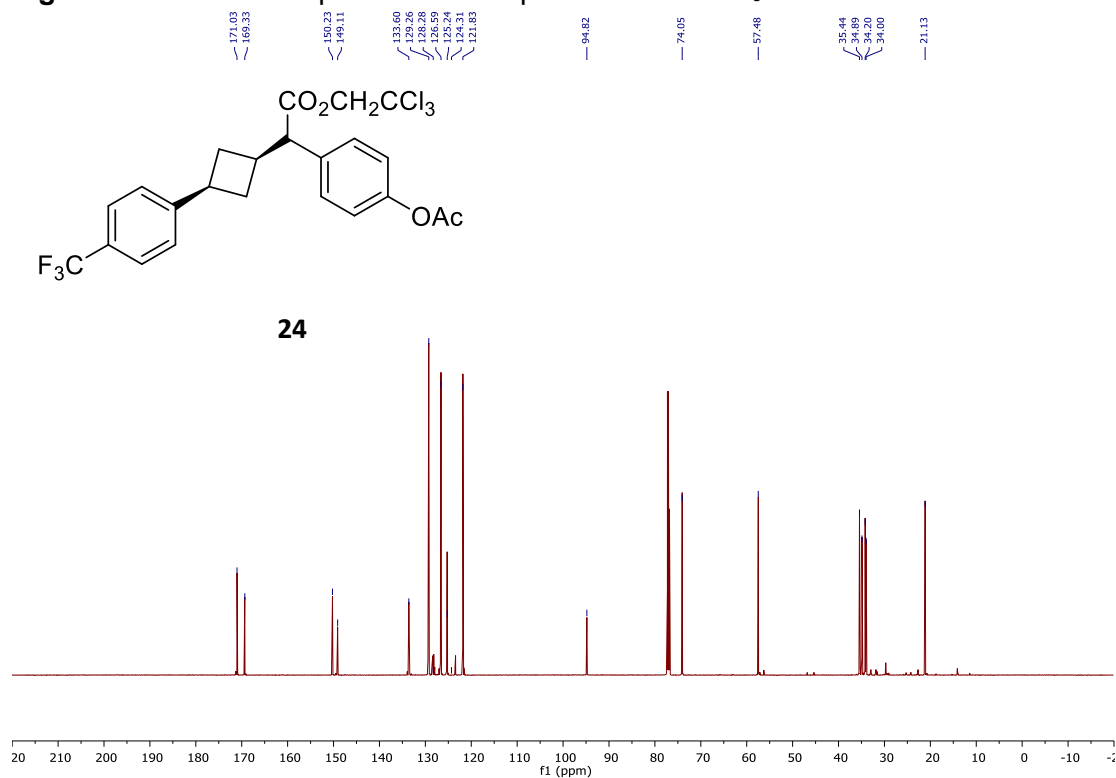

**Figure S70.**  $^{19}\text{F}$  NMR spectrum of compound **24** in  $\text{CDCl}_3$ .

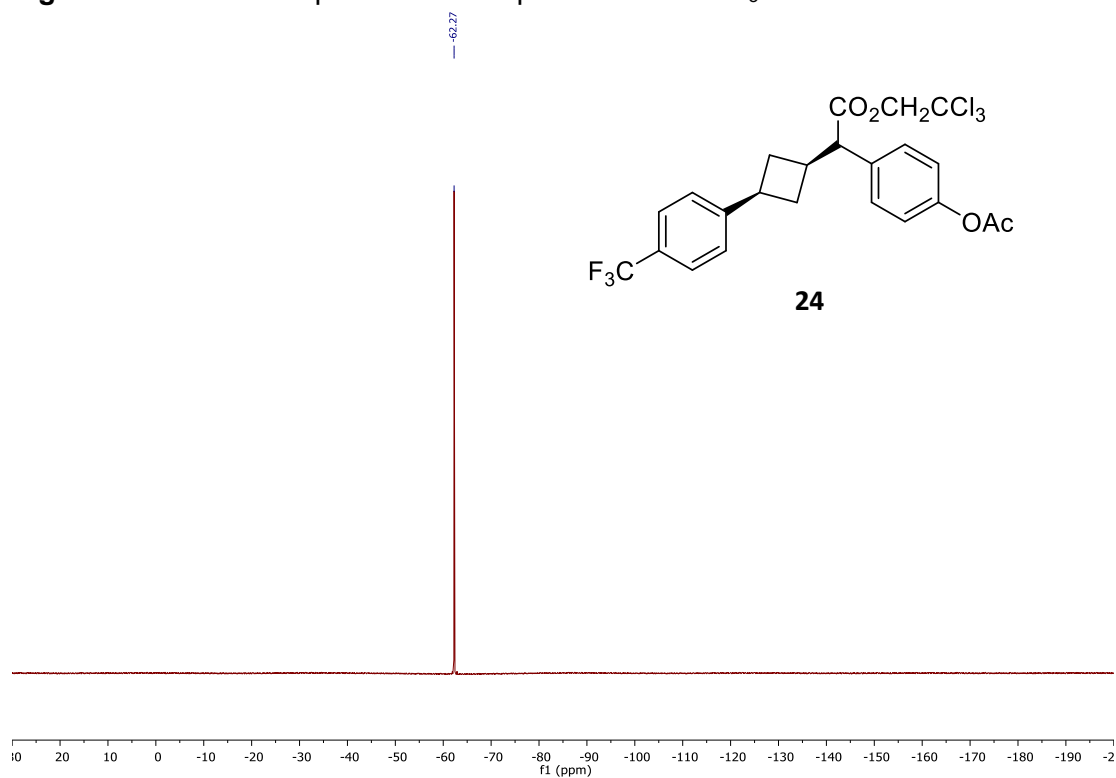

**Figure S71.**  $^1\text{H}$  NMR Spectrum of compound **25** in  $\text{CDCl}_3$ .

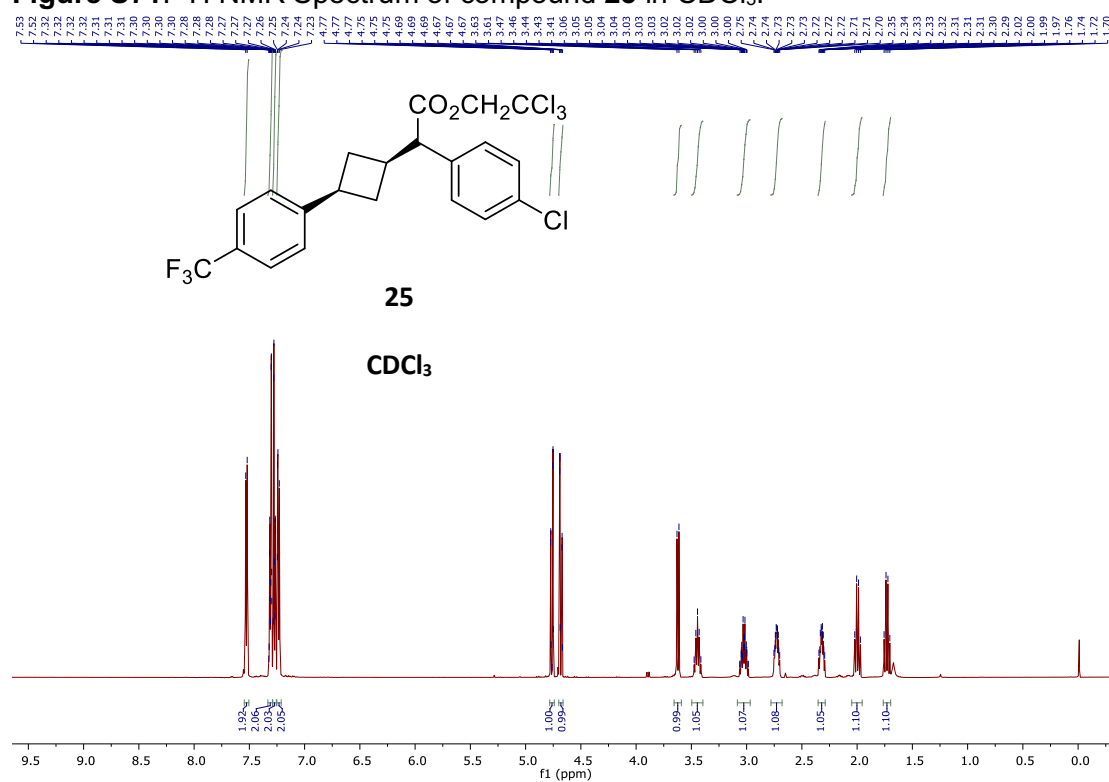

**Figure S72.**  $^{13}\text{C}$  NMR spectrum of compound **25** in  $\text{CDCl}_3$ .

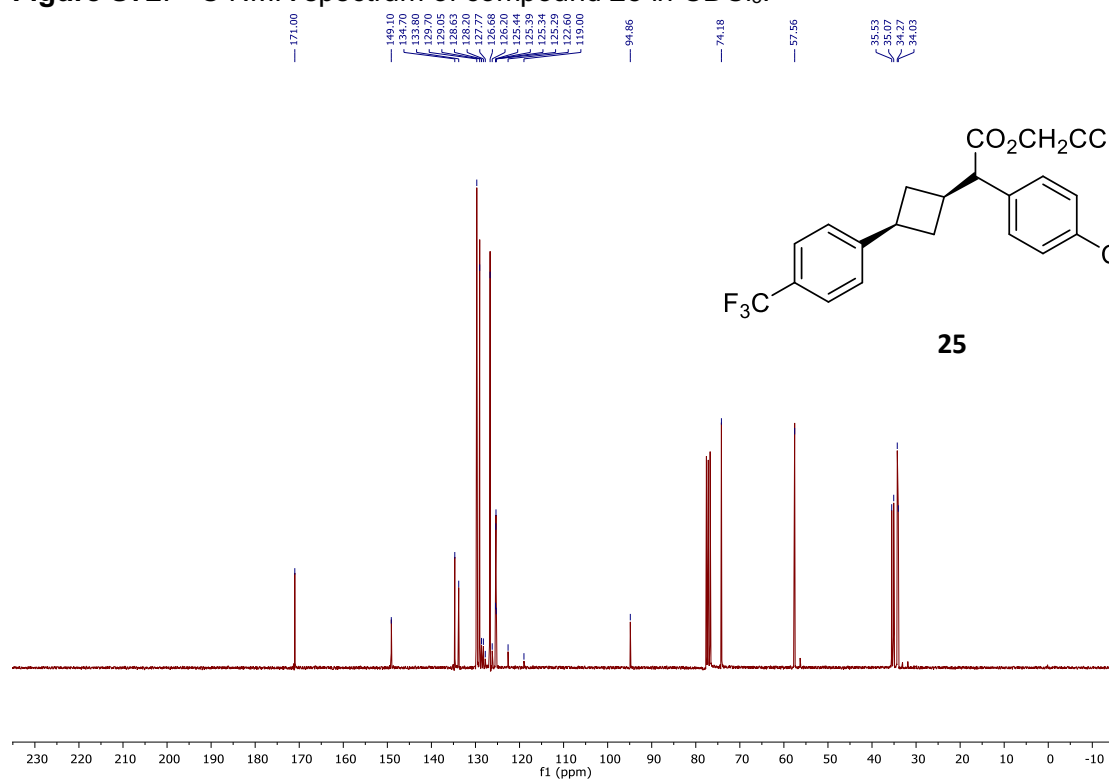

**Figure S73.**  $^{19}\text{F}$  NMR spectrum of compound **25** in  $\text{CDCl}_3$ .

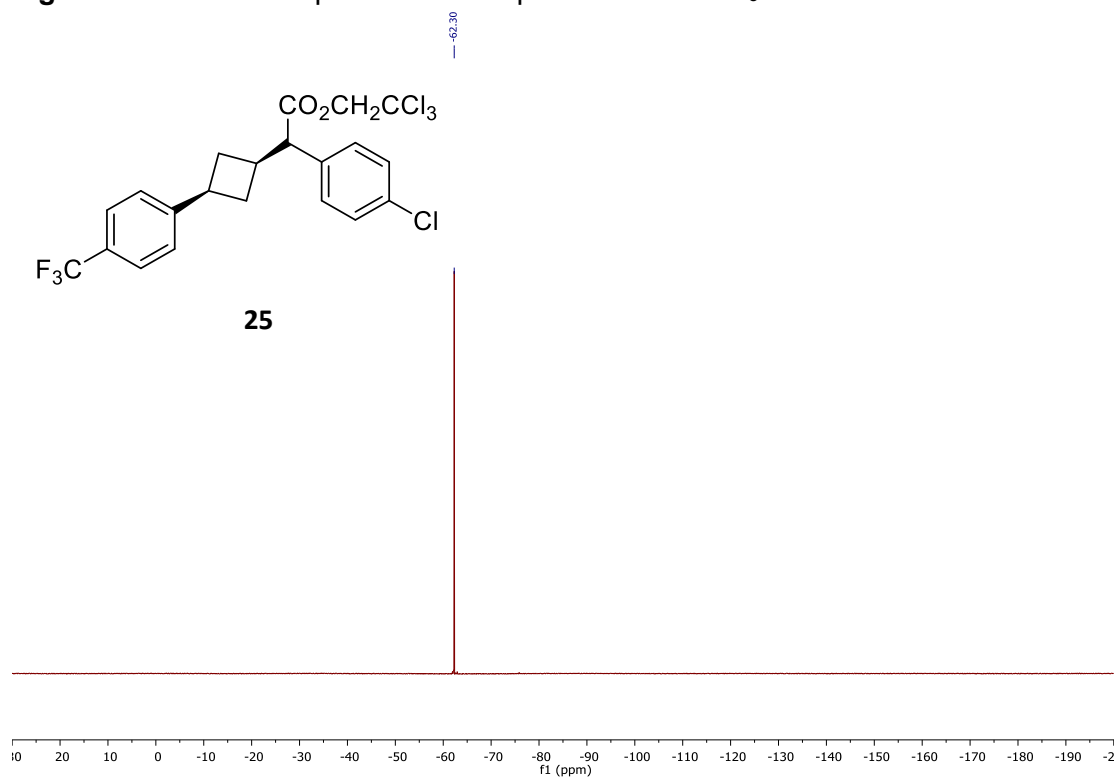

**Figure S74.**  $^1\text{H}$  NMR Spectrum of compound **26** in  $\text{CDCl}_3$ .

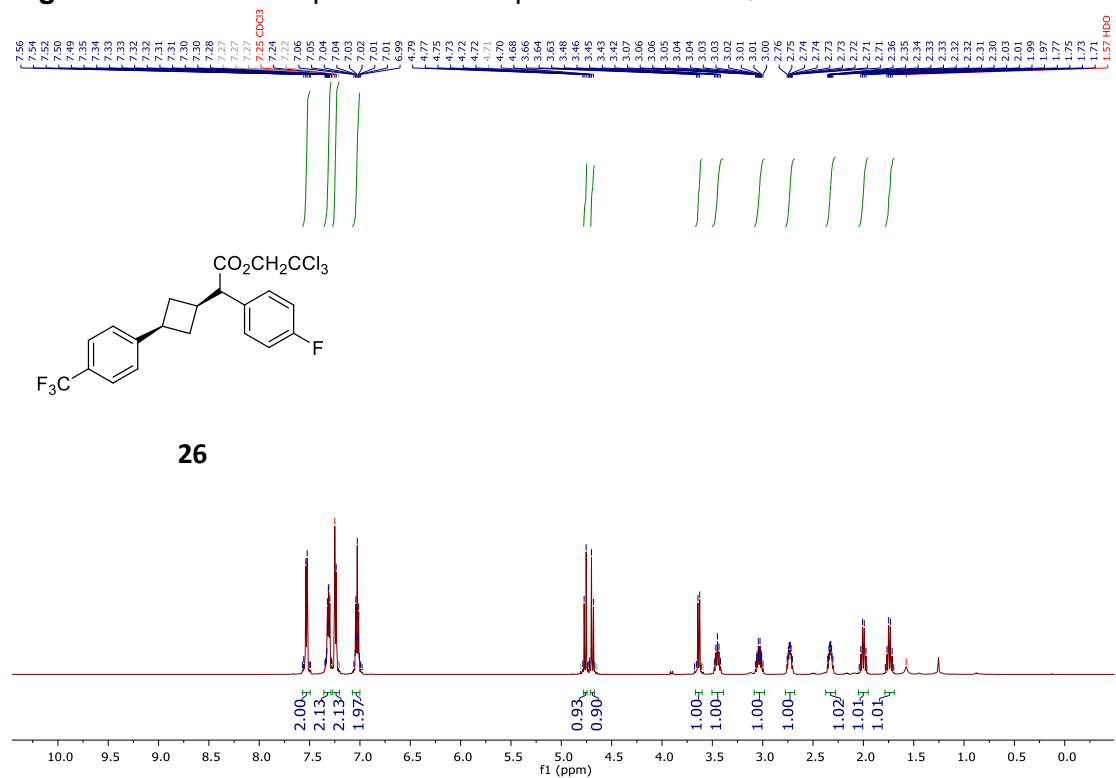

**Figure S75.**  $^{13}\text{C}$  NMR spectrum of compound **26** in  $\text{CDCl}_3$ .

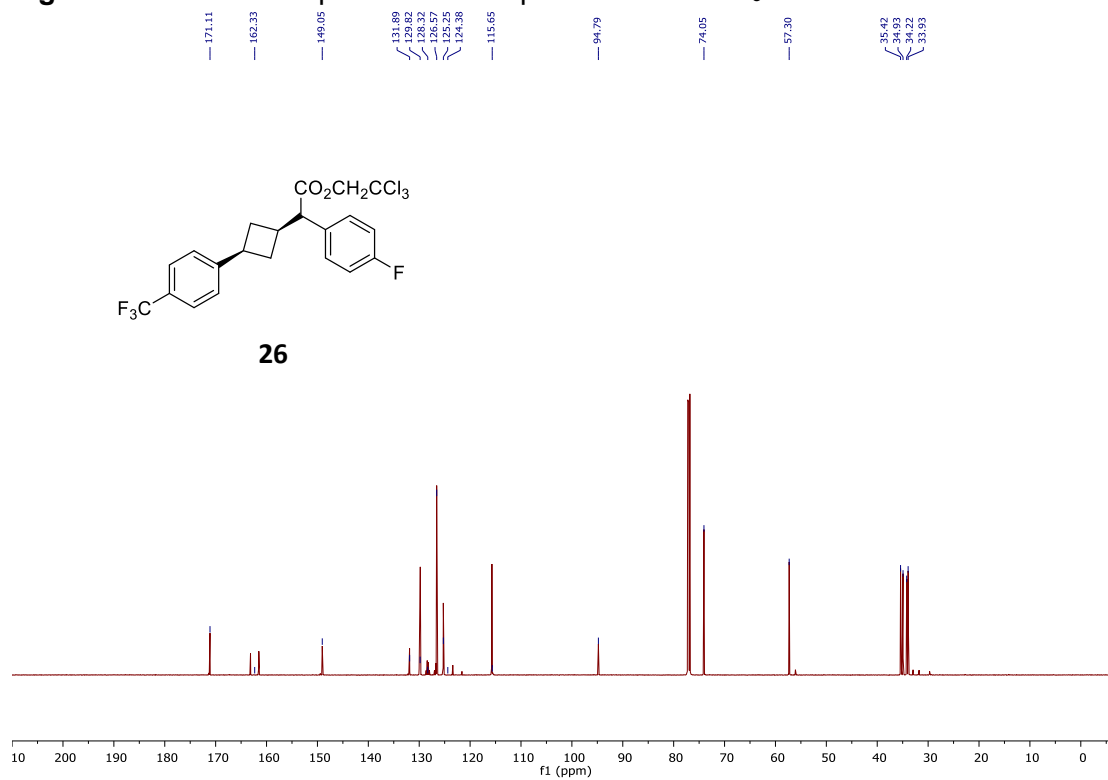

**Figure S76.**  $^{19}\text{F}$  NMR spectrum of compound **26** in  $\text{CDCl}_3$ .

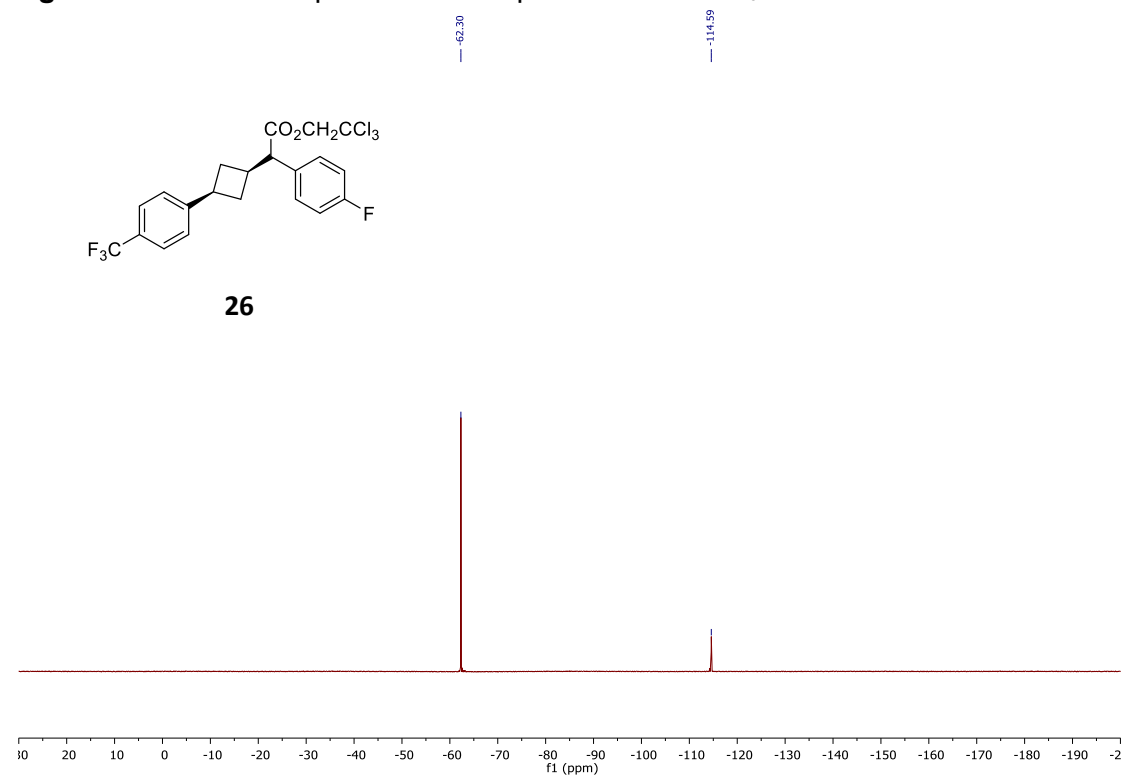

Figure S77.  $^1\text{H}$  NMR Spectrum of compound **27** in  $\text{CDCl}_3$ .

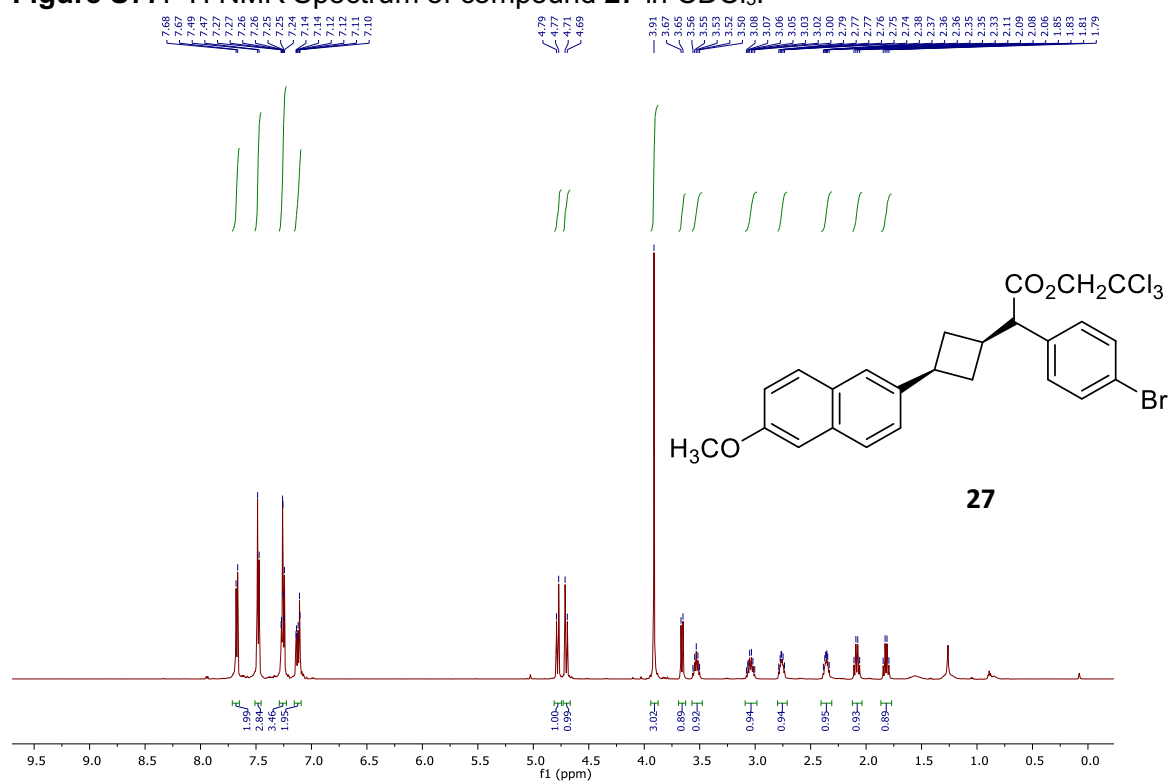

Figure S78.  $^{13}\text{C}$  NMR spectrum of compound **27** in  $\text{CDCl}_3$ .

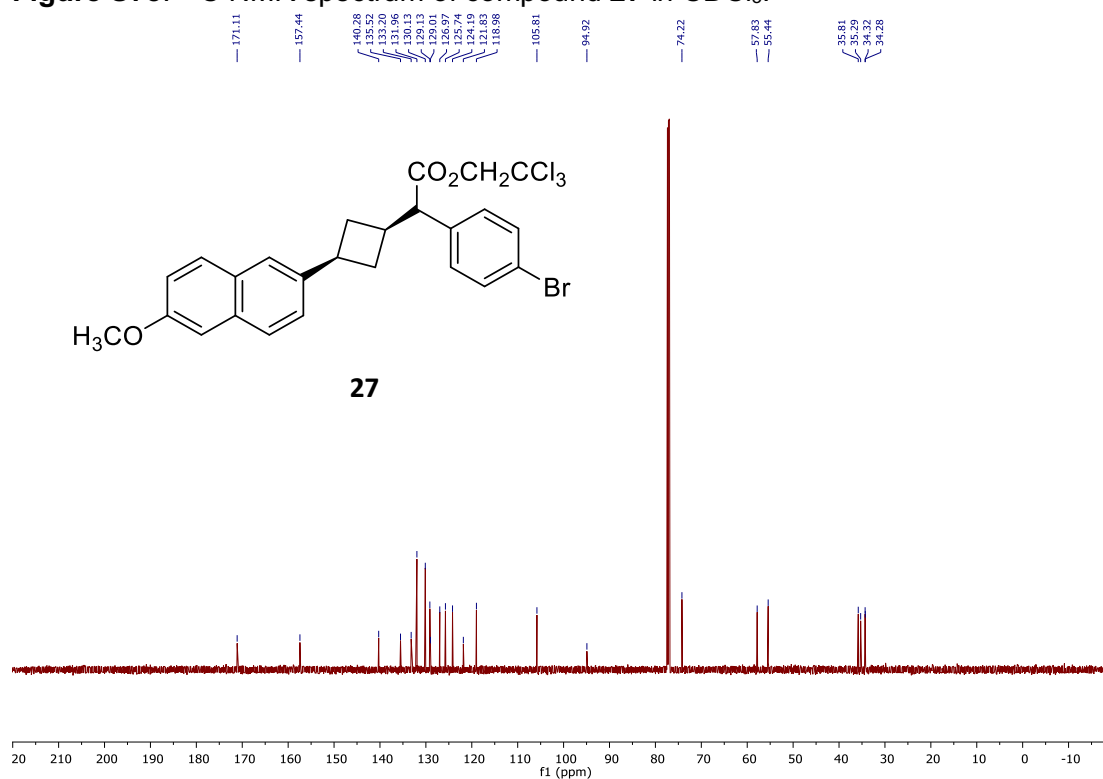

**Figure S79.**  $^1\text{H}$  NMR Spectrum of compound **28** in  $\text{CDCl}_3$ .

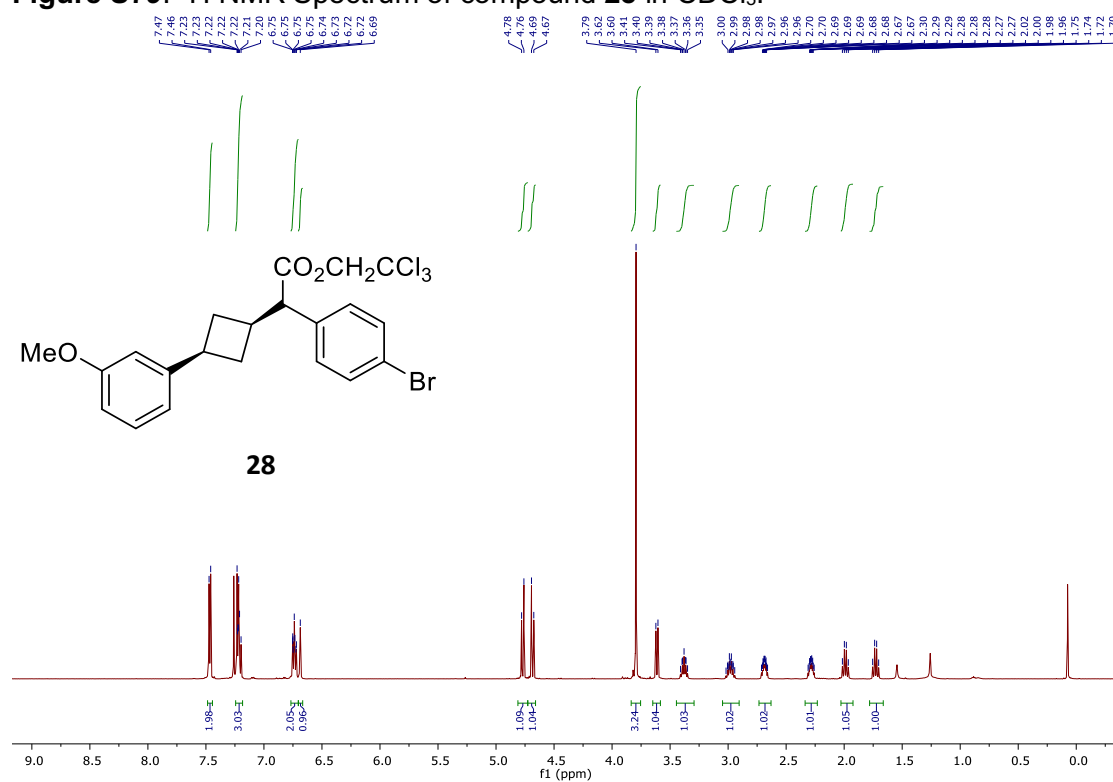

**Figure S80.**  $^{13}\text{C}$  NMR spectrum of compound **28** in  $\text{CDCl}_3$ .

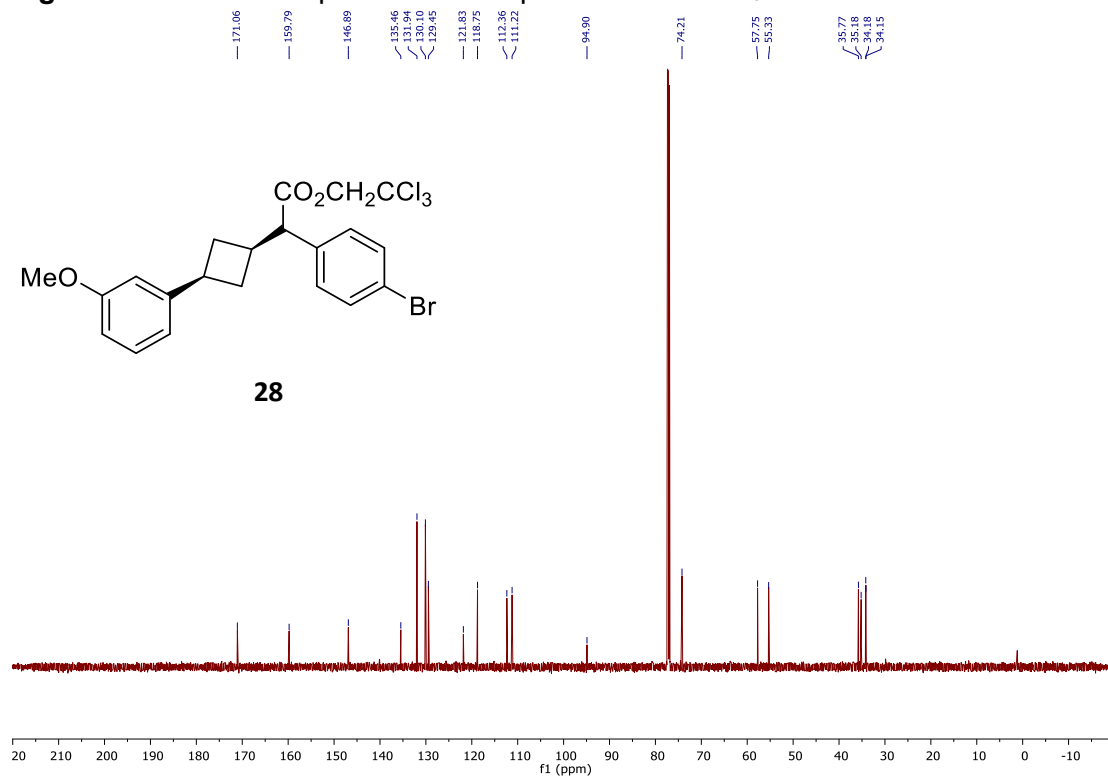

**Figure S81.**  $^1\text{H}$  NMR Spectrum of compound **29** in  $\text{CDCl}_3$ .

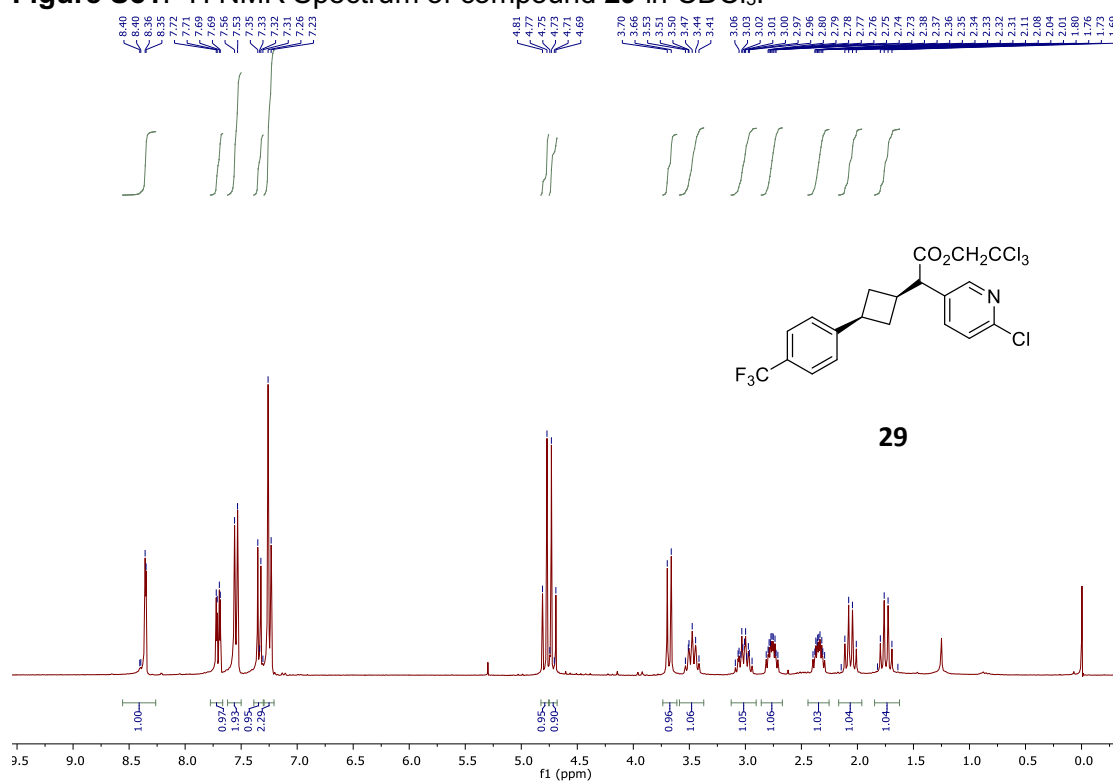

**Figure S82.**  $^{13}\text{C}$  NMR spectrum of compound **29** in  $\text{CDCl}_3$ .

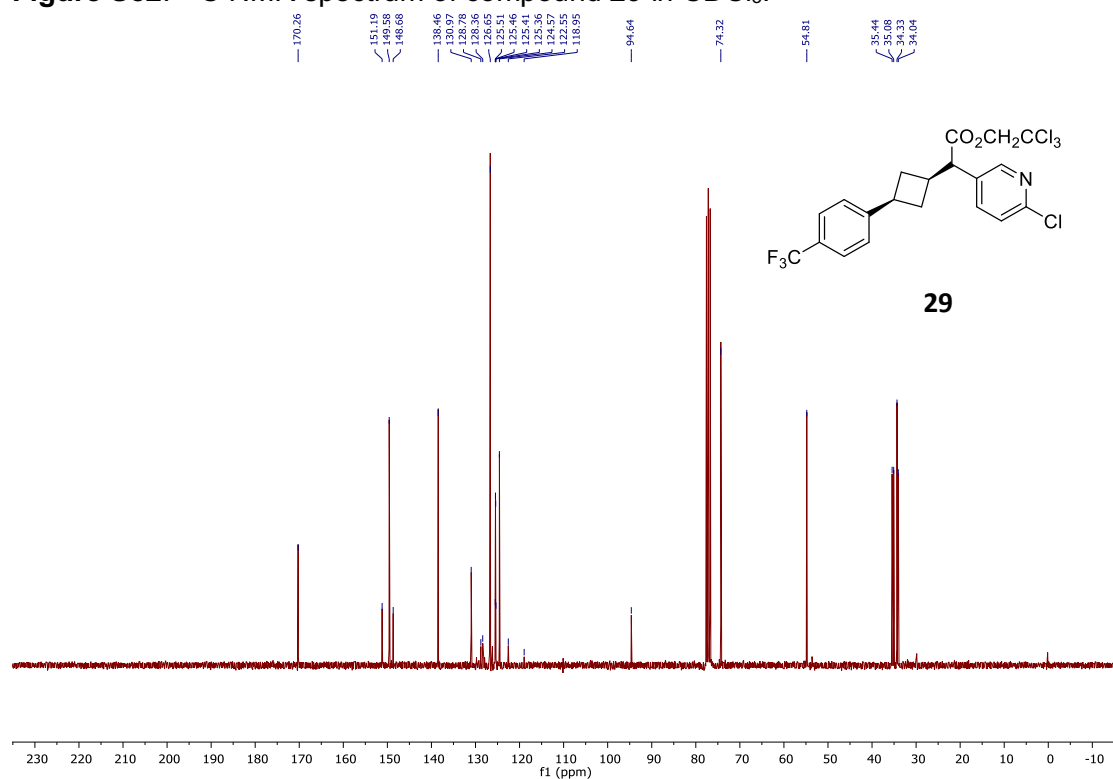

**Figure S83.**  $^{19}\text{F}$  NMR spectrum of compound **29** in  $\text{CDCl}_3$ .

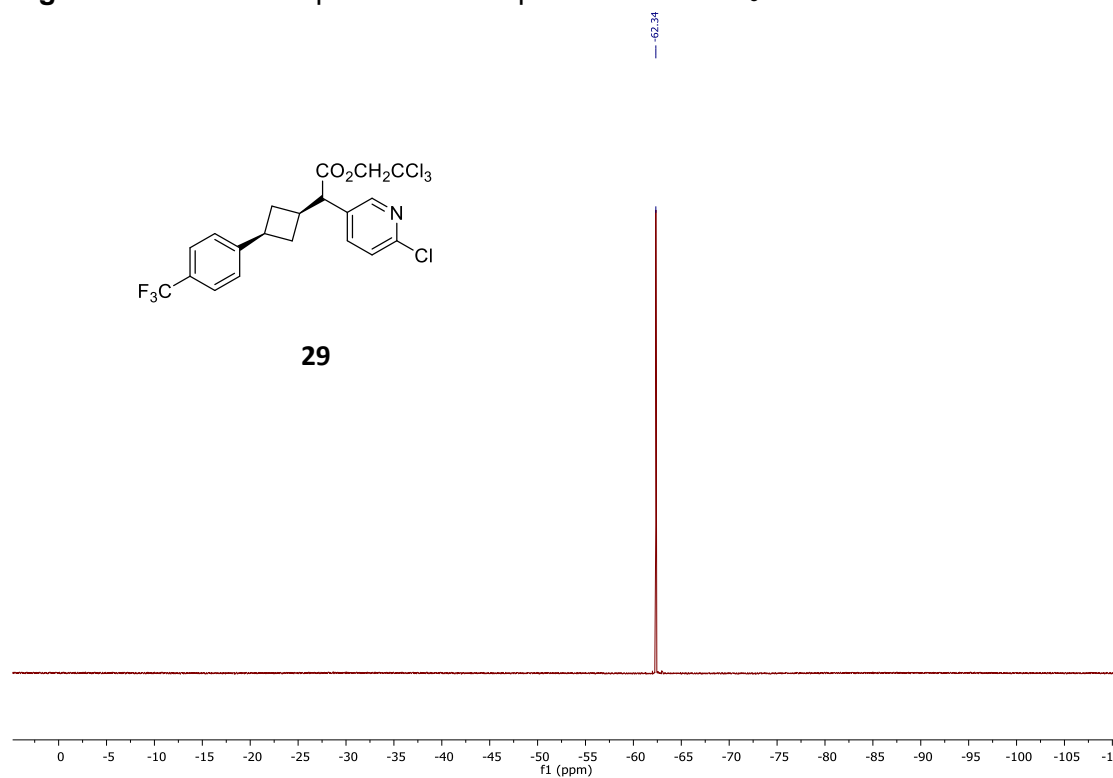

**Figure S84.**  $^1\text{H}$  NMR Spectrum of compound **30** in  $\text{CDCl}_3$ .

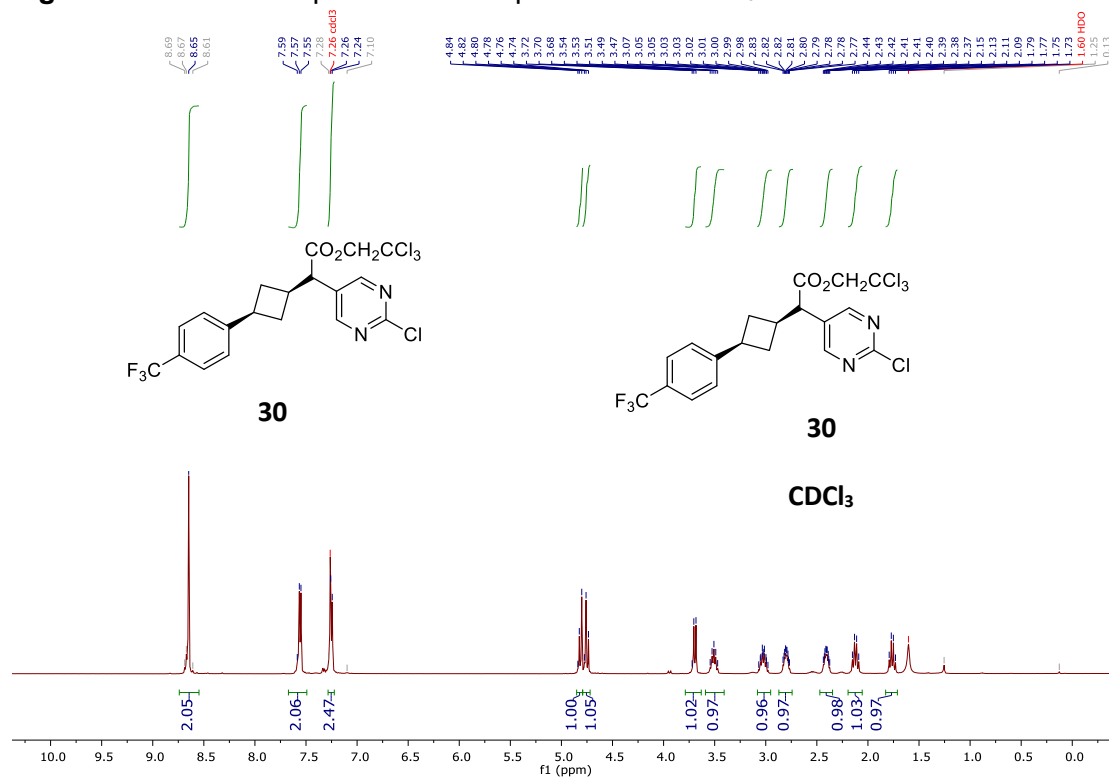

**Figure S85.**  $^{13}\text{C}$  NMR spectrum of compound **30** in  $\text{CDCl}_3$ .

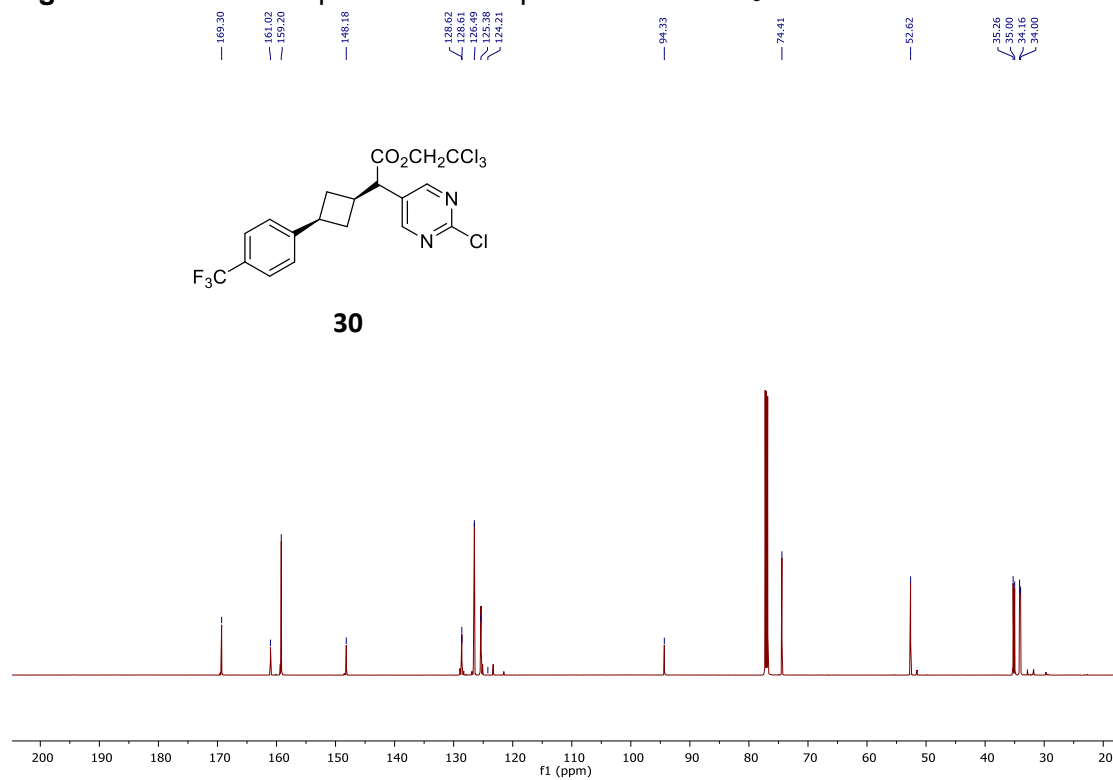

**Figure S86.**  $^{19}\text{F}$  NMR spectrum of compound **30** in  $\text{CDCl}_3$ .

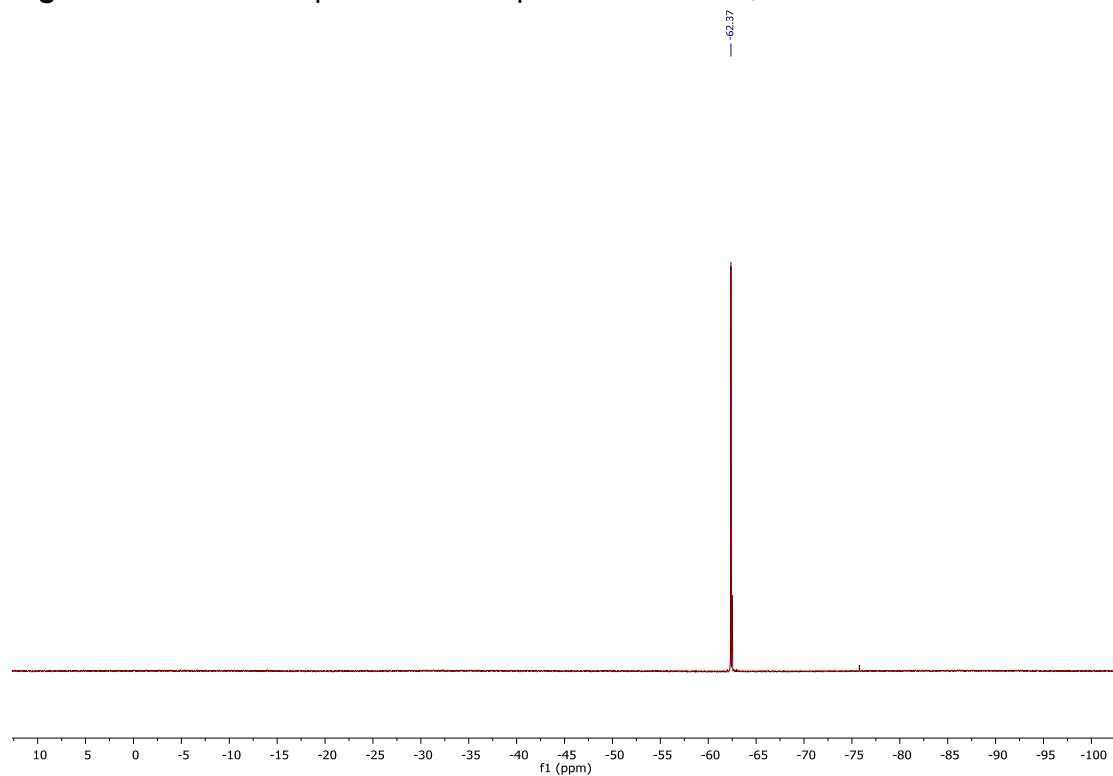

**Figure S87.**  $^1\text{H}$  NMR Spectrum of compound **31** in  $\text{CDCl}_3$ .

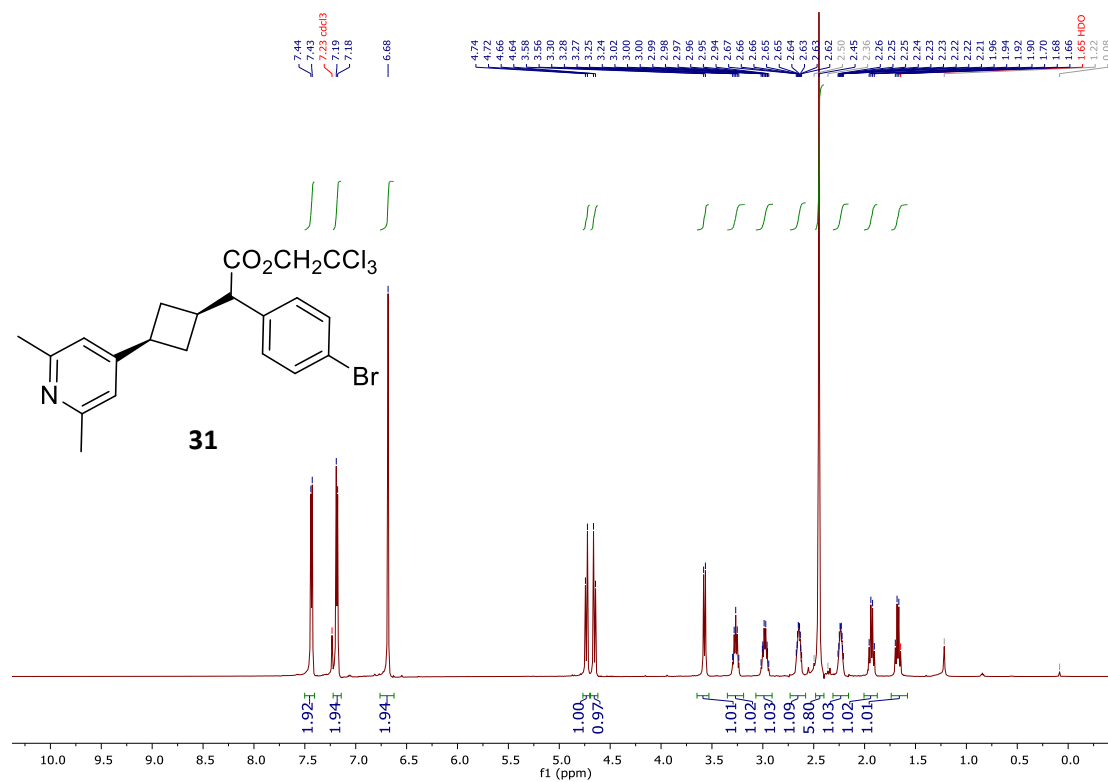

**Figure S88.**  $^{13}\text{C}$  NMR spectrum of compound **31** in  $\text{CDCl}_3$ .

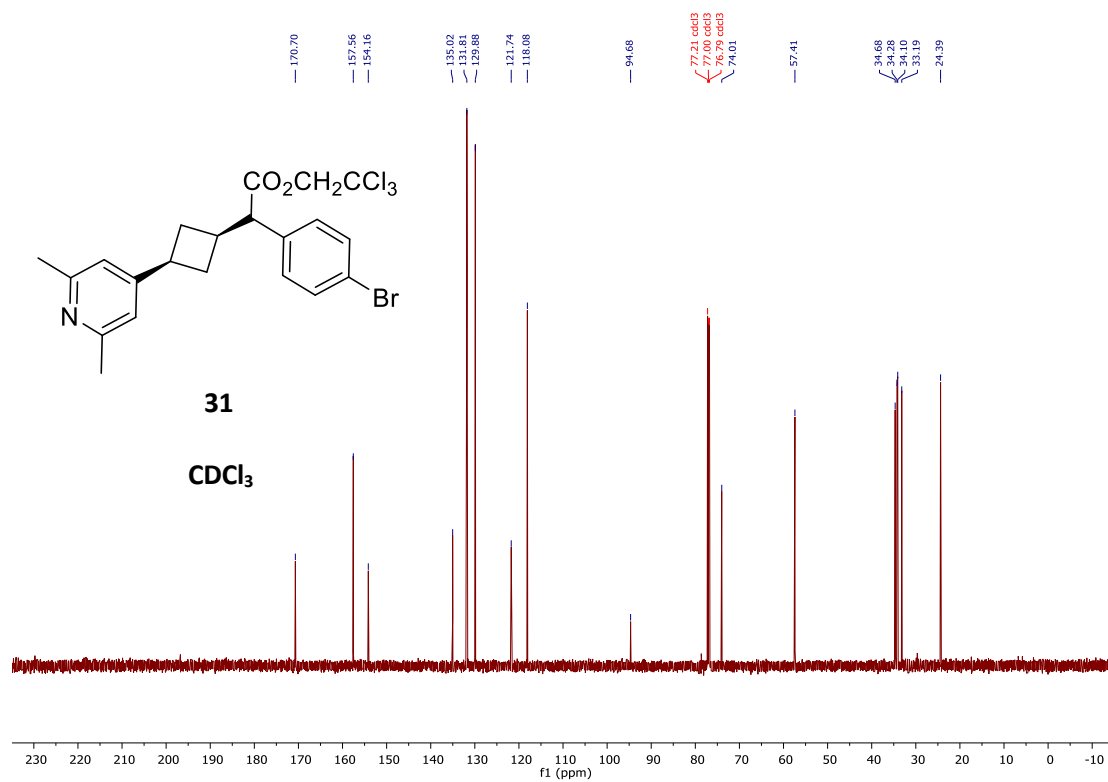

Chemical structure of compound **32**: COc1ccncc1[C@H]2CCC[C@H]2C(=O)O (Note: The structure in the image is 4-(4-methoxypyridin-2-yl)-4-(4-bromophenyl)-4-oxobutanoic acid, which is COc1ccncc1[C@H]2CCC[C@H]2C(=O)O with a 4-bromophenyl group). The structure shown is COc1ccncc1[C@H]2CCC[C@H]2C(=O)O with a 4-bromophenyl group.

<sup>1</sup>H NMR spectrum (CDCl<sub>3</sub>) of compound **32**. The x-axis represents the chemical shift in ppm (f1), ranging from 0.5 to 10.0. The spectrum shows several peaks corresponding to the structure, with integration values provided below the baseline.

Integration values (from left to right): 0.99, 2.16, 1.16, 2.20, 0.99, 1.00, 1.03, 3.18, 1.01, 1.11, 1.05, 1.00, 1.02, 1.00, 1.14.

**32**

Chemical structure of **32** is shown above the spectrum. The spectrum displays peaks from 32.74 to 170.78 ppm. Key peaks are labeled with their chemical shifts: 170.78, 162.78, 144.50, 136.85, 135.14, 131.82, 129.91, 121.74, 110.46, 94.72, 77.26, 77.01, 76.75, 74.06, 57.50, 53.34, 35.17, 32.74, and 32.74. The x-axis is labeled 'f1 (ppm)' and ranges from 10 to 210.

## Chiral High Performance Liquid Chromatography Data

**Figure S91.** Chiral HPLC trace for *rac*-XX prepared using Rh<sub>2</sub>[(R/S)-TCPTAD]<sub>4</sub>

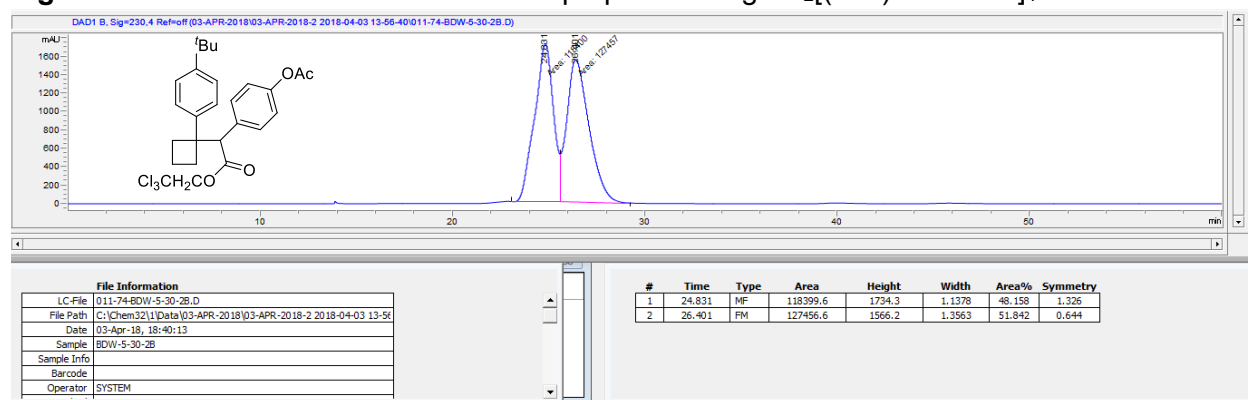

**Figure S92.** Chiral HPLC trace of compound **10** prepared using Rh<sub>2</sub>[(R)-TCPTAD]<sub>4</sub>

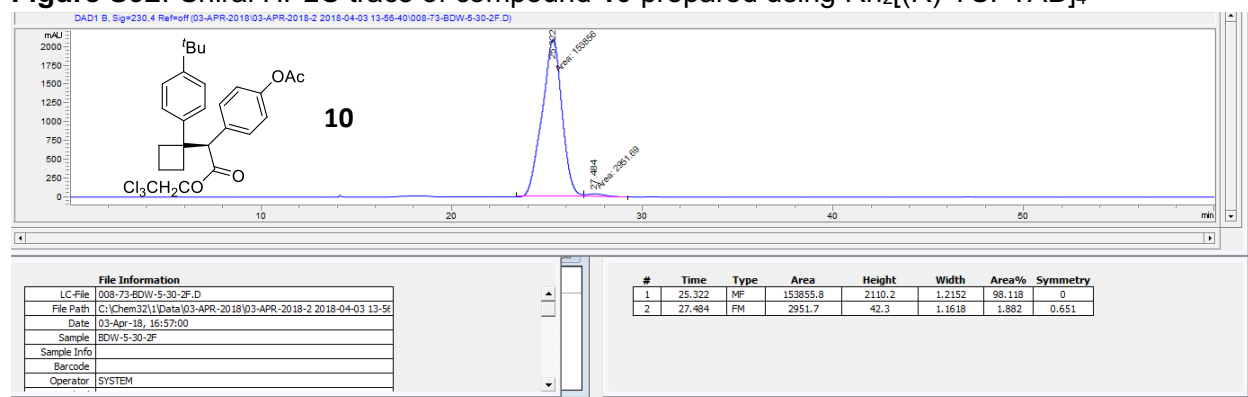

**Figure S93.** Chiral HPLC trace for *rac*-**11** prepared using Rh<sub>2</sub>[(R/S)-TCPTAD]<sub>4</sub>

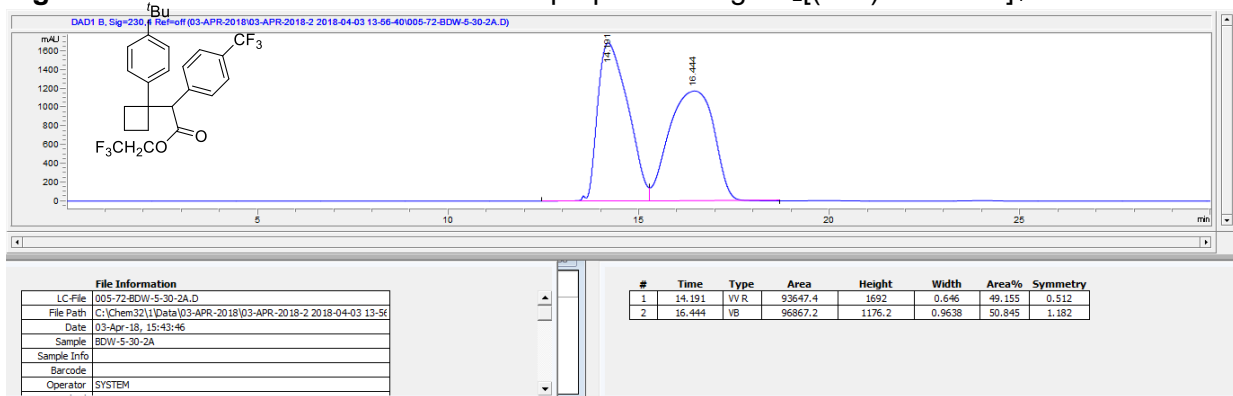

**Figure S94.** Chiral HPLC trace of compound **11** prepared using Rh<sub>2</sub>[(R)-TCPTAD]<sub>4</sub>

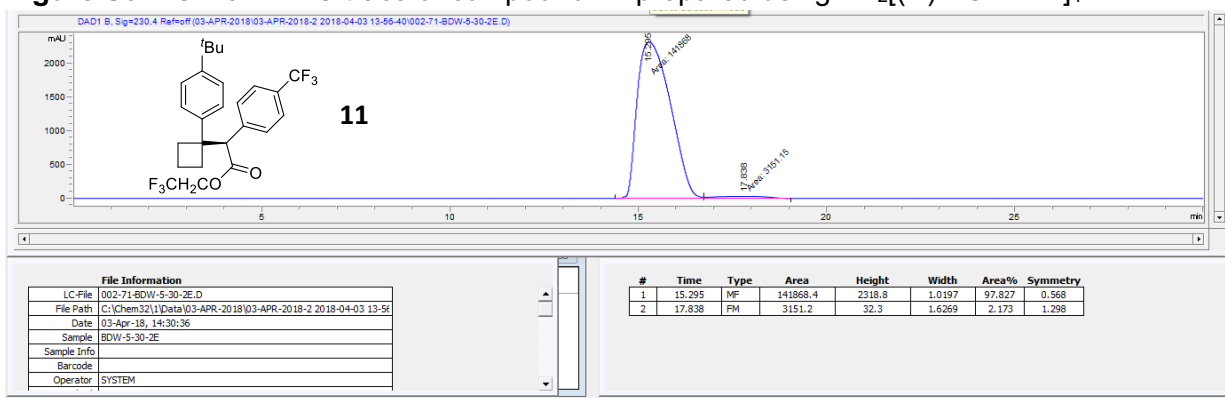

**Figure S95.** Chiral HPLC trace for *rac*-**12** prepared using Rh<sub>2</sub>[(R/S)-TCPTAD]<sub>4</sub>

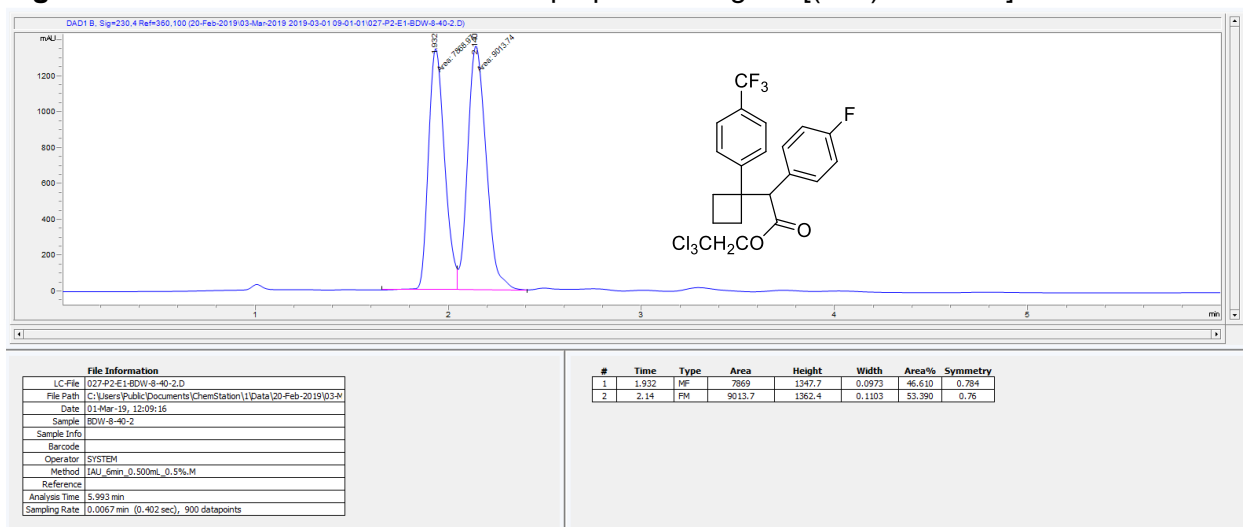

**Figure S96.** Chiral HPLC trace of compound **12** prepared using Rh<sub>2</sub>[(R)-TCPTAD]<sub>4</sub>

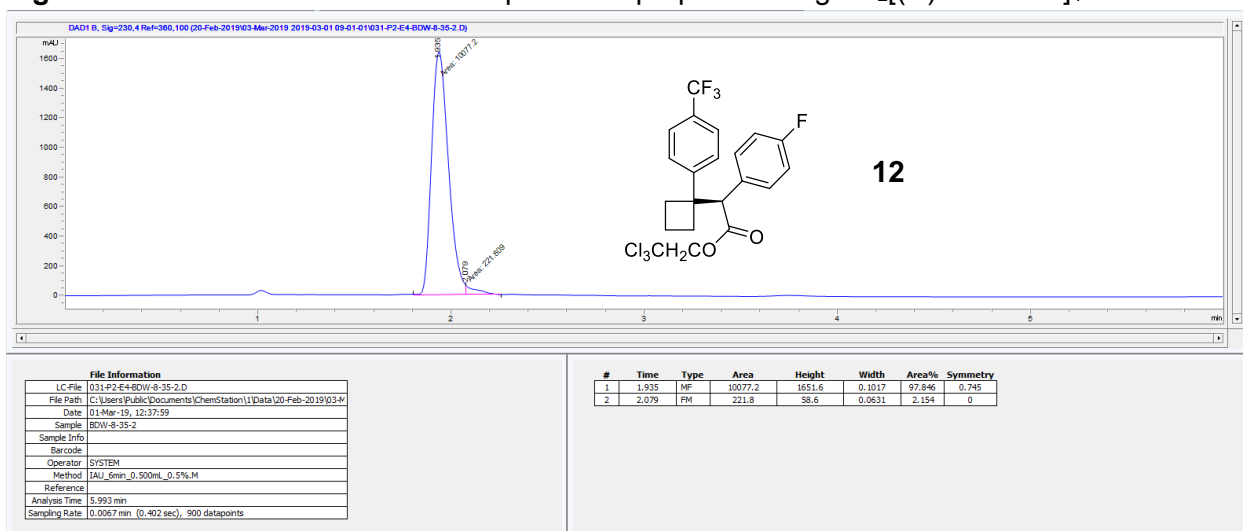

**Figure S97.** Chiral HPLC trace for *rac*-**13** prepared using Rh<sub>2</sub>[(R/S)-TCPTAD]<sub>4</sub>

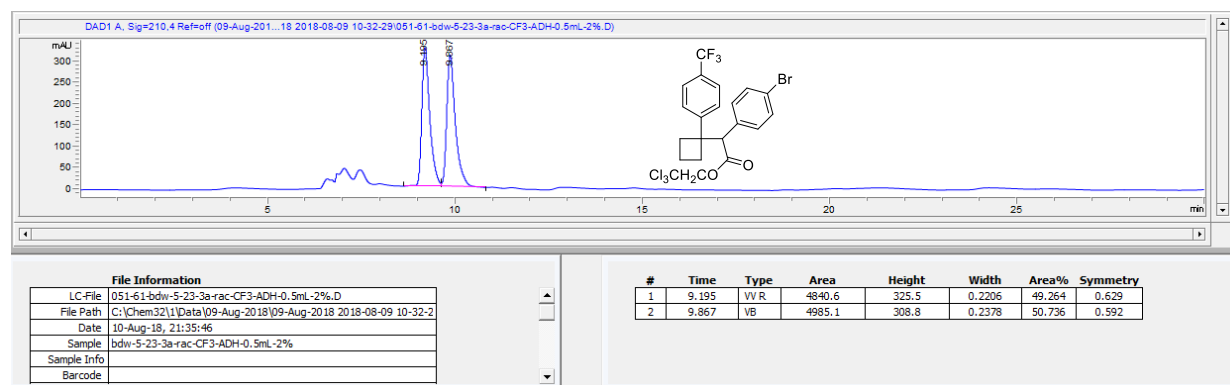

**Figure S98.** Chiral HPLC trace of compound **13** prepared using Rh<sub>2</sub>[(R)-TCPTAD]<sub>4</sub>

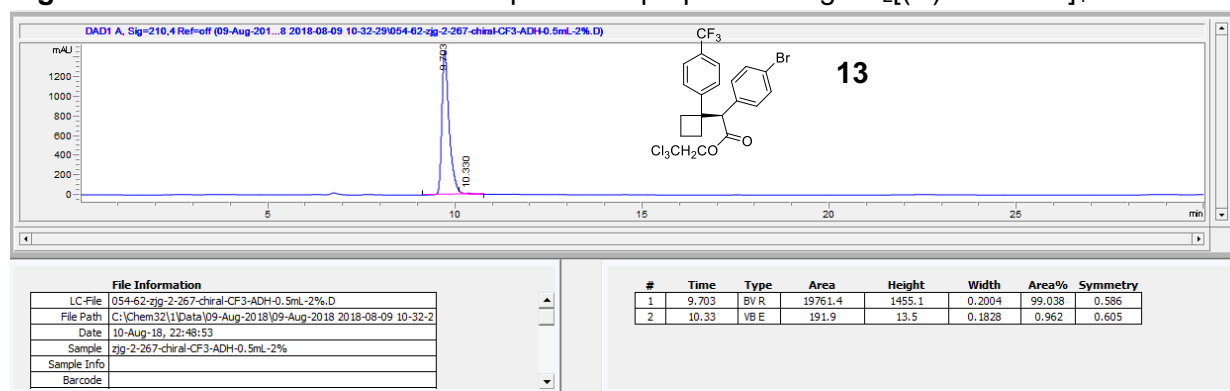

**Figure S99.** Chiral HPLC trace for *rac*-14 prepared using Rh<sub>2</sub>[(R/S)-TCPTAD]<sub>4</sub>

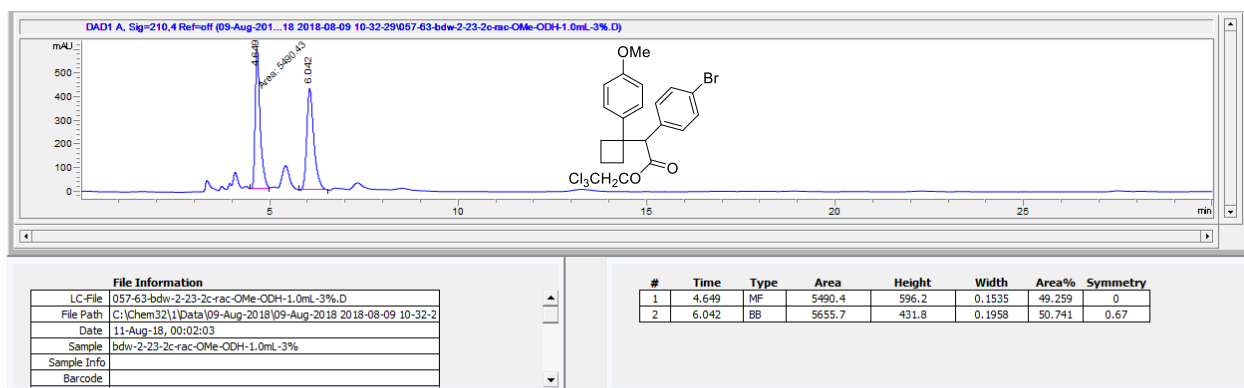

**Figure S100.** Chiral HPLC trace of compound **14** prepared using Rh<sub>2</sub>[(R)-TCPTAD]<sub>4</sub>

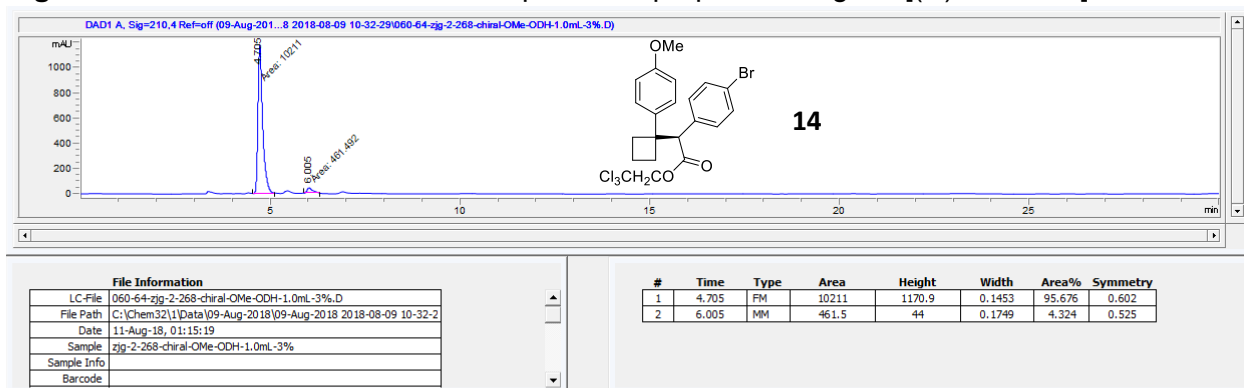

**Figure S101.** Chiral HPLC trace for *rac*-**15** prepared using Rh<sub>2</sub>[(R/S)-TCPTAD]<sub>4</sub>

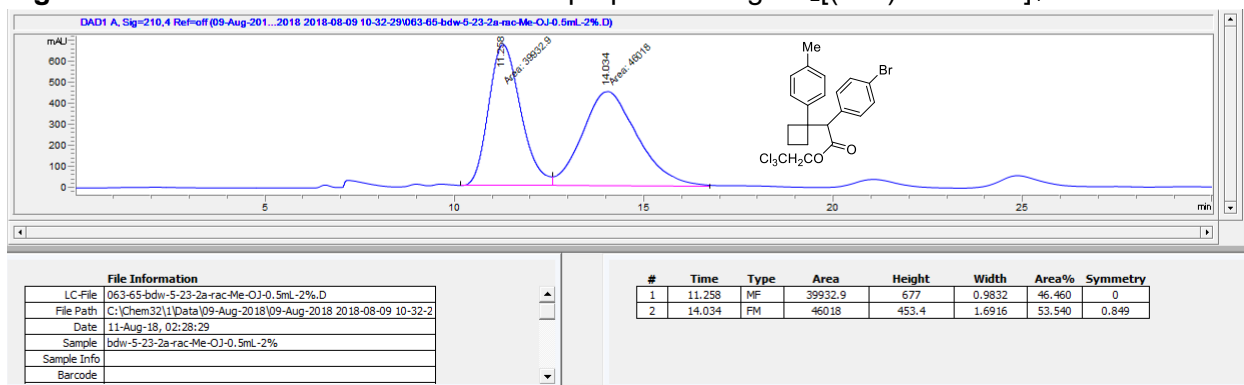

**Figure S102.** Chiral HPLC trace of compound **15** prepared using Rh<sub>2</sub>[(R)-TCPTAD]<sub>4</sub>

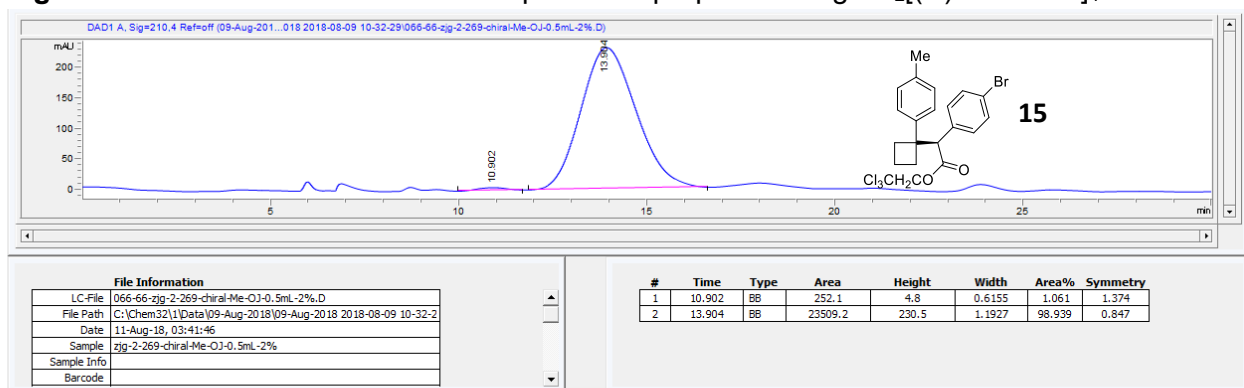

**Figure S103.** Chiral HPLC trace for *rac*-**16** prepared using Rh<sub>2</sub>[(R/S)-TCPTAD]<sub>4</sub>

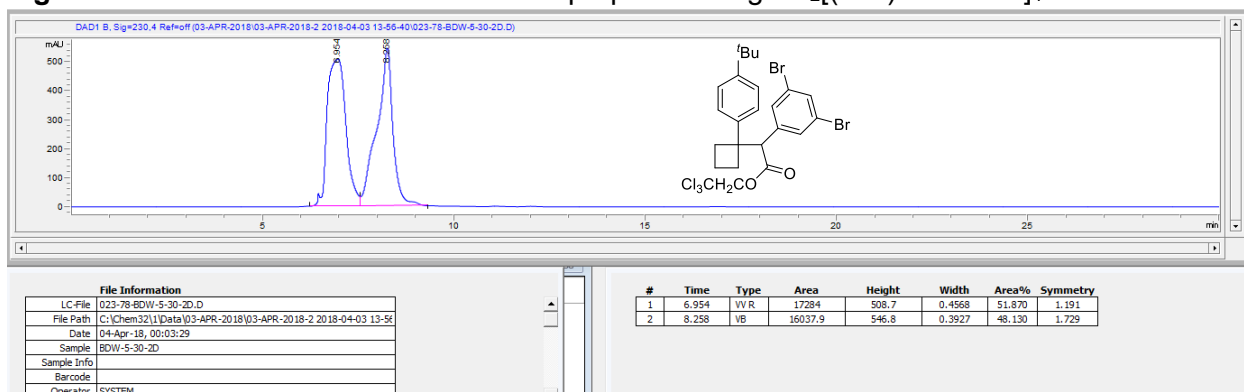

**Figure S104.** Chiral HPLC trace of compound **16** prepared using Rh<sub>2</sub>[(R)-TCPTAD]<sub>4</sub>

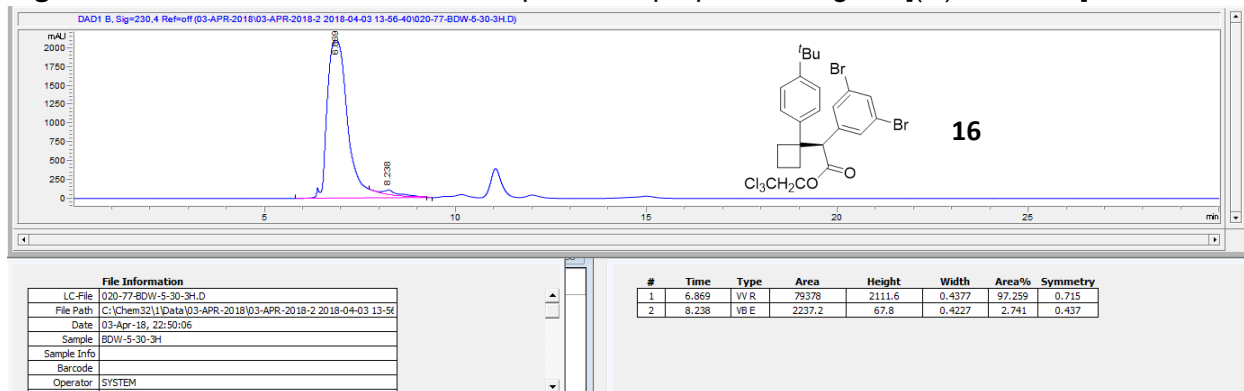

**Figure S105.** Chiral HPLC trace for *rac*-**17** prepared using Rh<sub>2</sub>[(R/S)-TCPTAD]<sub>4</sub>

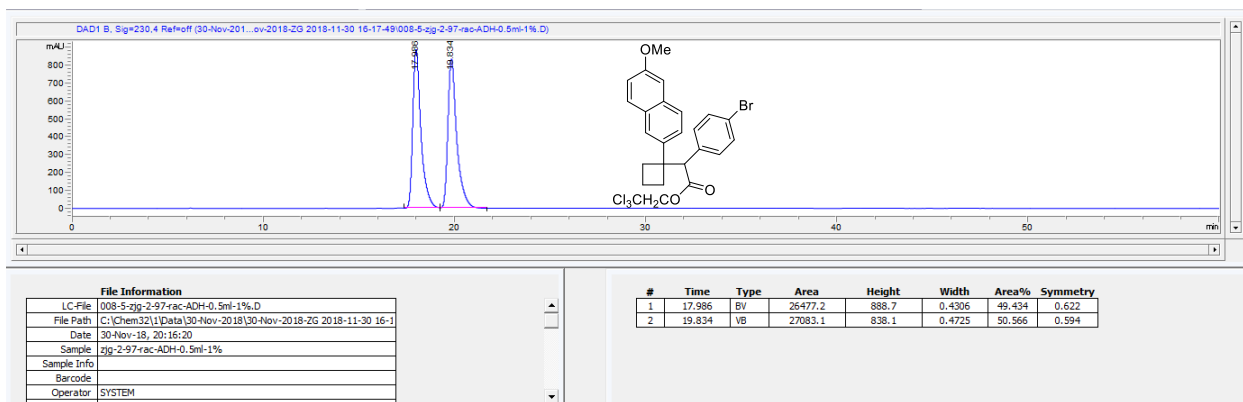

**Figure S106.** Chiral HPLC trace of compound **17** prepared using Rh<sub>2</sub>[(R)-TCPTAD]<sub>4</sub>

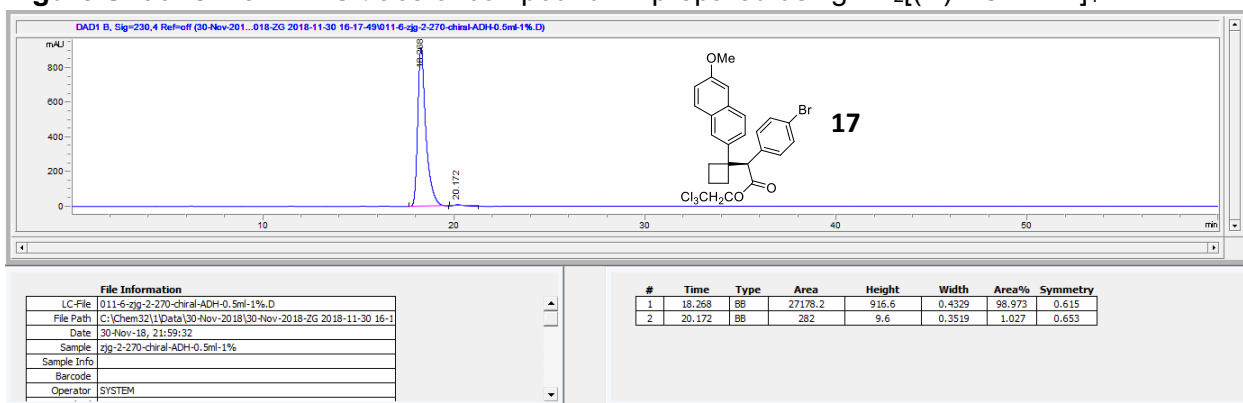

**Figure S107.** Chiral HPLC trace for *rac*-**18** prepared using Rh<sub>2</sub>[(R/S)-TCPTAD]<sub>4</sub>

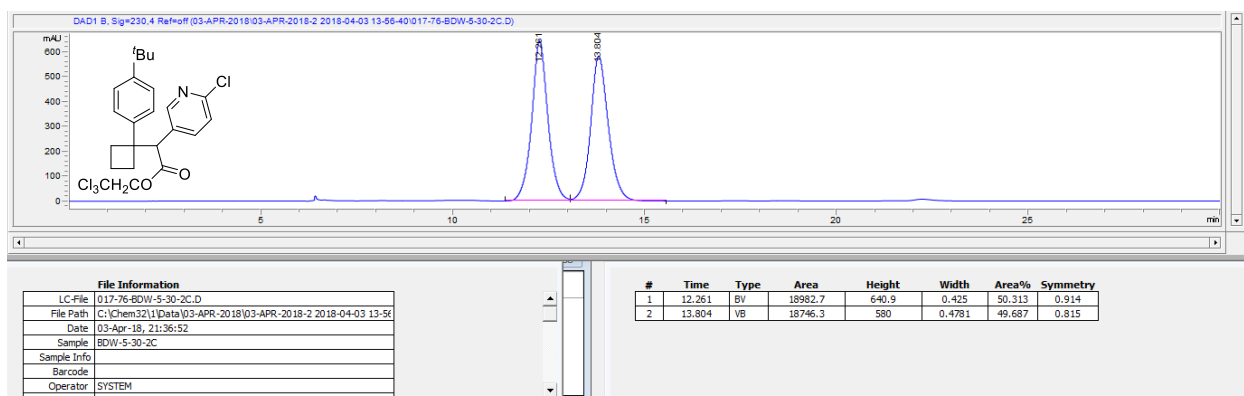

**Figure S108.** Chiral HPLC trace of compound **18** prepared using Rh<sub>2</sub>[(R)-TCPTAD]<sub>4</sub>

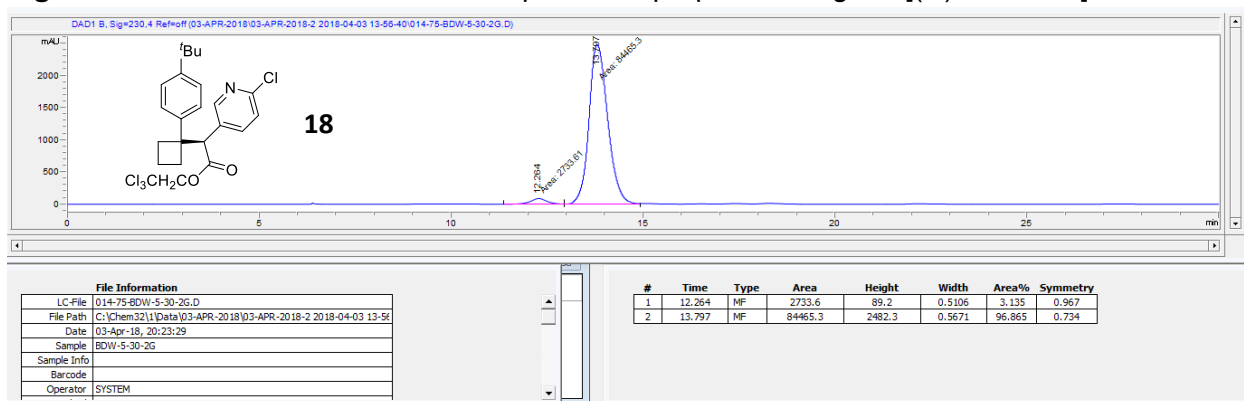

**Figure S109.** Chiral HPLC trace for *rac*-**19** prepared using Rh<sub>2</sub>[(R/S)-TCPTAD]<sub>4</sub>

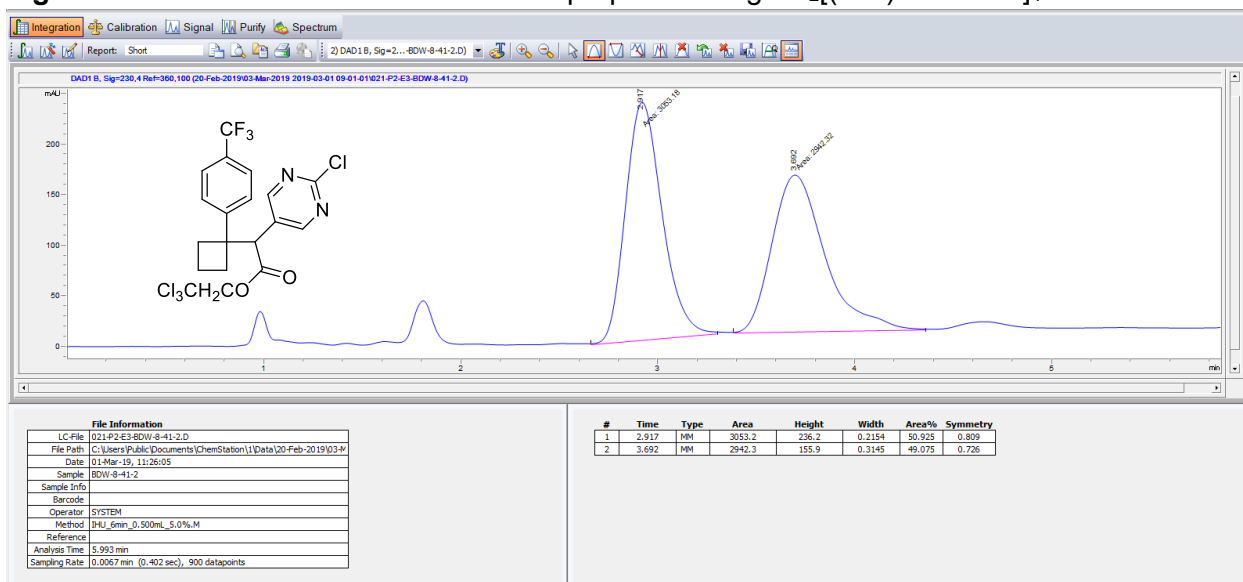

**Figure S110.** Chiral HPLC trace of compound **19** prepared using Rh<sub>2</sub>[(R)-TCPTAD]<sub>4</sub>

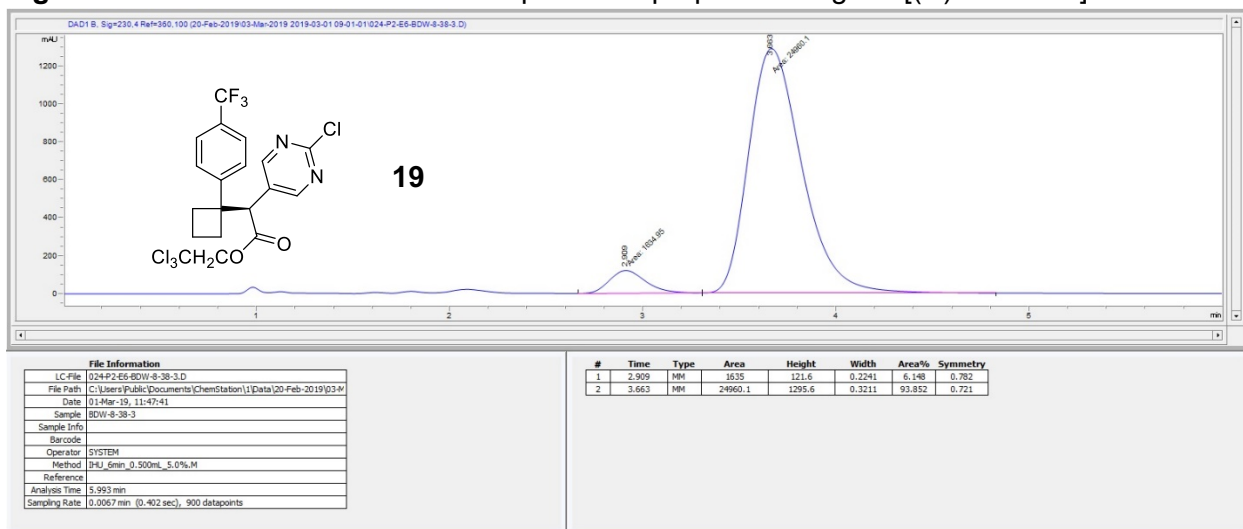

**Figure S111.** Chiral HPLC trace for *rac*-**20** prepared using Rh<sub>2</sub>[(R/S)-TCPTAD]<sub>4</sub>

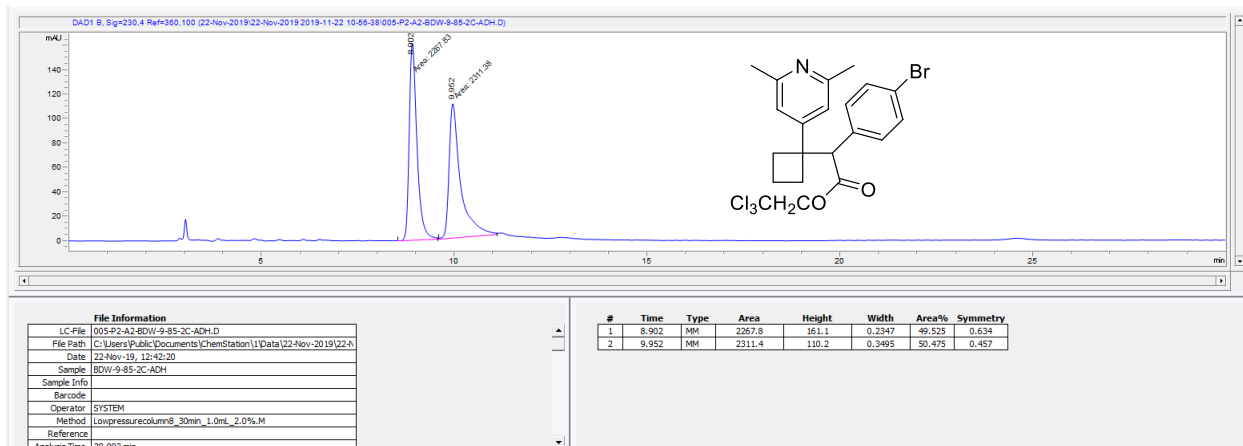

**Figure S112.** Chiral HPLC trace of compound **20** prepared using Rh<sub>2</sub>[(R)-TCPTAD]<sub>4</sub>

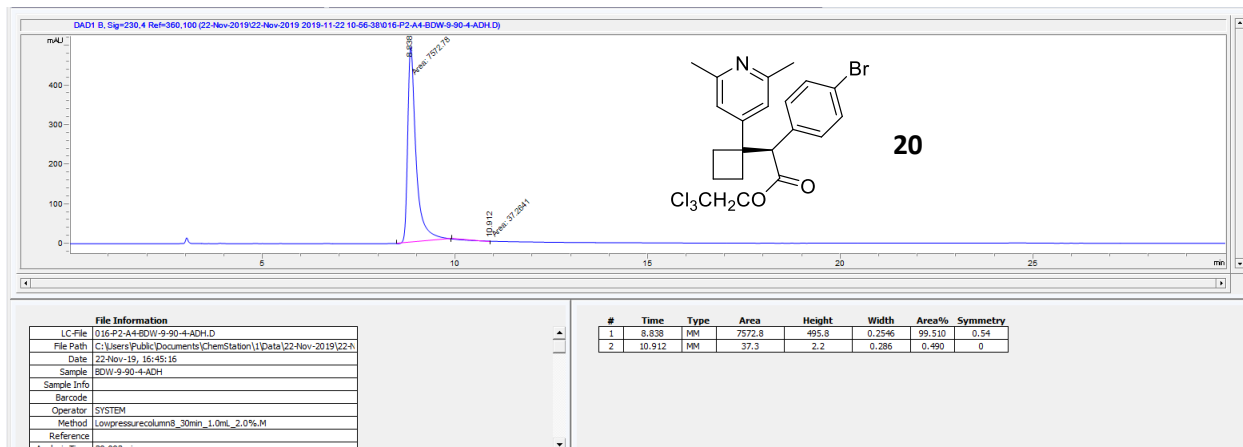

**Figure S113.** Chiral HPLC trace for *rac*-**21** prepared using Rh<sub>2</sub>[(R/S)-TCPTAD]<sub>4</sub>

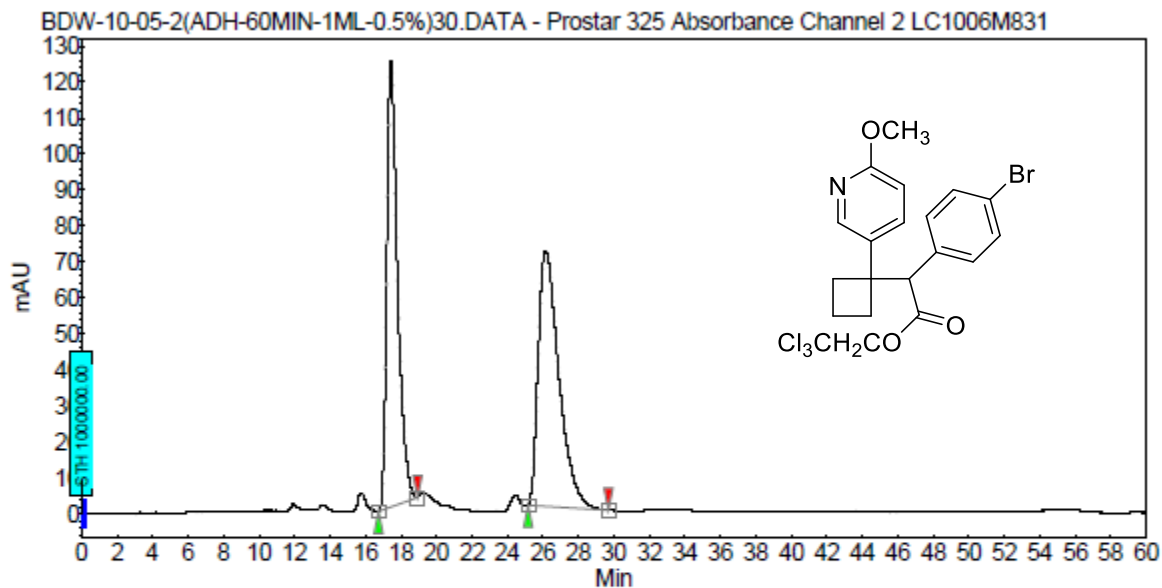

**Peak results :**

| Index | Name    | Time<br>[Min] | Quantity<br>[% Area] | Height<br>[mAU] | Area<br>[mAU.Min] | Area %<br>[%] |
|-------|---------|---------------|----------------------|-----------------|-------------------|---------------|
| 1     | UNKNOWN | 17.44         | 47.48                | 123.9           | 86.6              | 47.482        |
| 2     | UNKNOWN | 26.16         | 52.52                | 71.1            | 95.8              | 52.518        |
| Total |         |               | 100.00               | 194.9           | 182.4             | 100.000       |

**Figure S114.** Chiral HPLC trace of compound **21** prepared using  $\text{Rh}_2[(\text{R})\text{-TCPTAD}]_4$

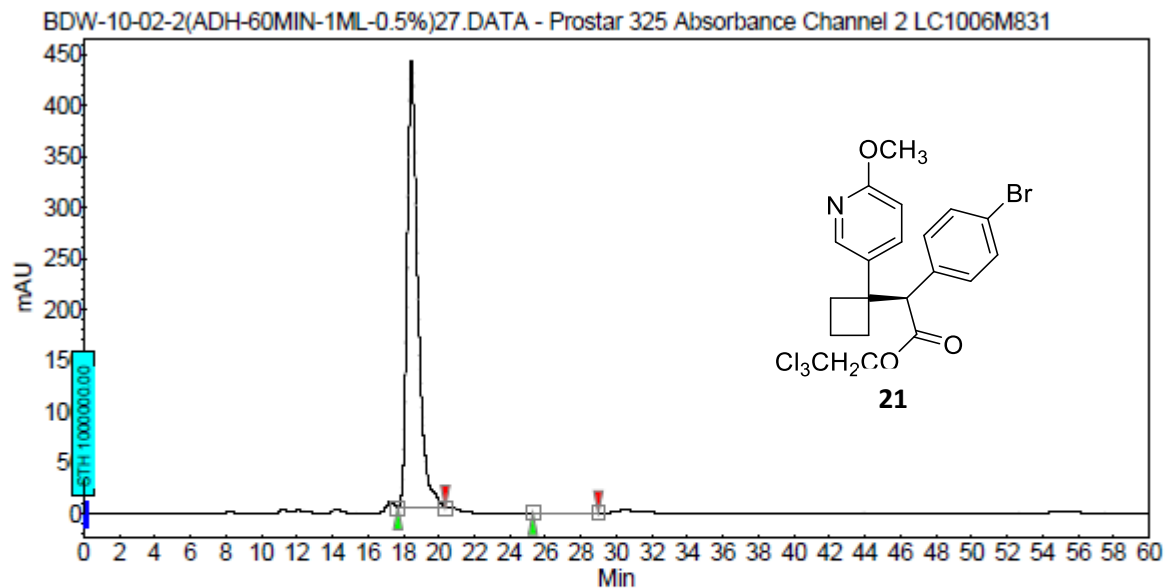

**Peak results :**

| Index | Name    | Time [Min] | Quantity [% Area] | Height [mAU] | Area [mAU.Min] | Area % [%] |
|-------|---------|------------|-------------------|--------------|----------------|------------|
| 2     | UNKNOWN | 18.46      | 99.83             | 436.8        | 306.4          | 99.826     |
| 1     | UNKNOWN | 27.09      | 0.17              | 0.3          | 0.5            | 0.174      |
| Total |         |            | 100.00            | 437.1        | 306.9          | 100.000    |

**Figure S115.** Chiral HPLC trace for *rac*-**9** prepared using Rh<sub>2</sub>[(R/S)-2-Cl-5-BrTPCP]<sub>4</sub>

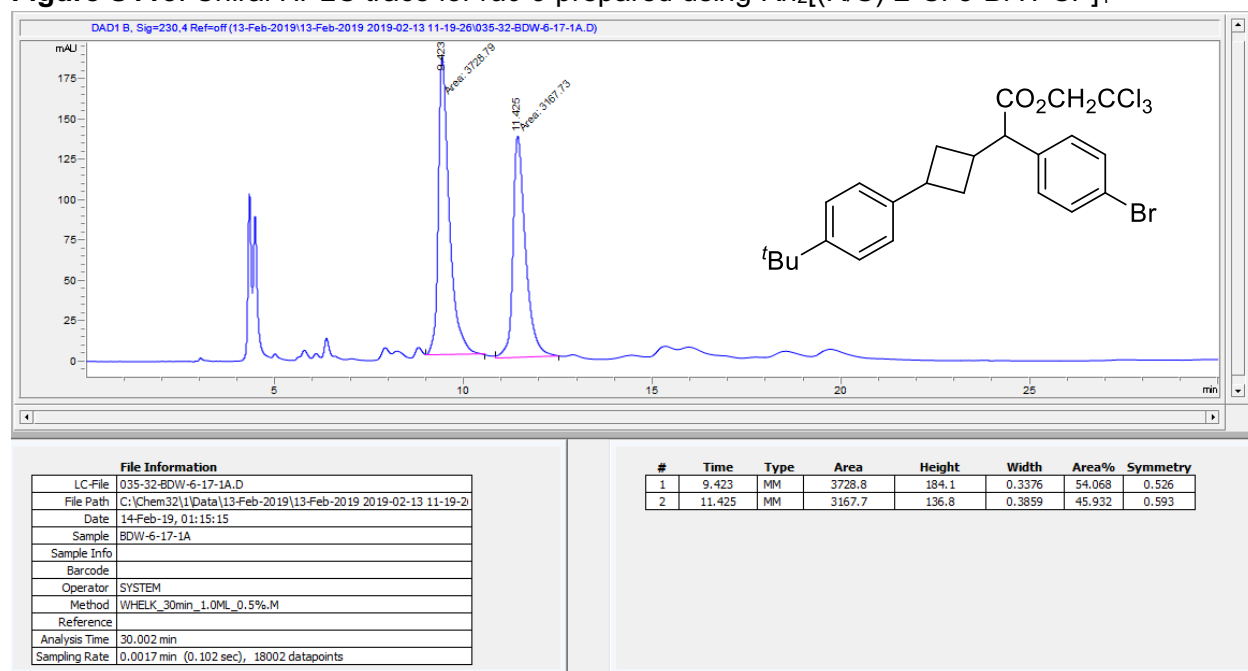

**Figure S116.** Chiral HPLC trace of compound **9** prepared using Rh<sub>2</sub>[(S)-2-Cl-5-BrTPCP]<sub>4</sub>

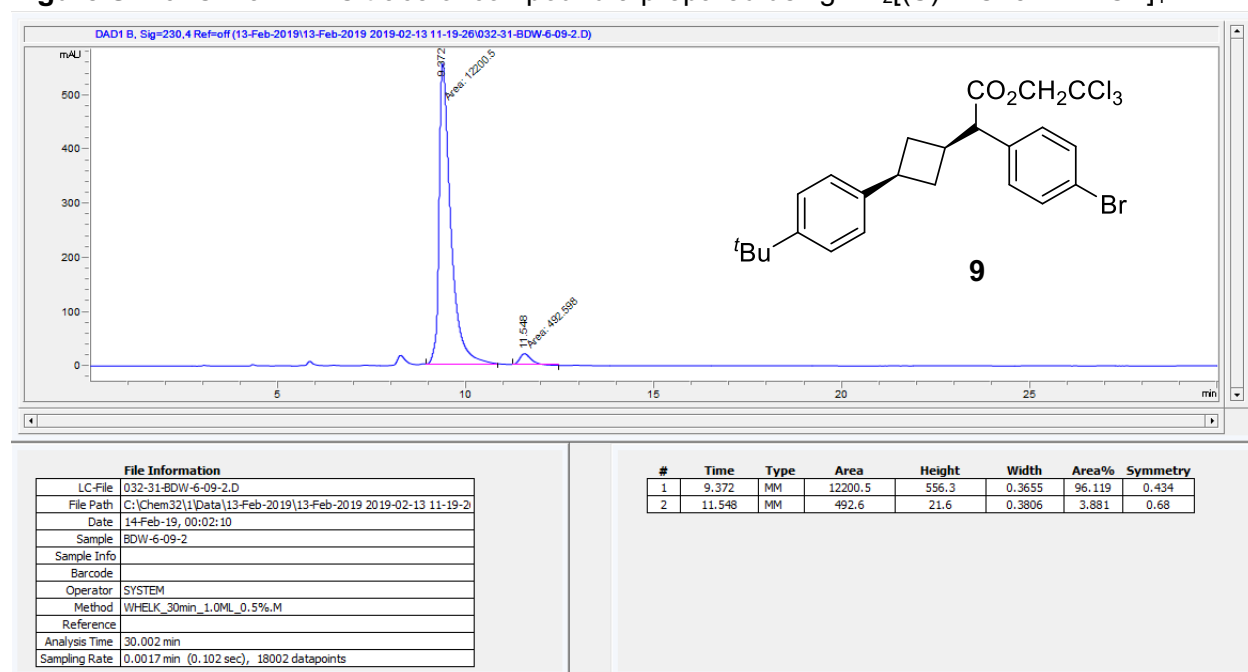

**Figure S117.** Chiral HPLC trace for *rac*-**22** prepared using Rh<sub>2</sub>[(R/S)-2-Cl-5-BrTPCP]<sub>4</sub>

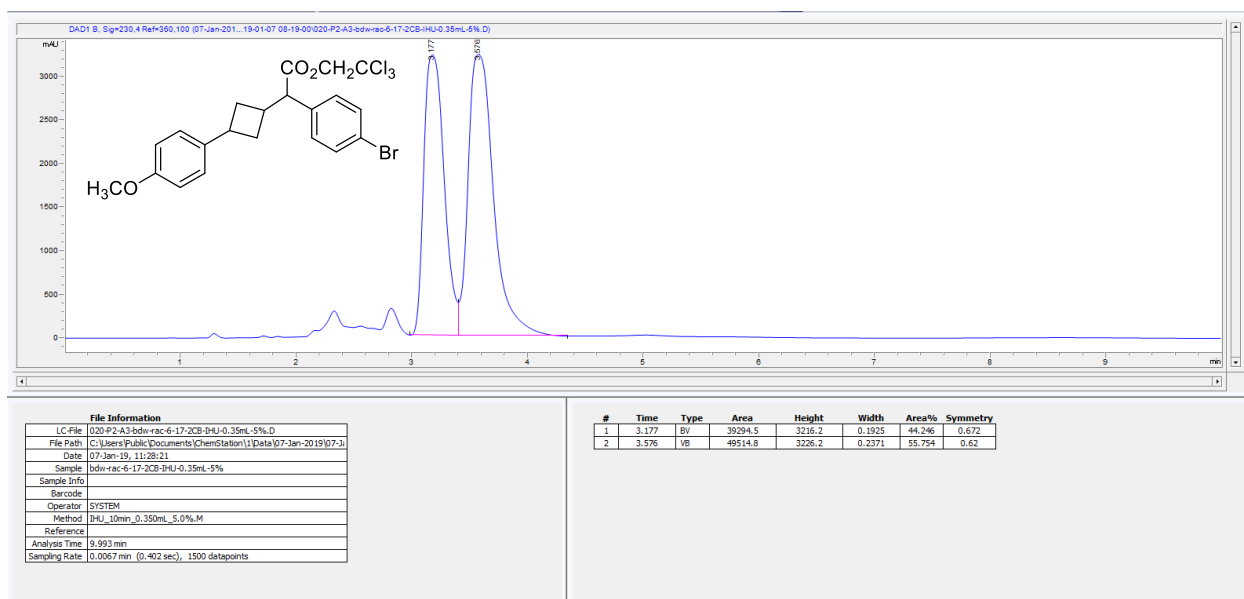

**Figure S118.** Chiral HPLC trace of compound **22** prepared using Rh<sub>2</sub>[(S)-2-Cl-5-BrTPCP]<sub>4</sub>

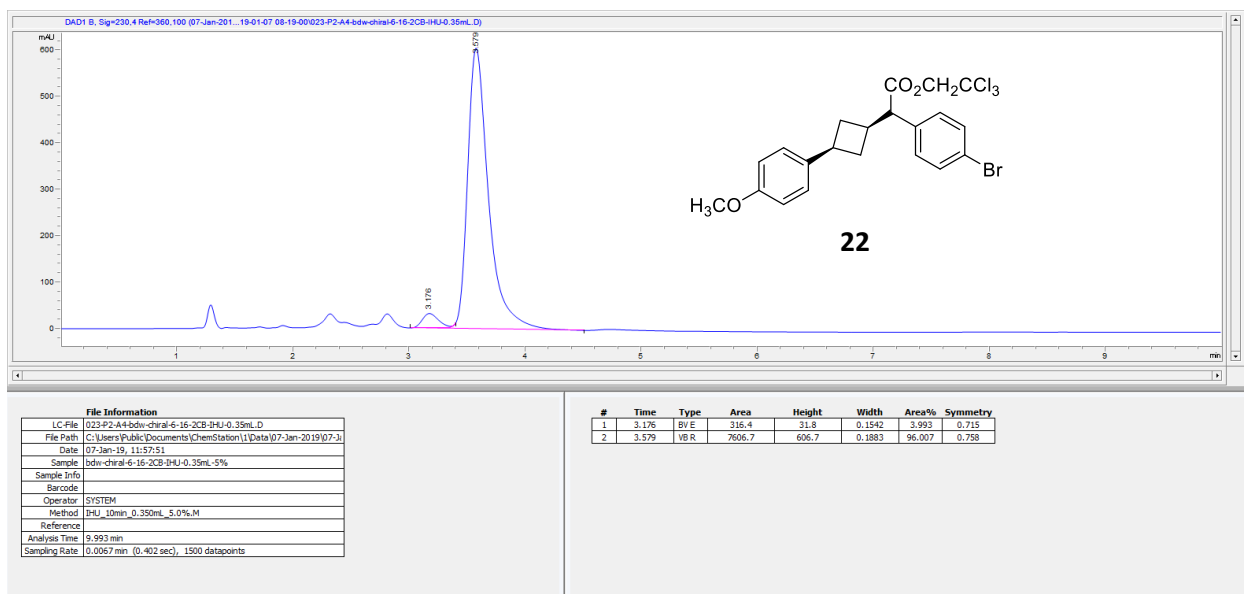

**Figure S119.** Chiral HPLC trace for *rac*-**23** prepared using Rh<sub>2</sub>[(R/S)-2-Cl-5-BrTPCP]<sub>4</sub>

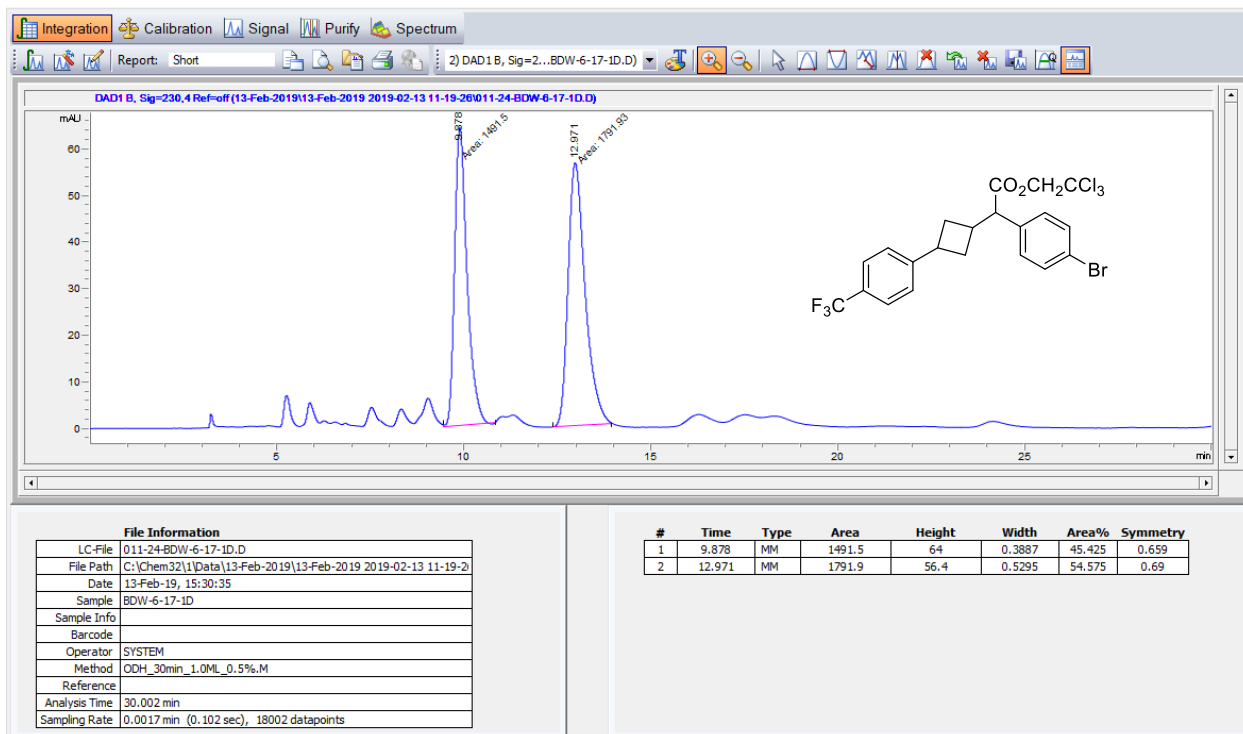

**Figure S120.** Chiral HPLC trace of compound **XX** prepared using Rh<sub>2</sub>[(S)-2-Cl-5-BrTPCP]<sub>4</sub>

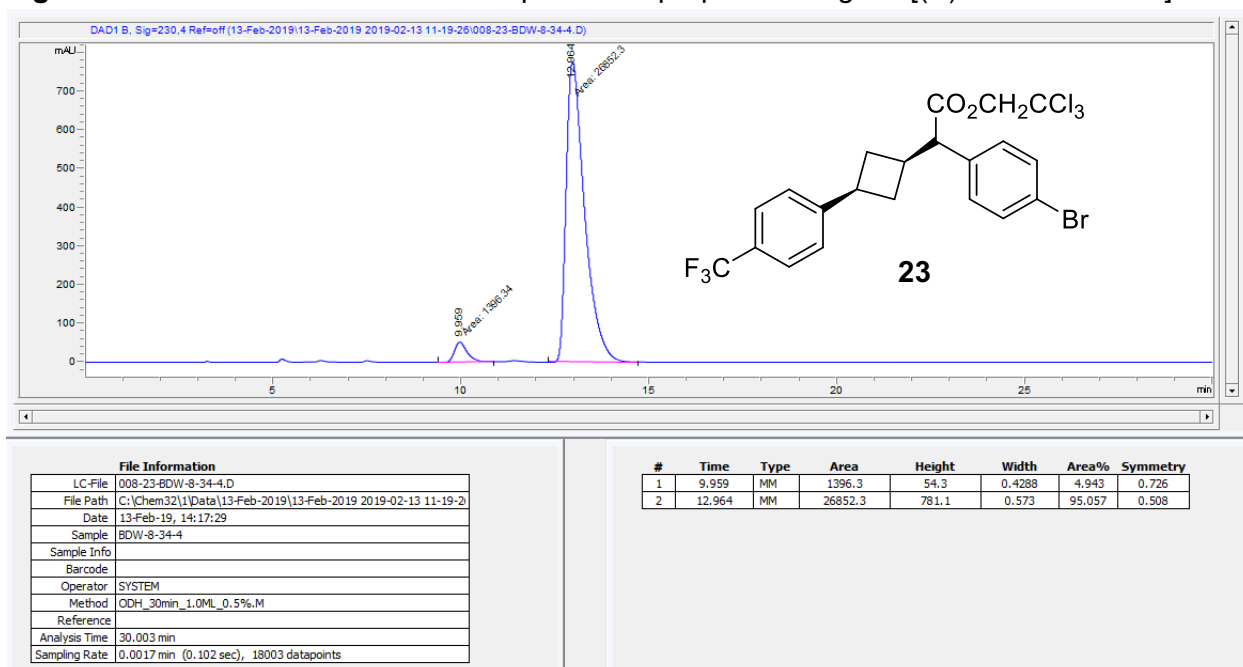

**Figure S121.** Chiral HPLC trace for *rac*-**24** prepared using Rh<sub>2</sub>[(R/S)-2-Cl-5-BrTPCP]<sub>4</sub>

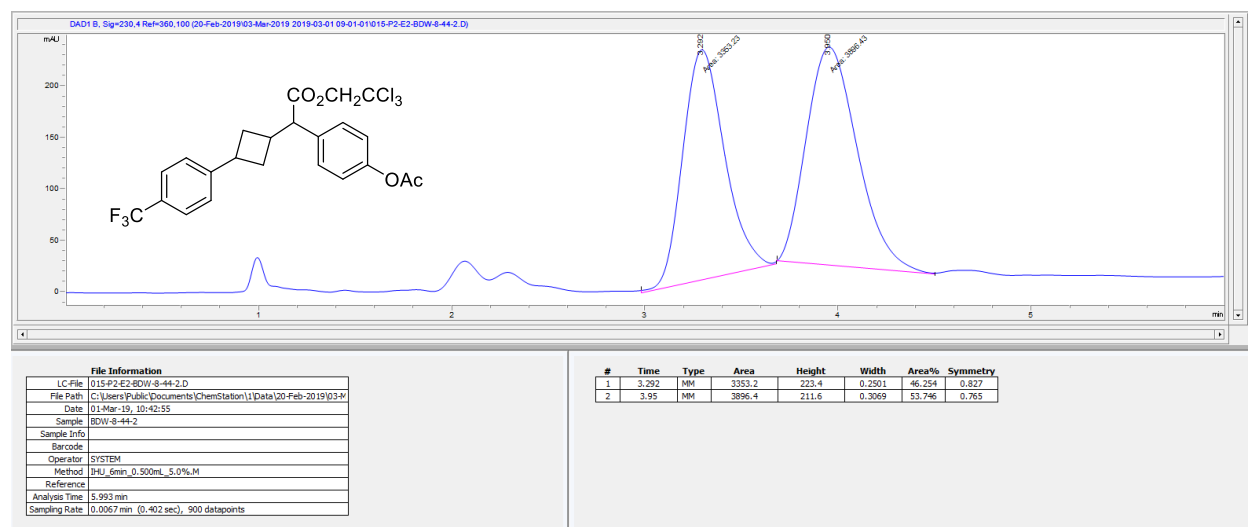

**Figure S122.** Chiral HPLC trace of compound **24** prepared using Rh<sub>2</sub>[(S)-2-Cl-5-BrTPCP]<sub>4</sub>

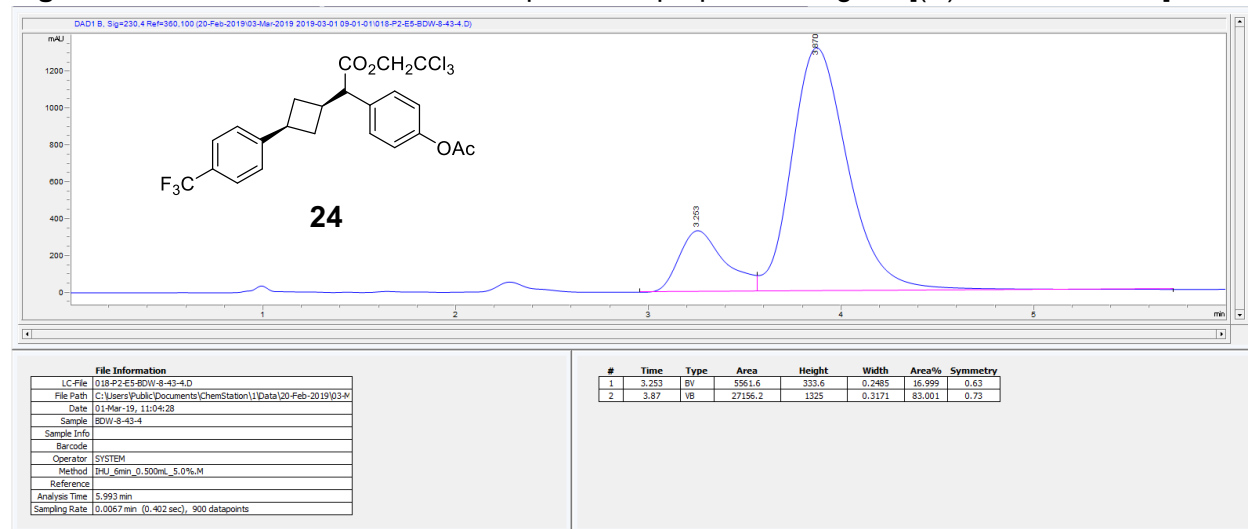

**Figure S123.** Chiral HPLC trace for *rac*-**25** prepared using Rh<sub>2</sub>[(R/S)-2-Cl-5-BrTPCP]<sub>4</sub>

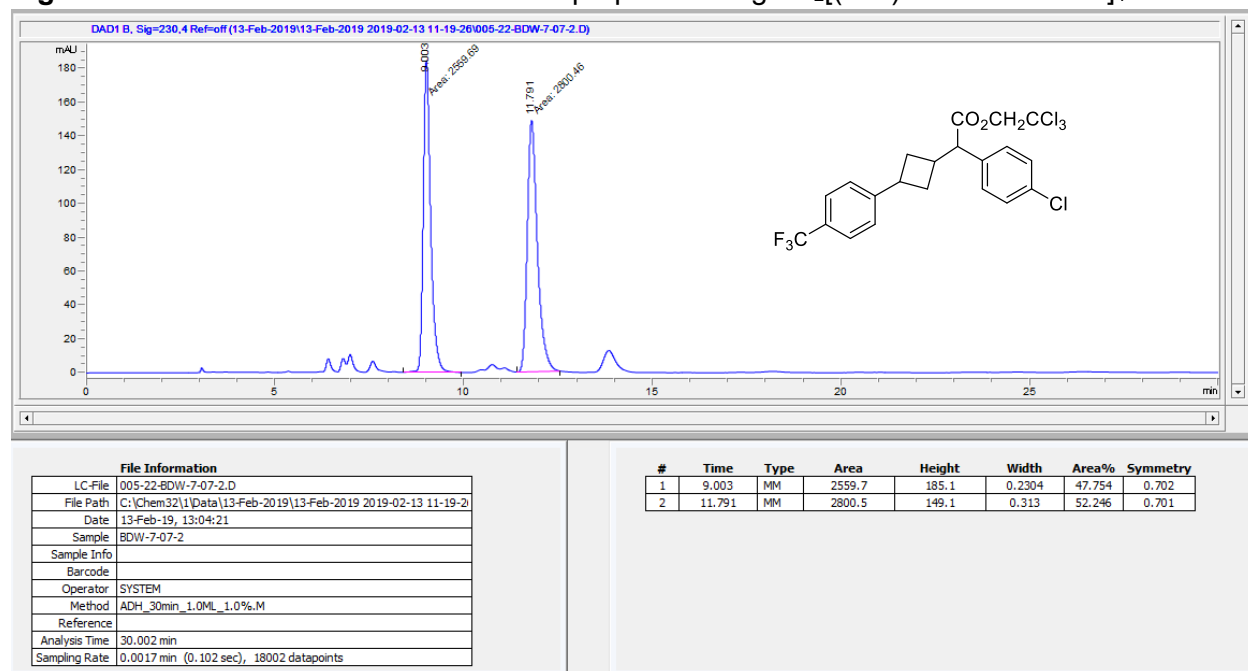

**Figure S124.** Chiral HPLC trace of compound **25** prepared using Rh<sub>2</sub>[(S)-2-Cl-5-BrTPCP]<sub>4</sub>

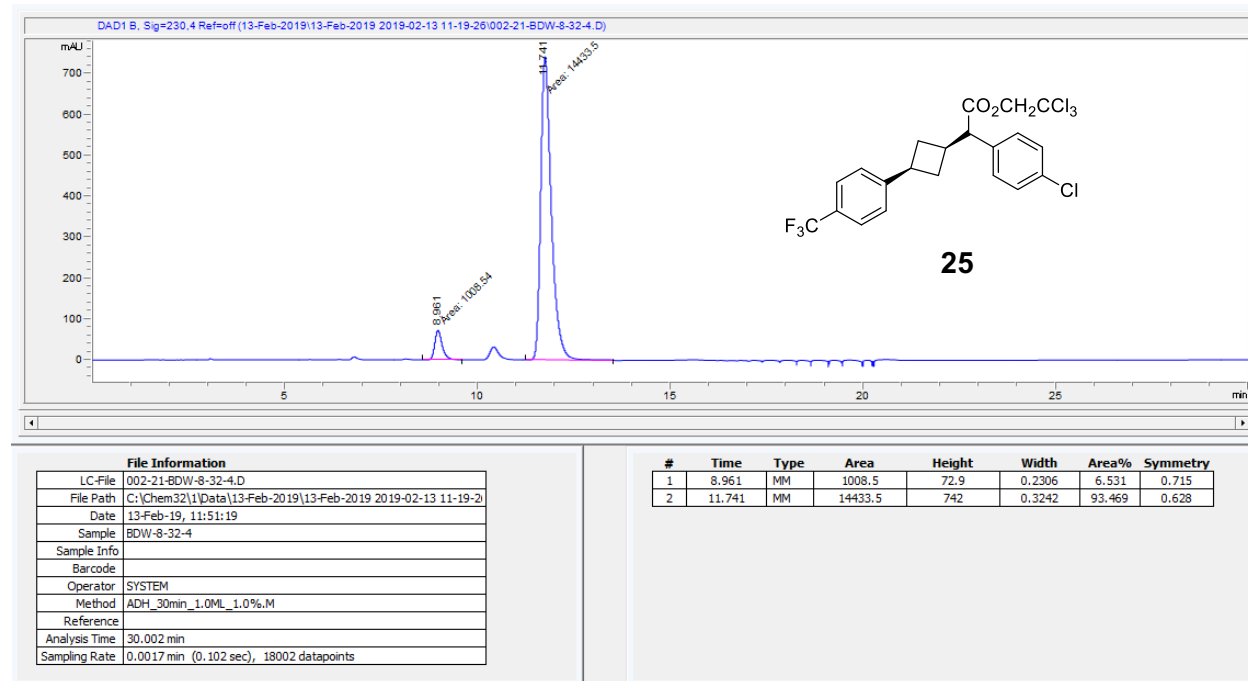

**Figure S125.** Chiral HPLC trace for *rac*-**25** prepared using Rh<sub>2</sub>[(R/S)-2-Cl-5-BrTPCP]<sub>4</sub>

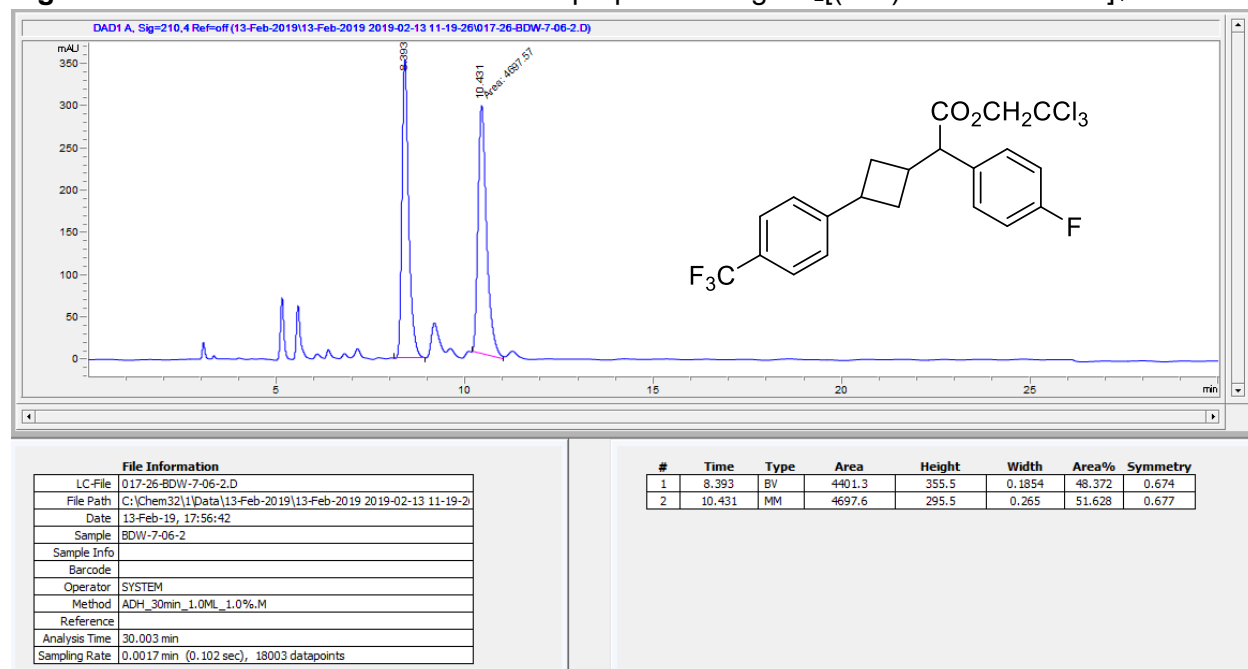

**Figure S126.** Chiral HPLC trace of compound **26** prepared using Rh<sub>2</sub>[(S)-2-Cl-5-BrTPCP]<sub>4</sub>

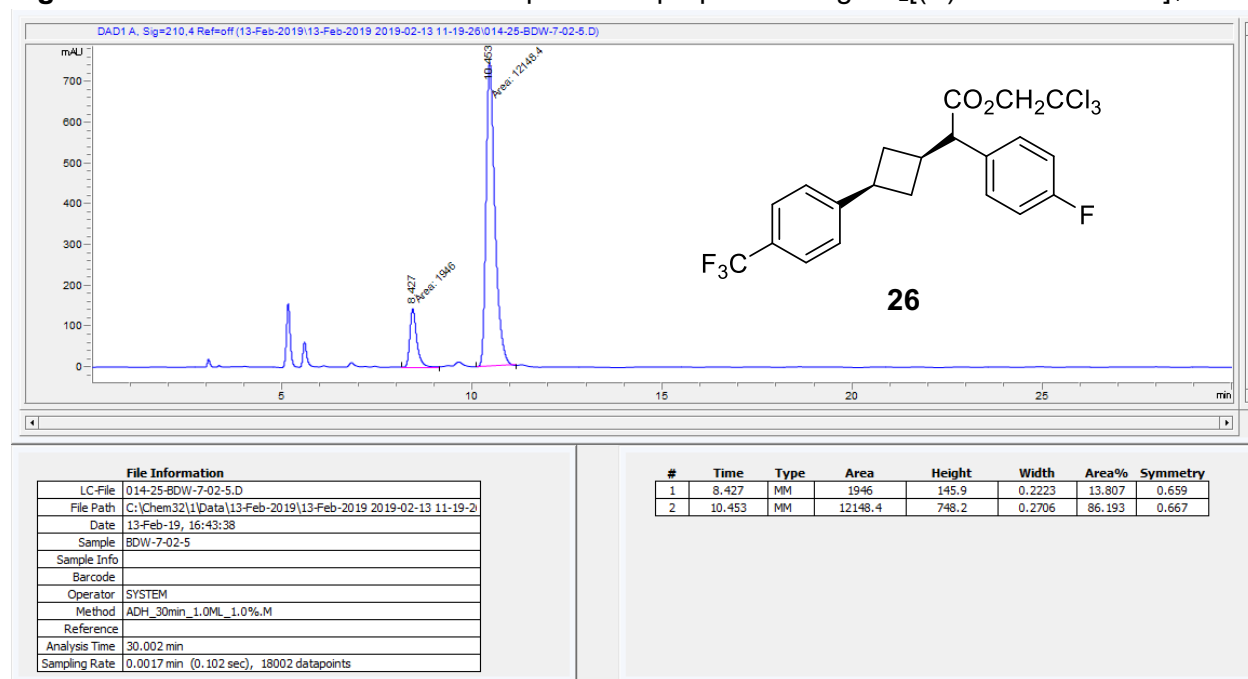

**Figure S127.** Chiral HPLC trace for *rac*-**27** prepared using Rh<sub>2</sub>[(R/S)-2-Cl-5-BrTPCP]<sub>4</sub>

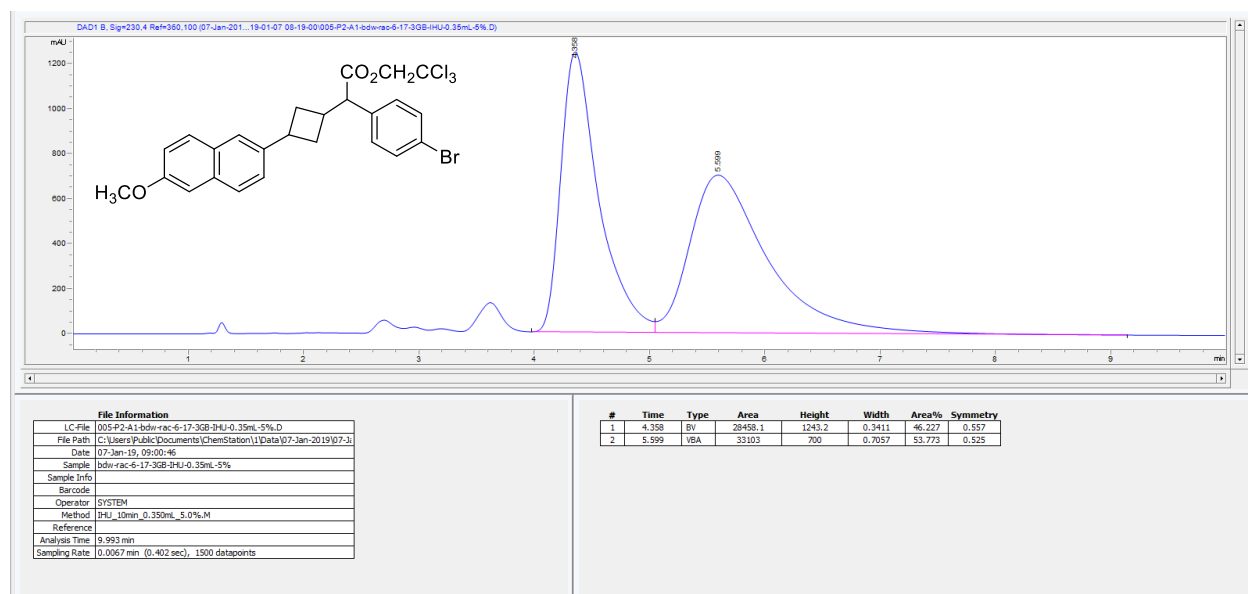

**Figure S128.** Chiral HPLC trace of compound **27** prepared using Rh<sub>2</sub>[(S)-2-Cl-5-BrTPCP]<sub>4</sub>

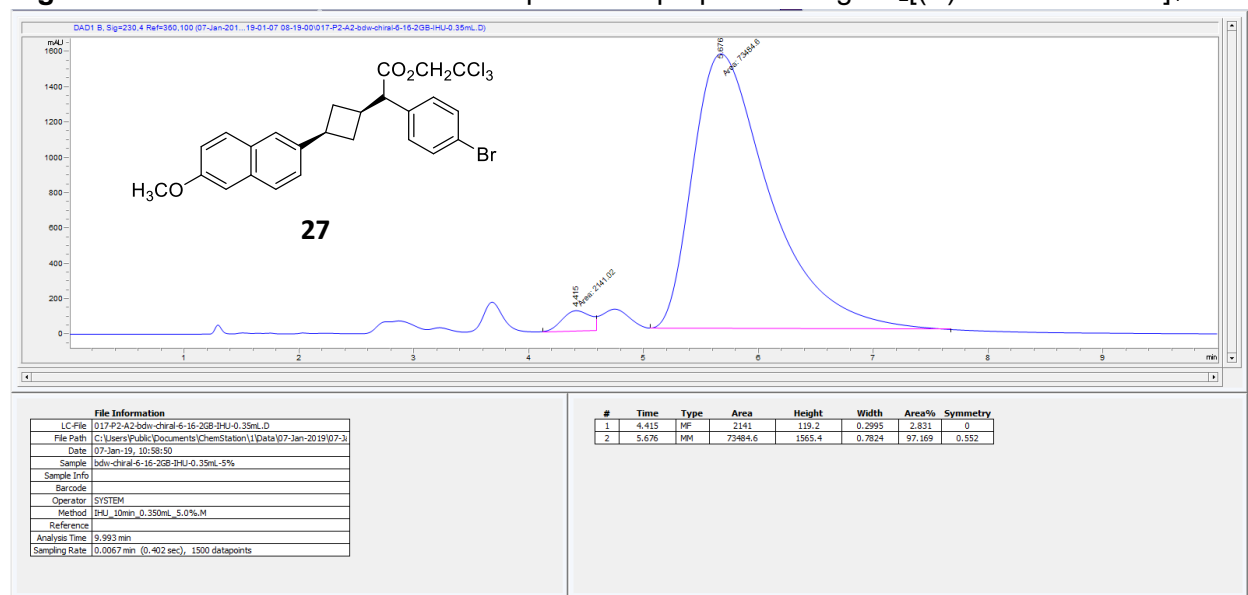

**Figure S129.** Chiral HPLC trace for *rac*-**28** prepared using Rh<sub>2</sub>[(R/S)-2-Cl-5-BrTPCP]<sub>4</sub>

**Chromatogram :**

**BDW-6-17-2F(SSW-60MIN-1ML-0.5%)244\_chan**

System : Prostar LC System  
Method : OD\_30min\_1mL\_0.5%\_230nm  
User : User1

Acquired : 9/5/2018 10:55:19 PM  
Processed : 1/7/2019 10:34:17 AM  
Printed : 1/7/2019 10:36:26 AM

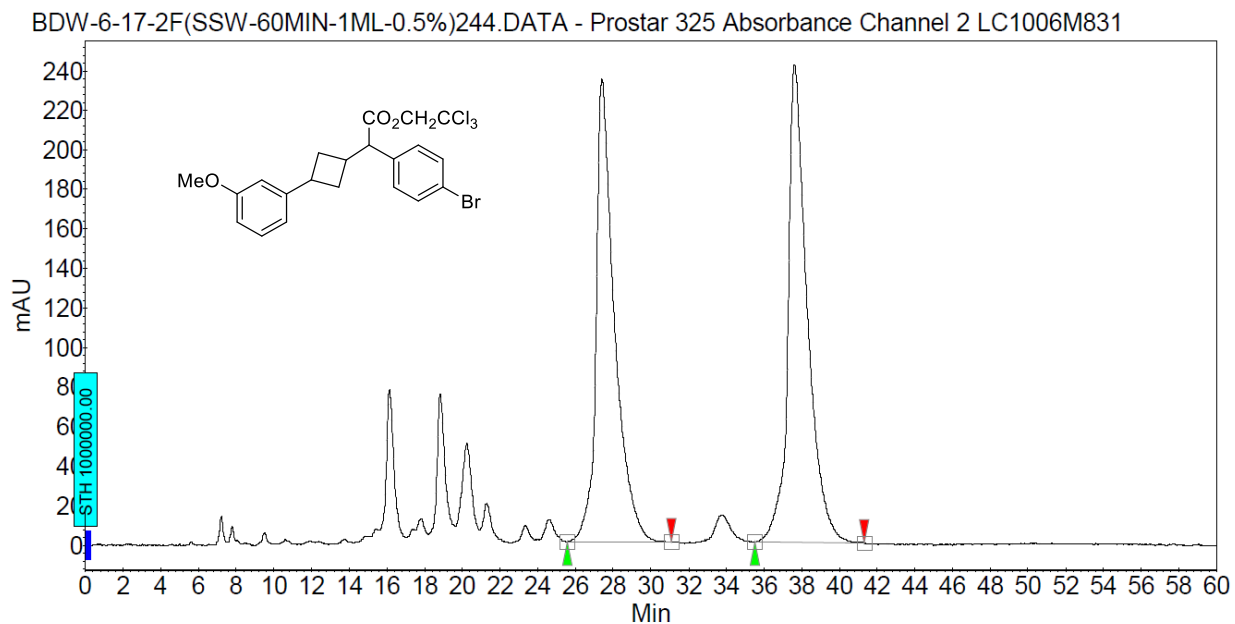

**Peak results :**

| Index | Name    | Time [Min] | Quantity [% Area] | Height [mAU] | Area [mAU.Min] | Area % [%] |
|-------|---------|------------|-------------------|--------------|----------------|------------|
| 1     | UNKNOWN | 27.40      | 47.90             | 233.9        | 265.1          | 47.896     |
| 2     | UNKNOWN | 37.61      | 52.10             | 241.6        | 288.4          | 52.104     |
| Total |         |            | 100.00            | 475.5        | 553.4          | 100.000    |

**Figure S130.** Chiral HPLC trace of compound **28** prepared using  $\text{Rh}_2[(\text{S})\text{-2-Cl-5-BrTPCP}]_4$

**Chromatogram :**

**BDW-6-16-2F-B(SSW-60MIN-1ML-0.5%)241\_chan**

ne12: Prostar LC System

Method : OD\_30min\_1mL\_0.5%\_230nm

User : User1

Acquired : 9/5/2018 9:06:28 PM

Processed : 9/6/2018 11:19:50 AM

Printed : 1/7/2019 10:36:18 AM

BDW-6-16-2F-B(SSW-60MIN-1ML-0.5%)241.DATA - Prostar 325 Absorbance Channel 2 LC1006M831

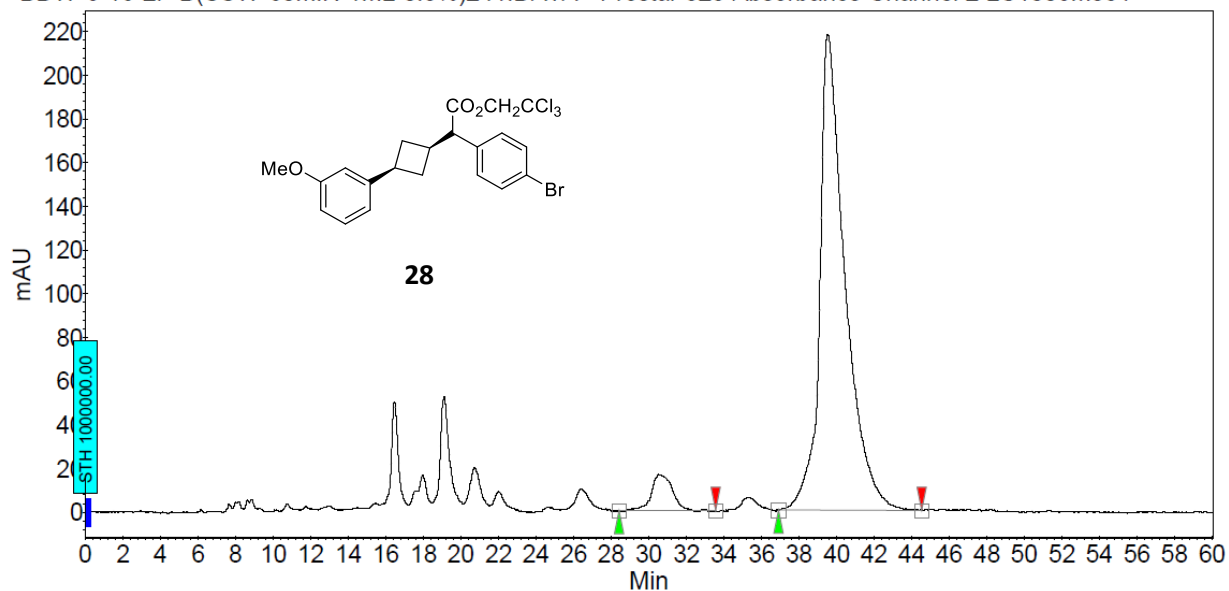

**Peak results :**

| Index | Name    | Time [Min] | Quantity [% Area] | Height [mAU] | Area [mAU.Min] | Area % [%] |
|-------|---------|------------|-------------------|--------------|----------------|------------|
| 2     | UNKNOWN | 30.50      | 5.85              | 16.5         | 21.2           | 5.847      |
| 1     | UNKNOWN | 39.53      | 94.15             | 217.6        | 341.7          | 94.153     |
| Total |         |            | 100.00            | 234.0        | 363.0          | 100.000    |

**Figure S131.** Chiral HPLC trace for *rac*-**29** prepared using Rh<sub>2</sub>[(R/S)-2-Cl-5-BrTPCP]<sub>4</sub>

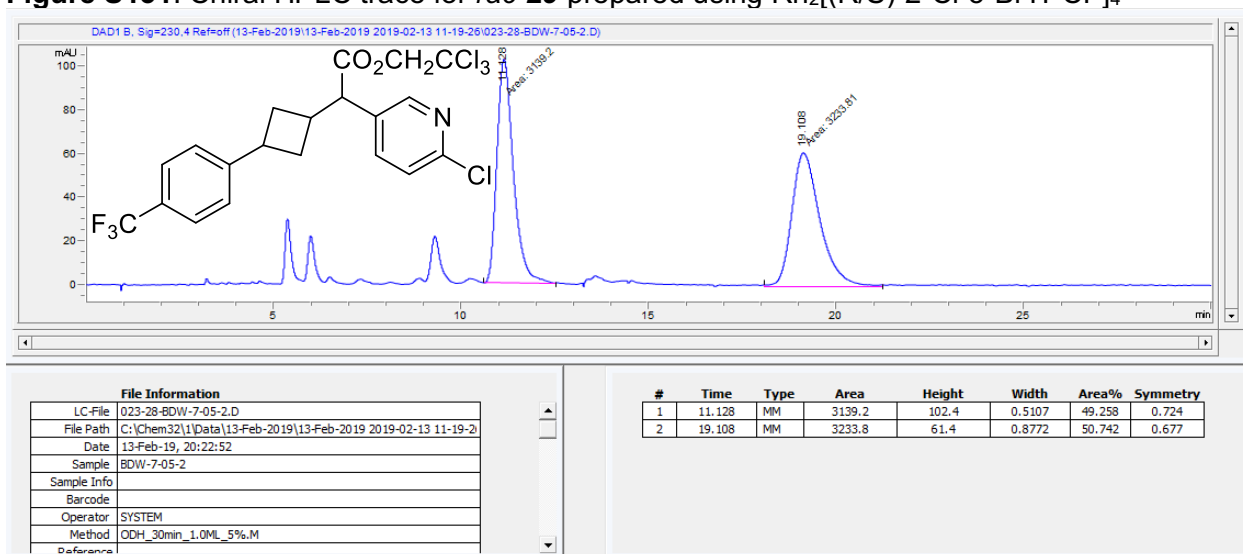

**Figure S132.** Chiral HPLC trace of compound **29** prepared using Rh<sub>2</sub>[(S)-2-Cl-5-BrTPCP]<sub>4</sub>

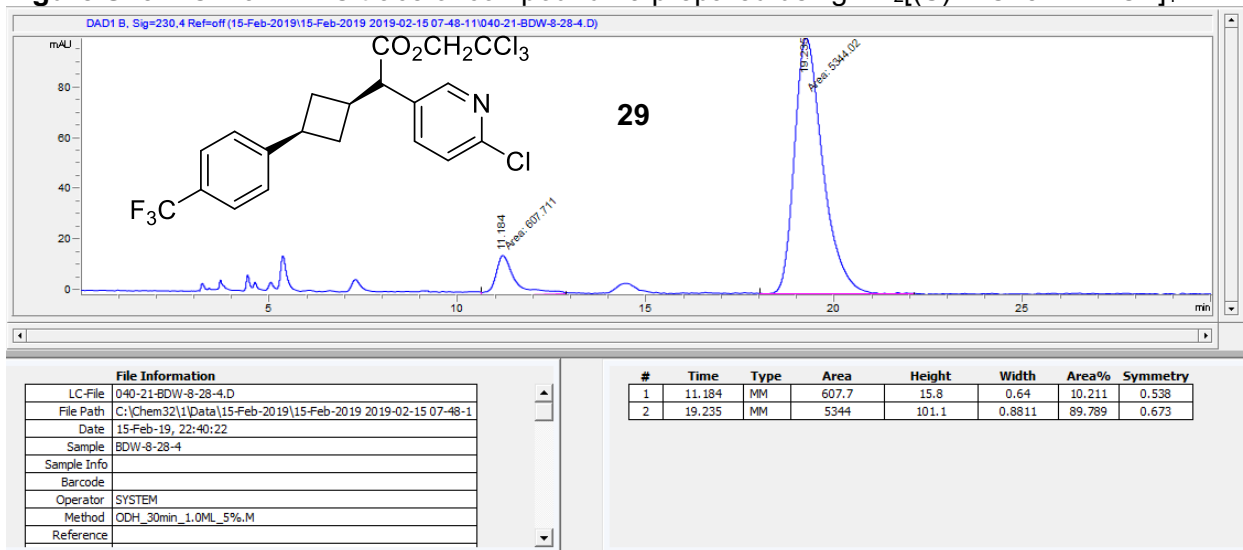

**Figure S133.** Chiral HPLC trace for *rac*-**30** prepared using Rh<sub>2</sub>[(R/S)-2-Cl-5-BrTPCP]<sub>4</sub>

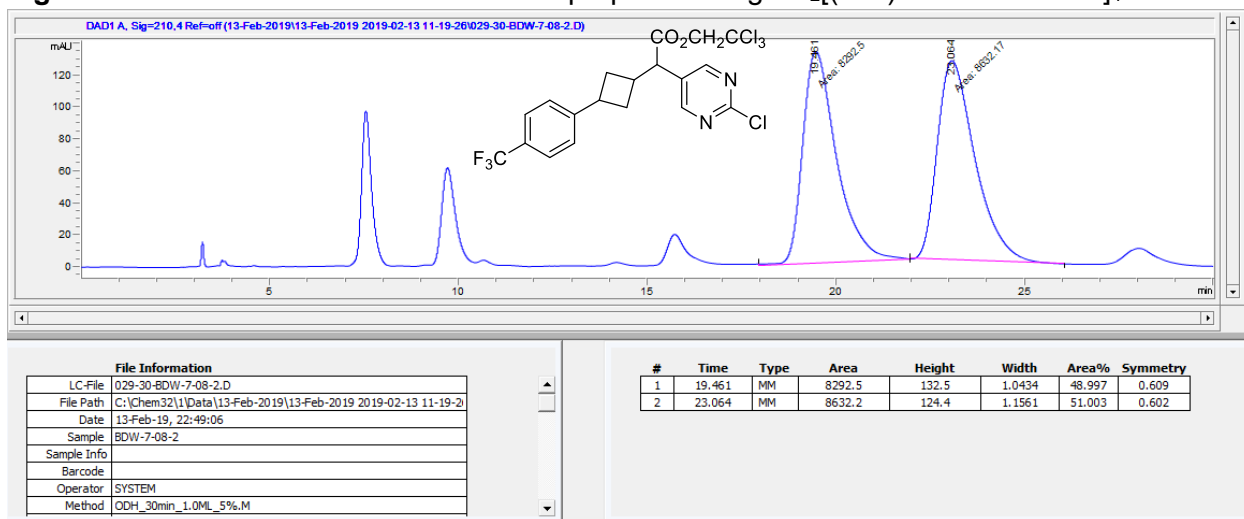

**Figure S134.** Chiral HPLC trace of compound **30** prepared using Rh<sub>2</sub>[(S)-2-Cl-5-BrTPCP]<sub>4</sub>

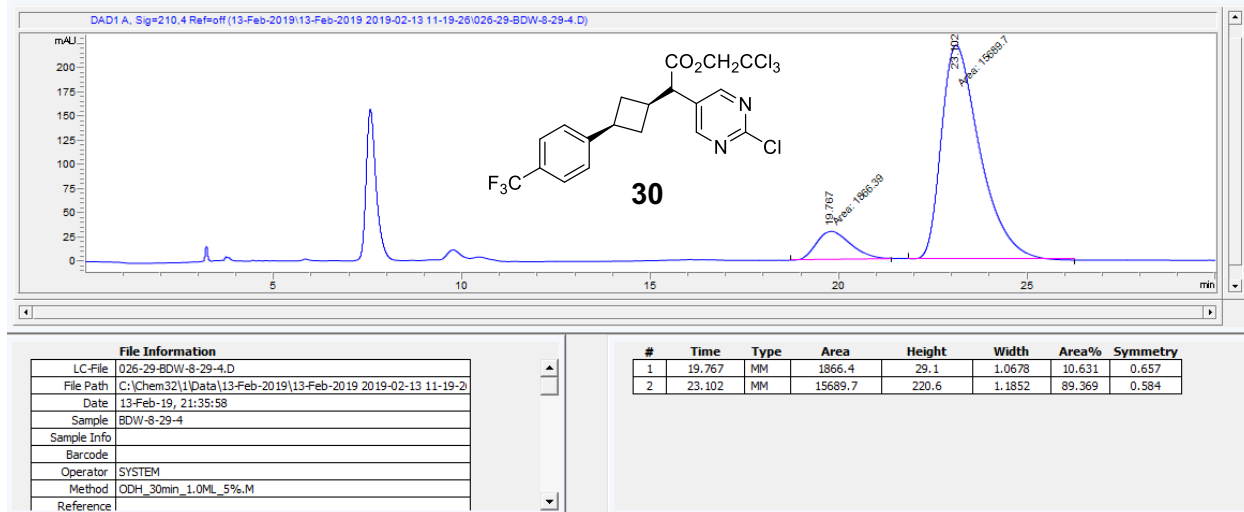

**Figure S135.** Chiral HPLC trace for *rac*-**31** prepared using Rh<sub>2</sub>[(R/S)-2-Cl-5-BrTPCP]<sub>4</sub>

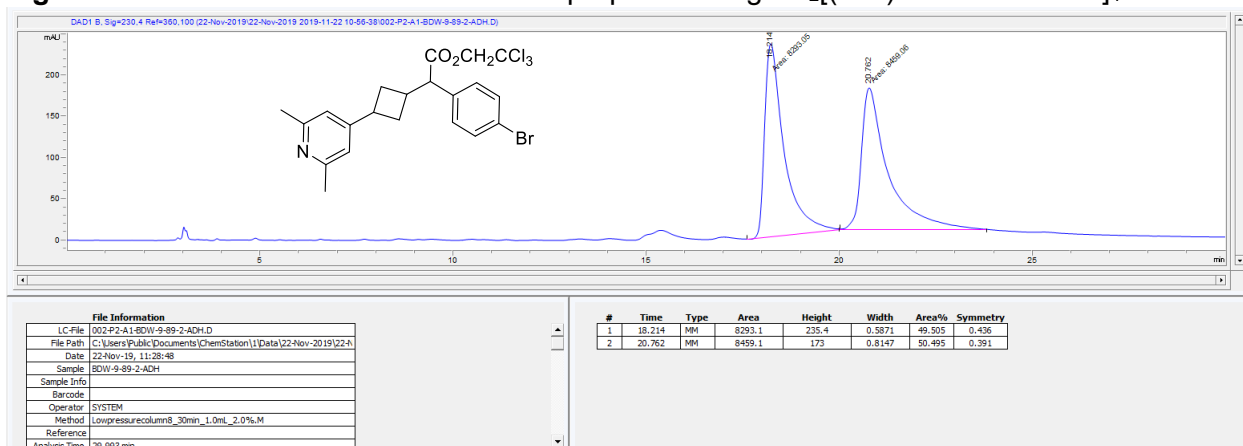

**Figure S136.** Chiral HPLC trace of compound **31** prepared using Rh<sub>2</sub>[(S)-2-Cl-5-BrTPCP]<sub>4</sub>

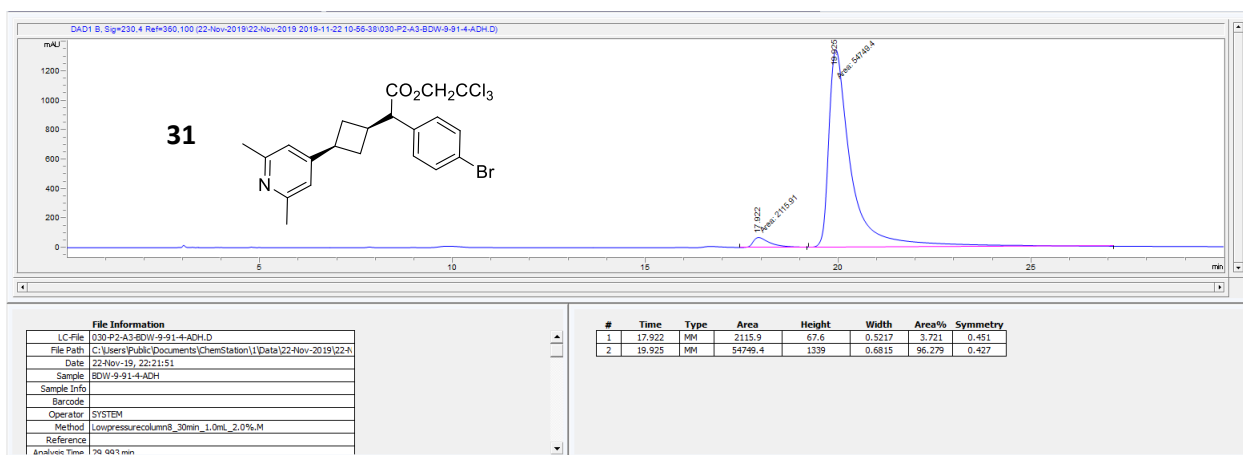

**Figure S137.** Chiral HPLC trace for *rac*-**32** prepared using Rh<sub>2</sub>[(R/S)-2-Cl-5-BrTPCP]<sub>4</sub>

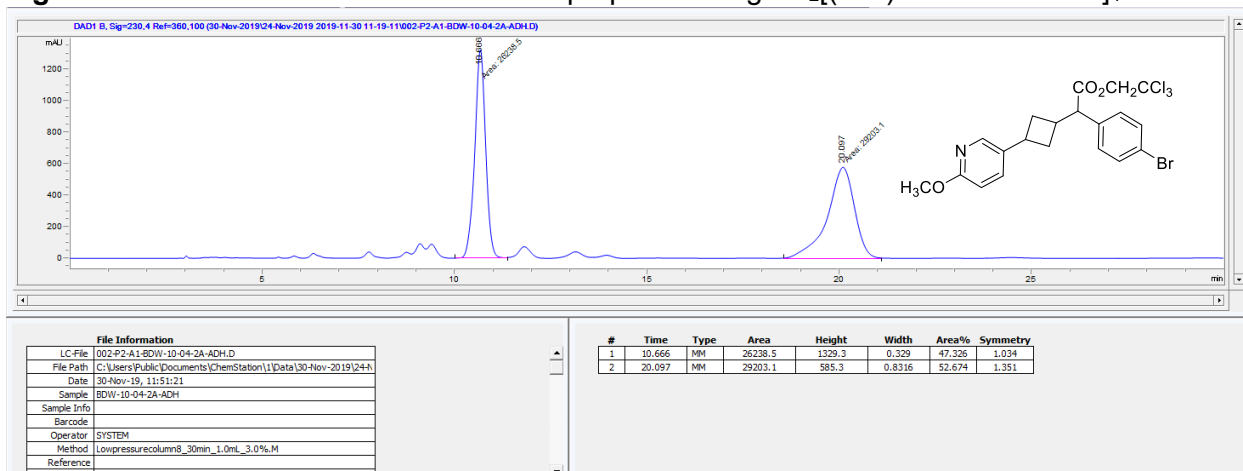

**Figure S138.** Chiral HPLC trace of compound **32** prepared using Rh<sub>2</sub>[(S)-2-Cl-5-BrTPCP]<sub>4</sub>

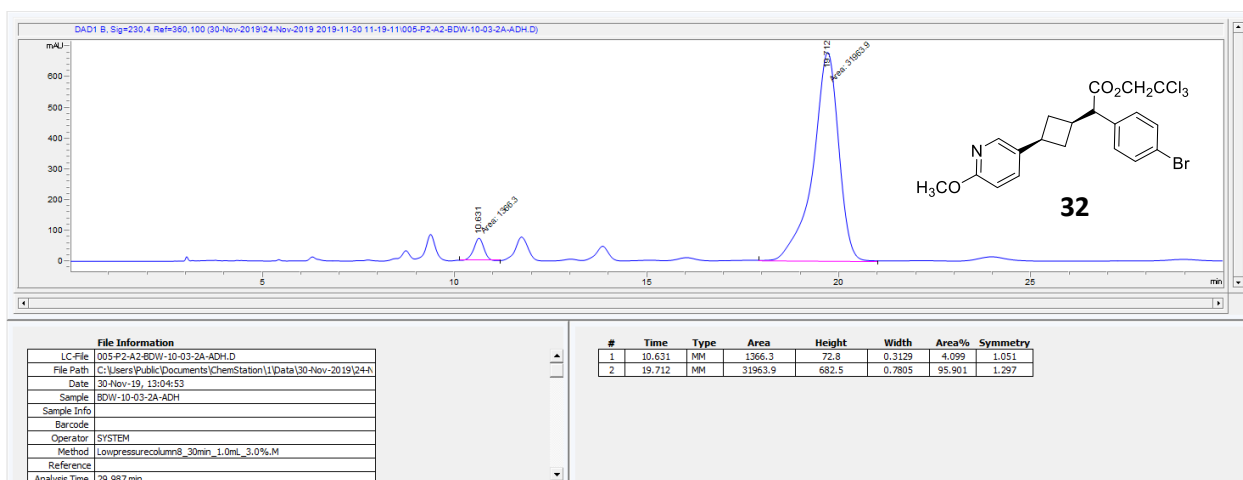

Supplement: NIHMS1569435-supplement-1.pdf [file NIHMS1569435-supplement-1.pdf]
